# Supplementary material for: Transcriptomic Analysis of Mouse Brain After Traumatic Brain Injury Reveals That the Angiotensin Receptor Blocker Candesartan Acts Through Novel Pathways
Source: Front Neurosci. 2021 Mar 22;15:636259. doi: 10.3389/fnins.2021.636259 (PMC8019829; doi:10.3389/fnins.2021.636259)
Supplement: Supplementary file 1 [file Table_1.xlsx]

## Sheet: 3dpi-Hippocampus
Supplementary Table 1. Differentially expressed genes in all brain regions, times, and conditions. Differential gene expression of each condition as compared to Sham + VH.
3 Days Post Injury - Hippocampus
TBI+VH												Sham+CD												TBI+CD
Down-Regulated						Up-Regulated						Down-Regulated						Up-Regulated						Down-Regulated						Up-Regulated
Gene	Base Mean	Log2 Fold Change	p value	p-adj		Gene	Base Mean	Log2 Fold Change	p value	p-adj		Gene	Base Mean	Log2 Fold Change	p value	p-adj		Gene	Base Mean	Log2 Fold Change	p value	p-adj		Gene	Base Mean	Log2 Fold Change	p value	p-adj		Gene	Base Mean	Log2 Fold Change	p value	p-adj
Ahcyl2	5644.57	-0.484332	8.10216e-13	5.37406e-11		C4b	3200.04	2.61844	1.93346e-142	3.70625e-138		Nxn	347.735	-0.685968	1.85752e-11	3.3935e-07		Kcnh7	166.018	0.662504	8.60771e-06	0.00135408		Ahcyl2	5644.57	-0.479352	1.37205e-12	6.88628e-11		C4b	3200.04	2.64515	2.5458e-145	4.65092e-141
Ogn	141.449	-1.16184	7.65848e-11	3.75461e-09		Gfap	53653	2.82769	4.72952e-80	4.53301e-76		Prkcq	320.483	-0.663479	2.89314e-10	2.05227e-06		Fam135b	530.816	0.46544	1.0968e-05	0.00161593		Ogn	141.449	-1.12947	2.5785e-10	9.45857e-09		Gfap	53653	2.85009	3.11519e-81	2.84557e-77
Igsf1	315.671	-0.727848	2.2111e-10	1.01558e-08		Aspg	260.58	2.4481	8.10338e-59	5.17779e-55		Acaa2	570.614	-0.707619	4.1866e-10	2.05227e-06		Kcnb2	179.025	0.457681	1.26478e-05	0.00177741		Slc6a15	1692.73	-0.355476	8.38696e-10	2.86395e-08		Aspg	260.58	2.35498	8.42411e-55	5.13e-51
Crhr2	74.6293	-1.09343	1.50672e-09	6.22465e-08		Tgm1	682.267	2.25662	6.14179e-51	2.9433e-47		Mdfic	124.207	-1.08589	4.49344e-10	2.05227e-06		Kctd16	203.344	0.4447	1.49734e-05	0.00202629		Calb1	2486.52	-0.498149	2.12038e-09	6.77225e-08		Itgam	1300.14	1.78736	5.04642e-54	2.30483e-50
Stk39	1636.87	-0.545522	3.10092e-08	1.02662e-06		Vim	6877.08	2.51374	1.12221e-49	3.72066e-46		Cdr2	254.392	-1.01105	1.38512e-09	5.06095e-06		Dach1	83.0167	0.554021	1.84406e-05	0.00234903		Npy1r	704.544	-0.424646	1.0341e-08	3.02756e-07		Tgm1	682.267	2.25009	7.96465e-51	2.91012e-47
Atp2b3	7379.42	-0.471937	3.83614e-08	1.24425e-06		Chil1	495.644	1.64367	1.16459e-49	3.72066e-46		Pla2g5	57.7365	-0.990346	8.09039e-09	2.46339e-05		Zbed6	683.296	0.401802	2.57283e-05	0.00283822		Hs6st2	545.016	-0.569652	1.76023e-08	4.93215e-07		Unc93b1	743.912	1.67553	5.04121e-50	1.53497e-46
Inha	489.328	-0.426552	5.52931e-08	1.72624e-06		Itgam	1300.14	1.67759	8.05712e-48	2.20638e-44		AK077163	137.977	-0.956034	1.5306e-08	3.77816e-05		AK079811	79.5273	0.597778	5.03347e-05	0.00464427		Stk39	1636.87	-0.541768	3.82778e-08	1.01347e-06		Vim	6877.08	2.50355	2.45879e-49	6.41709e-46
Cnst	1005.12	-0.371397	7.73362e-08	2.34938e-06		C1qc	2797.45	1.88743	2.70033e-46	6.47032e-43		Ctnnal1	466.392	-0.668139	1.87134e-08	3.77816e-05		AK134750	445.102	0.456964	8.09288e-05	0.00651316		Cnst	1005.12	-0.379721	3.91436e-08	1.0349e-06		C1qc	2797.45	1.94909	3.33287e-49	7.61102e-46
Slc29a4	1113.24	-0.764612	1.22684e-07	3.63483e-06		C1qb	2990.49	1.88061	8.27273e-46	1.762e-42		Acacb	167.914	-0.862909	2.0496e-08	3.77816e-05		AK081211	1042.89	0.376318	0.000100095	0.00761935		Tdo2	135.878	-0.848258	1.68391e-07	3.93897e-06		C1qb	2990.49	1.91445	2.20352e-47	4.4729e-44
Atp11c	354.478	-0.628022	1.54883e-07	4.4984e-06		Serpina3n	8474.1	2.12027	1.79577e-43	3.44231e-40		Sulf1	638.542	-0.828176	2.19624e-08	3.77816e-05		Cbl	782.482	0.347998	0.000259792	0.0145142		Cnih3	1557.68	-0.32655	1.90694e-07	4.40429e-06		Hspb6	372.496	1.97034	7.92274e-45	1.44741e-41
Mas1	1025.86	-0.383561	1.66272e-07	4.80734e-06		Hspb6	372.496	1.91761	1.39742e-42	2.4352e-39		Krt8	27.2696	-0.838182	2.27488e-08	3.77816e-05		BC005561	207.312	0.437313	0.000272478	0.0148152		Brwd3	197.027	-0.584072	4.3026e-07	9.24755e-06		Serpina3n	8474.1	2.1299	7.77264e-44	1.29089e-40
Gm11744	71.8063	-0.849434	1.86251e-07	5.34467e-06		Unc93b1	743.912	1.50921	6.79384e-41	1.08526e-37		Aqp1	198.21	-0.576905	3.98044e-08	5.57185e-05		Grin2b	1215.96	0.483906	0.000379387	0.0188856		Hes5	149.789	-0.726848	4.32818e-07	9.26981e-06		Ctss	2525.72	1.6421	9.21363e-44	1.4027e-40
Frem1	178.707	-0.929592	2.96427e-07	8.1641e-06		Rac2	240.987	2.05507	2.45267e-40	3.61656e-37		Trpv4	163.025	-0.789468	4.26985e-08	5.57185e-05		Cacna1e	7724.67	0.327127	0.00068281	0.0282223		Gpc5	1141.79	-0.382273	4.35005e-07	9.29487e-06		Chil1	495.644	1.53435	1.75402e-43	2.46493e-40
Gmnc	100.883	-0.931659	3.55585e-07	9.6821e-06		Olfml3	1275.71	1.68933	1.051e-38	1.43904e-35		Ccdc24	36.8955	-1.00118	5.30789e-08	6.46465e-05		Pcdhb5	124.547	0.38597	0.000688866	0.0283004		Usp29	716.787	-0.399343	7.12192e-07	1.45864e-05		Olfml3	1275.71	1.78078	9.08062e-43	1.18496e-39
Cldn2	194.433	-0.622501	4.51551e-07	1.20053e-05		Ctss	2525.72	1.52572	4.77837e-38	6.10643e-35		F11r	255.705	-0.784204	5.71669e-08	6.52739e-05		Cntnap5a	244.266	0.458391	0.000755773	0.0296292		Crhr2	74.6293	-0.901373	7.65771e-07	1.54927e-05		Csf1r	4597.33	1.34926	5.85491e-42	7.13089e-39
Aqp1	198.21	-0.568246	5.74685e-07	1.50288e-05		Pld4	547.093	1.61012	1.94512e-36	2.33037e-33		Col9a3	830.334	-0.954576	9.37726e-08	8.91076e-05		Kcnq3	814.995	0.42437	0.000826791	0.031468		Sh3bgrl2	532.57	-0.385956	8.73717e-07	1.75021e-05		C4a	210.858	1.48189	2.07755e-41	2.37218e-38
Zfp185	111.833	-0.920061	6.41095e-07	1.64734e-05		Csf1r	4597.33	1.24288	7.21003e-36	8.12994e-33		Efhb	23.3887	-0.982475	9.73632e-08	8.91076e-05		Arfgef3	1257.95	0.344491	0.0008726	0.0323358		Igsf1	315.671	-0.557472	1.03291e-06	2.04444e-05		Rac2	240.987	2.07753	3.69328e-41	3.96897e-38
Kcne2	145.077	-0.427248	8.5786e-07	2.14398e-05		2810459M11Rik	717.107	1.24299	8.01627e-36	8.53688e-33		Aldh3b1	187.641	-0.619226	9.75506e-08	8.91076e-05		Cep85l	176.938	0.425948	0.00103649	0.0362152		Acvr2a	1299.94	-0.375355	1.72767e-06	3.264e-05		Itgb2	296.165	1.90189	2.42075e-40	2.45692e-37
Slc4a5	227.43	-0.381874	1.23046e-06	2.98565e-05		Ctsh	513.381	1.49381	3.74145e-35	3.77473e-32		Vat1l	940.445	-0.982001	1.24945e-07	0.000102133		Cdkl5	885.796	0.389139	0.00104373	0.036389		Ccdc39	538.793	-0.39766	1.76772e-06	3.33277e-05		Ctsh	513.381	1.60456	2.61437e-40	2.51378e-37
Prlr	343.481	-0.794882	1.6559e-06	3.93821e-05		C4a	210.858	1.34963	1.80428e-34	1.72932e-31		Crb2	230.645	-0.724135	1.25622e-07	0.000102133		Sacs	222.62	0.464968	0.00108563	0.0374339		Nol4	1687.4	-0.322216	1.93565e-06	3.63437e-05		Pld4	547.093	1.69581	3.23911e-40	2.95876e-37
Gdf10	295.055	-0.440976	1.71425e-06	4.06506e-05		Fcgr3	686.842	1.72005	1.93454e-34	1.76587e-31		1500015O10Rik	284.834	-0.694315	1.28884e-07	0.000102133		Gucy1a2	1195.05	0.369807	0.00120121	0.0402658		Peg3	4851.51	-0.323821	2.54211e-06	4.65816e-05		Selplg	1104.51	0.898342	4.97976e-40	4.33216e-37
Vwa3a	377.406	-0.73121	1.87926e-06	4.42007e-05		Tyrobp	776.388	1.70771	2.19393e-34	1.91161e-31		Whrn	585.481	-0.50921	1.34172e-07	0.000102133		S100a9	9.89427	0.502213	0.00125173	0.0414344		Atp2b3	7379.42	-0.402522	2.72833e-06	4.95958e-05		Slco2b1	692.443	1.20574	1.19054e-39	9.88635e-37
Baiap2l1	40.3908	-0.728733	2.16622e-06	5.03935e-05		P4ha3	218.905	1.79975	3.08567e-34	2.5717e-31		Vamp8	307.308	-0.798523	1.42324e-07	0.0001023		Dgki	589.465	0.389118	0.00132775	0.0433929		Kcnj4	1346.21	-0.429267	3.29819e-06	5.88424e-05		Csf3r	325.224	1.76468	1.95115e-38	1.54981e-35
Perp	89.2287	-0.900344	2.34458e-06	5.39535e-05		Lgi4	1481.21	0.954695	9.40868e-34	7.22625e-31		Prlr	343.481	-0.825744	1.50046e-07	0.0001023		4921504A21Rik	44.3229	0.53362	0.00143507	0.0455952		Fras1	613.854	-0.561186	3.32522e-06	5.92667e-05		Bin2	316.509	1.72639	2.79302e-38	2.12607e-35
F5	465.95	-0.492117	2.39443e-06	5.49406e-05		Id3	885.644	0.998403	9.4244e-34	7.22625e-31		Pon3	92.6288	-0.887915	1.5119e-07	0.0001023		AK150110	81.6911	0.462154	0.00156487	0.0482101		Slc4a10	5104.66	-0.355505	4.98768e-06	8.58812e-05		Gpr17	3201.54	1.46096	1.09488e-37	8.00098e-35
Fam163a	369.425	-0.384091	2.66086e-06	6.07939e-05		Bin2	316.509	1.61202	1.25695e-33	9.26709e-31		Fxyd1	1353.42	-0.652092	1.67508e-07	0.000108476		AK039495	58.8712	0.462066	0.00166678	0.0495934		Ralgapa2	715.424	-0.401531	5.42529e-06	9.2544e-05		Fcgr3	686.842	1.80175	1.45796e-37	1.02444e-34
Eps8l2	119.475	-0.884245	2.74826e-06	6.25669e-05		Cd52	118.781	2.20125	1.74717e-33	1.24043e-30		Tcn2	777.305	-0.752128	1.72332e-07	0.000108476								Plekhd1	143.881	-0.532628	5.4339e-06	9.25646e-05		P4ha3	218.905	1.87216	7.6255e-37	5.15964e-34
Hes5	149.789	-0.673344	2.80066e-06	6.36088e-05		Glycam1	61.8218	2.48146	7.19266e-33	4.92415e-30		Zfp185	111.833	-0.962695	1.78132e-07	0.000108476								Trp73	135.533	-0.667326	8.86083e-06	0.000145182		Inpp5d	599.821	1.6537	8.26917e-37	5.39534e-34
Tbc1d9	2707.59	-0.551115	2.80569e-06	6.36477e-05		Fcgr2b	232.155	2.03178	3.7698e-32	2.49184e-29		Ezr	2532.93	-0.557261	2.38178e-07	0.000140364								Asxl3	274.465	-0.465823	9.09079e-06	0.000148551		Kcne1l	194.091	1.53752	1.70212e-36	1.07228e-33
Tinagl1	83.3793	-0.850218	2.82888e-06	6.40979e-05		Kcne1l	194.091	1.42876	1.10138e-31	7.03747e-29		Slc12a4	763.423	-0.603203	2.57688e-07	0.000142198								Tpd52l1	544.883	-0.337813	1.02779e-05	0.000165287		Il10ra	219.971	1.62813	4.73937e-36	2.88612e-33
Abca4	243.622	-0.683888	2.87154e-06	6.4911e-05		Parp3	261.328	1.72555	1.174e-31	7.2595e-29		Smim1	285.786	-0.517562	2.61404e-07	0.000142198								Lingo2	382.86	-0.335077	1.1644e-05	0.000184177		Fermt3	239.721	1.76089	8.10126e-36	4.77426e-33
Slc44a5	1228.57	-0.411135	3.15364e-06	7.06216e-05		Inpp5d	599.821	1.52191	1.78348e-31	1.06836e-28		Crhr2	74.6293	-0.941228	2.64641e-07	0.000142198								Emb	603.893	-0.589696	1.16653e-05	0.000184354		Cd52	118.781	2.28382	2.34955e-35	1.34137e-32
Sostdc1	183.957	-0.813902	3.26014e-06	7.27516e-05		Slco2b1	692.443	1.06826	2.24822e-31	1.30594e-28		Lmx1a	19.063	-0.723074	3.38189e-07	0.000176525								Tbc1d9	2707.59	-0.512404	1.32811e-05	0.000207733		Laptm5	1208.72	1.46726	2.99671e-35	1.659e-32
Trpm3	1812.17	-0.851033	3.61041e-06	7.95493e-05		Gpam	1620.42	0.814449	2.42422e-31	1.36676e-28		Mycbpap	77.4556	-0.948495	3.865e-07	0.000191214								Map3k5	647.98	-0.331325	1.36407e-05	0.000212448		Fgd2	245.695	1.56382	4.52091e-35	2.42919e-32
Emb	603.893	-0.622055	3.7719e-06	8.26327e-05		Laptm5	1208.72	1.37216	4.75344e-31	2.60339e-28		Galm	100.618	-0.780712	3.90601e-07	0.000191214								Pdyn	259.688	-0.610641	1.43148e-05	0.00022125		Fcgr2b	232.155	2.10694	3.44394e-34	1.79764e-31
Phactr2	952.092	-0.40094	3.89185e-06	8.5163e-05		Ggta1	271.699	1.79958	8.8933e-31	4.66917e-28		Cd82	500.069	-0.675669	3.97731e-07	0.000191214								Atp11c	354.478	-0.517288	1.48005e-05	0.000228178		Ggta1	271.699	1.90369	4.33297e-34	2.14242e-31
Tbc1d2	140.281	-0.766729	4.00955e-06	8.73399e-05		Itgb2	296.165	1.64467	9.01244e-31	4.66917e-28		Cd59a	250.022	-0.803085	4.28651e-07	0.000198438								Magee2	260.662	-0.49736	1.65937e-05	0.000252625		Glycam1	61.8218	2.5487	4.38944e-34	2.14242e-31
Gck	91.1319	-0.775982	4.03555e-06	8.77069e-05		Trem2	588.874	1.69613	1.2413e-30	6.26169e-28		Rdh5	150.42	-0.880518	4.62393e-07	0.000198438								Palmd	709.639	-0.345845	1.68391e-05	0.00025551		Parp3	261.328	1.79528	4.45629e-34	2.14242e-31
Ttr	25996.9	-0.351253	4.44088e-06	9.55411e-05		Fermt3	239.721	1.61221	2.26963e-30	1.11555e-27		BC067074_	69.4657	-0.883019	4.62416e-07	0.000198438								Vwa3a	377.406	-0.651062	2.23396e-05	0.000330463		2810459M11Rik	717.107	1.18992	5.85494e-33	2.74266e-30
AK013627	58.8735	-0.603612	4.61634e-06	9.85419e-05		Il10ra	219.971	1.48268	3.51701e-30	1.68544e-27		Serhl	199.553	-0.76921	4.62507e-07	0.000198438								Il1rapl1	67.5451	-0.644004	3.10166e-05	0.000447231		Tyrobp	776.388	1.66171	1.10031e-32	5.02537e-30
Kl	1340.24	-0.761137	5.59455e-06	0.000117848		Csf3r	325.224	1.55051	3.90474e-30	1.82561e-27		Sfrp5	21.9007	-0.80321	4.67066e-07	0.000198438								Gdf10	295.055	-0.378865	3.65977e-05	0.000517896		Spi1	144.283	1.77724	1.36586e-32	6.08606e-30
Cab39l	896.968	-0.786087	5.84626e-06	0.000122138		Stat3	1652.71	0.957922	7.25121e-30	3.30949e-27		Kcne2	145.077	-0.4282	4.8812e-07	0.000200836								Pcp4	651.639	-0.465365	4.01516e-05	0.000561661		Id3	885.644	0.976627	2.29411e-32	9.97882e-30
Tjp3	55.7031	-0.860071	6.47706e-06	0.000134081		Adgre1	330.887	1.86162	1.75753e-29	7.8349e-27		A2m	1193.35	-0.507478	4.99701e-07	0.000200836								Gm11744	71.8063	-0.666087	4.24648e-05	0.000589505		Stat3	1652.71	0.992451	5.8557e-32	2.48785e-29
Trpv4	163.025	-0.73084	6.66737e-06	0.000137427		Fgd2	245.695	1.42158	2.9891e-29	1.30223e-26		Gpx8	185.055	-0.781083	5.05689e-07	0.000200836								Gmnc	100.883	-0.761898	4.39954e-05	0.000609827		Trem2	588.874	1.72969	9.19542e-32	3.81798e-29
Trp73	135.533	-0.675769	6.88528e-06	0.00014131		Slc14a1	832.739	1.17048	4.92236e-29	2.09682e-26		Stk39	1636.87	-0.493741	5.568e-07	0.000216429								Cdh12	203.171	-0.436763	4.47034e-05	0.000618234		Mt1	5343.72	1.23838	1.44022e-31	5.84697e-29
Tpd52l1	544.883	-0.341954	8.12672e-06	0.000163223		C1qa	2619.29	1.69548	6.40619e-29	2.66957e-26		Tekt1	98.7828	-0.859295	6.04559e-07	0.000230097								Cfap69	255.922	-0.494235	4.59577e-05	0.000633183		Slc14a1	832.739	1.22117	1.76618e-31	7.01444e-29
1500015O10Rik	284.834	-0.660864	8.13176e-06	0.000163223		Cebpa	408.685	1.08447	9.04423e-29	3.6887e-26		Nek5	39.5768	-0.924643	7.35836e-07	0.000274347								Cacna2d2	757.721	-0.360654	4.79449e-05	0.000657587		Fcer1g	422.366	1.73968	1.4152e-30	5.50093e-28
Tuft1	93.3077	-0.658985	9.08407e-06	0.000179642		Fcer1g	422.366	1.68165	9.87935e-29	3.94536e-26		Steap1	42.191	-0.580818	9.74896e-07	0.000349724								Lrriq1	54.9013	-0.65892	4.94383e-05	0.000675534		Capg	206.344	1.83685	1.518e-30	5.77756e-28
Vat1l	940.445	-0.835498	9.69211e-06	0.000190552		S100a6	665.391	1.90348	2.60282e-28	1.01823e-25		Mpp7	70.1009	-0.723402	9.76294e-07	0.000349724								Rsph4a	164.421	-0.649612	6.24924e-05	0.000834557		Pnpla7	732.384	0.851675	2.04147e-30	7.61133e-28
Epn3	125.146	-0.812755	1.0204e-05	0.000199797		Serpinf2	86.1559	2.06601	2.66614e-28	1.02214e-25		Rsph1	138.484	-0.820719	1.02087e-06	0.00035866								Amer1	234.922	-0.349628	6.42661e-05	0.000853874		Hmha1	341.726	1.47995	2.94977e-30	1.07779e-27
Slc5a6	455.795	-0.496669	1.02283e-05	0.000200067		Prdx6	8527.38	1.32274	5.31536e-28	1.99785e-25		Cdkn1c	144.157	-0.858539	1.05953e-06	0.00036522								Hecw1	1030.66	-0.332502	6.8429e-05	0.00089908		Ncf1	391.355	1.72867	4.65905e-30	1.66894e-27
Enpp2	14038.1	-0.714152	1.03523e-05	0.00020208		Mt1	5343.72	1.15938	6.99148e-28	2.5773e-25		Emb	603.893	-0.65647	1.10113e-06	0.00037253								Arhgap20	1625.54	-0.362553	7.16103e-05	0.000929814		Lgi4	1481.21	0.893883	8.95654e-30	3.14667e-27
Msx1	175.8	-0.841651	1.11787e-05	0.00021623		Capg	206.344	1.74543	7.32262e-28	2.64844e-25		Cldn2	194.433	-0.617248	1.16992e-06	0.000388604								Slc12a2	1509.1	-0.431772	8.00371e-05	0.00102827		Mt3	6623.24	0.622639	9.40256e-30	3.24105e-27
Igf2	1925.64	-0.749052	1.12245e-05	0.000216897		Flnc	276.795	1.83545	1.79648e-27	6.37717e-25		F5	465.95	-0.494286	1.24222e-06	0.0004044								Aff2	222.939	-0.417234	8.20544e-05	0.00104959		Add3	5090.55	0.772504	9.63374e-30	3.25924e-27
Npy1r	704.544	-0.323196	1.21875e-05	0.000233155		Hmha1	341.726	1.39818	3.50023e-27	1.20284e-24		Tcea3	19.1404	-0.878621	1.26565e-06	0.0004044								Lgi2	304.656	-0.403002	9.0939e-05	0.00114577		Grn	3121.62	1.43837	2.49104e-29	8.27434e-27
Folr1	254.198	-0.470047	1.40052e-05	0.000265021		Ly86	705.638	1.80936	3.51395e-27	1.20284e-24		Nqo1	129.71	-0.708476	1.28388e-06	0.0004044								Chrna4	588.532	-0.36561	9.22631e-05	0.00116005		C1qa	2619.29	1.70829	2.54791e-29	8.31211e-27
Vegfa	1203.21	-0.41646	1.40543e-05	0.000265686		Selplg	1104.51	0.734768	3.82129e-27	1.27363e-24		Enpp2	14038.1	-0.741746	1.33458e-06	0.000413246								Vwa5b1	71.7088	-0.731094	0.000114677	0.00140795		Ly86	705.638	1.87789	5.30542e-29	1.70043e-26
Acacb	167.914	-0.665692	1.43324e-05	0.000270145		Cd37	207.438	1.52384	3.85363e-27	1.27363e-24		Wdr78	268.719	-0.514149	1.55843e-06	0.000470063								Rd3	31.7919	-0.740976	0.000116218	0.00142423		Irf8	259.642	1.63504	8.32459e-29	2.6221e-26
Palmd	709.639	-0.348268	1.48562e-05	0.000279469		Rps6ka1	580.521	1.09228	5.02921e-27	1.63398e-24		Nid2	153.416	-0.868228	1.5876e-06	0.000470063								Vat1l	940.445	-0.733314	0.000122204	0.00148664		Rasal3	158.942	1.60675	1.16359e-28	3.60298e-26
Actn2	518.902	-0.414445	1.56251e-05	0.000291359		Mlc1	5774.51	0.636684	7.6189e-27	2.43411e-24		Elmo3	57.6601	-0.839174	1.62121e-06	0.000470063								Gpc3	116.274	-0.561817	0.000123114	0.00149545		Cd37	207.438	1.56484	1.59047e-28	4.84272e-26
Krt18	69.6514	-0.684671	1.56945e-05	0.000292369		Lag3	151.454	1.17295	8.10211e-27	2.54605e-24		Slc12a2	1509.1	-0.525523	1.63703e-06	0.000470063								Six3	18.7033	-0.690222	0.00013207	0.0015947		Adgre1	330.887	1.82168	2.18626e-28	6.54767e-26
Myo5c	36.9182	-0.823238	1.65126e-05	0.000304649		Add3	5090.55	0.727635	1.4657e-26	4.5316e-24		Slc2a12	210.525	-0.863739	1.64672e-06	0.000470063								Cdr2	254.392	-0.644106	0.000132227	0.00159555		4632428N05Rik	935.102	1.02912	2.67027e-28	7.86826e-26
St6galnac2	95.4275	-0.81038	1.65699e-05	0.000305412		Mpeg1	1769.52	1.79126	1.78451e-26	5.42972e-24		Slc4a2	1244.63	-0.861589	1.95861e-06	0.000550491								Cpne5	538.158	-0.412594	0.000135098	0.00162696		Nckap1l	609.308	1.49373	2.99752e-28	8.69232e-26
Kdr	269.519	-0.619661	1.72094e-05	0.00031659		Naprt	303.157	1.00864	2.5303e-26	7.57864e-24		Wdr86	46.0915	-0.463116	2.00516e-06	0.000555034								Slc9a7	371.247	-0.330095	0.000136346	0.00163875		Mt2	3868.3	1.44886	3.55231e-28	1.01402e-25
Ccdc39	538.793	-0.356642	1.7874e-05	0.000327872		Ncf1	391.355	1.60659	2.67728e-26	7.8955e-24		Adgrv1	97.0177	-0.648591	2.10053e-06	0.000572755								Gucy2g	84.644	-0.507494	0.000137323	0.00164941		Kcnk6	147.004	1.68614	3.84032e-28	1.07937e-25
AK078239	15.2072	-0.81353	2.0819e-05	0.000377917		Spi1	144.283	1.57745	3.54124e-26	1.02852e-23		Folr1	254.198	-0.477032	2.15072e-06	0.000577816								Rnf152	137.159	-0.603669	0.000140099	0.00167614		S100a6	665.391	1.89622	3.93453e-28	1.08909e-25
Wfdc2	35.7172	-0.549454	2.33102e-05	0.000418775		Grn	3121.62	1.33765	1.27294e-25	3.64194e-23		Cab39l	896.968	-0.819964	2.20332e-06	0.000583369								Slc29a4	1113.24	-0.550181	0.00014686	0.00174673		Prdx6	8527.38	1.3194	7.19157e-28	1.96094e-25
Slc2a12	210.525	-0.794787	2.4484e-05	0.000437812		S100a4	212.787	1.83011	1.63681e-25	4.61412e-23		Itpripl1	72.7253	-0.825674	2.35778e-06	0.000615348								Cul4b	1353.28	-0.356009	0.000147591	0.00175429		Mpeg1	1769.52	1.83935	1.01894e-27	2.7375e-25
Shisa2	123.256	-0.604528	2.52622e-05	0.000448797		Nckap1l	609.308	1.40778	2.64306e-25	7.34273e-23		Sfrp1	160.845	-0.82003	2.7188e-06	0.000685052								1700003M02Rik	60.1327	-0.723365	0.000155321	0.00183542		S100a1	1723.15	0.8897	1.06802e-27	2.82777e-25
Zcchc5	98.6009	-0.693036	2.67196e-05	0.000472498		Mt2	3868.3	1.36705	2.69272e-25	7.37381e-23		Perp	89.2287	-0.896259	2.73448e-06	0.000685052								Cdkl5	885.796	-0.447623	0.000165387	0.00194431		Cebpa	408.685	1.06112	1.30244e-27	3.39917e-25
Steap1	42.191	-0.557447	2.78499e-05	0.000490674		Cyth4	768.435	1.02976	3.10776e-25	8.39051e-23		Pcolce2	144.916	-0.846005	2.76555e-06	0.000685052								Perp	89.2287	-0.731983	0.000169495	0.00198876		Lag3	151.454	1.18847	1.56124e-27	4.01721e-25
Slc16a12	60.7622	-0.784857	2.84308e-05	0.000500449		Dhrs1	3492.98	1.55286	4.63688e-25	1.2345e-22		Slc4a5	227.43	-0.380704	2.80297e-06	0.000685052								BC021891	74.2958	-0.566635	0.000176638	0.00205955		Sat1	923.331	0.965029	2.18971e-27	5.55607e-25
Rab11fip1	72.4069	-0.777933	3.06907e-05	0.00053289		Klk6	232.671	1.7062	9.61074e-25	2.52367e-22		Rd3	31.7919	-0.858405	2.81235e-06	0.000685052								Ccdc24	36.8955	-0.694817	0.000176723	0.00205955		Rps6ka1	580.521	1.0967	3.02358e-27	7.56682e-25
Plekhd1	143.881	-0.486373	3.17451e-05	0.000548219		Gpr17	3201.54	1.16628	1.15708e-24	2.9973e-22		Sema3b	134.539	-0.786731	2.99774e-06	0.000696115								Lppr1	235.992	-0.327673	0.000179714	0.00208855		Mlc1	5774.51	0.640017	4.0863e-27	1.00882e-24
L3mbtl3	353.625	-0.390354	3.42367e-05	0.000585445		Cd9	1519.63	1.22309	2.50769e-24	6.40932e-22		Abca4	243.622	-0.683444	3.00108e-06	0.000696115								Zcchc5	98.6009	-0.618479	0.000180944	0.00209781		AF251705	144.666	1.68552	6.76878e-27	1.64878e-24
Ace	821.931	-0.693657	3.43779e-05	0.000587335		Gpr37l1	7117.34	0.660295	3.25679e-24	8.21439e-22		Tjp3	55.7031	-0.886847	3.17503e-06	0.000711008								Fat4	852.287	-0.443294	0.000186225	0.00214917		Cd33	196.114	1.45886	6.87562e-27	1.65277e-24
Tmem237	493.322	-0.473391	3.86161e-05	0.000652187		Pnpla7	732.384	0.75263	5.53578e-24	1.37812e-21		Sgk3	230.353	-0.628341	3.24286e-06	0.00071378								Cfap74	379.068	-0.328286	0.000196694	0.00224728		Flnc	276.795	1.80804	8.98649e-27	2.13213e-24
AK083203	433.715	-0.41329	3.99743e-05	0.000673346		Rasal3	158.942	1.45748	6.0561e-24	1.48833e-21		2021-09-10	160.477	-0.669095	3.6189e-06	0.000773481								Ppargc1b	154.185	-0.452376	0.000198462	0.00226042		Cx3cr1	1777.47	1.19608	1.48734e-26	3.48362e-24
Prr32	57.663	-0.42212	4.12972e-05	0.000691981		Aldh1l2	258.733	1.46925	6.33043e-24	1.53605e-21		Pla2g16	773.98	-0.454741	3.64111e-06	0.000773481								Trpm3	1812.17	-0.693605	0.00020256	0.00229992		Pycard	125.05	1.78446	6.95712e-26	1.60886e-23
Mest	432.221	-0.531597	4.40199e-05	0.000730247		Arpc1b	692.959	1.4472	6.82805e-24	1.63609e-21		Wfdc2	35.7172	-0.561648	3.73331e-06	0.000783951								Serpinb1b	29.2558	-0.732092	0.000213765	0.00240918		Dock2	257.303	1.61802	1.32813e-25	3.03295e-23
Serpinb1b	29.2558	-0.792717	4.56459e-05	0.000754298		Tmem176a	550.499	1.27363	8.99453e-24	2.12859e-21		Ttr	25996.9	-0.351388	4.00645e-06	0.000831749								Cfap43	118.573	-0.690173	0.000222127	0.00248549		Fcgr1	187.083	1.79032	2.6471e-25	5.97034e-23
Kcnh2	748.085	-0.432545	4.80226e-05	0.000791526		Sat1	923.331	0.894059	1.07897e-23	2.52228e-21		Antxr1	462.888	-0.643362	4.17938e-06	0.0008579								Gck	91.1319	-0.623812	0.000225439	0.00251745		B2m	2283.67	1.09399	3.20058e-25	7.13066e-23
Brwd3	197.027	-0.467659	4.81319e-05	0.000792646		S100a13	638.947	1.1735	1.25388e-23	2.89587e-21		1700007K13Rik	55.6377	-0.790937	4.26873e-06	0.000866504								Wdr78	268.719	-0.389862	0.000228573	0.00254777		Cyth4	768.435	1.02109	7.59031e-25	1.67069e-22
Tspan33	793.996	-0.479326	4.85317e-05	0.000798544		Naip2	75.5374	1.79497	1.28059e-23	2.92234e-21		Slc31a1	753.329	-0.791223	4.43744e-06	0.000888999								Kcnf1	1763.64	-0.339563	0.00022933	0.00255465		Lgals9	301.521	1.5953	1.09951e-24	2.3913e-22
Ldlr	577.035	-0.460354	5.18673e-05	0.000847609		Irf8	259.642	1.46492	1.51325e-23	3.41265e-21		Spata6	109.45	-0.699119	4.55235e-06	0.000894268								A230001M10Rik	45.3509	-0.65996	0.000232593	0.00258785		Fes	165.321	1.51108	1.19609e-24	2.57074e-22
Clic6	521.059	-0.462189	5.48354e-05	0.000891551		4632428N05Rik	935.102	0.928777	2.62566e-23	5.85248e-21		Sostdc1	183.957	-0.806875	4.75481e-06	0.000924102								Dsg2	127.875	-0.48276	0.000252805	0.00277888		P2ry6	162.282	1.57016	1.66521e-24	3.53742e-22
Ecm2	197.627	-0.584034	5.52759e-05	0.000897952		Pycard	125.05	1.67552	3.26087e-23	7.18478e-21		Fhad1	204.048	-0.730392	4.95489e-06	0.000942925								Ar	153.288	-0.446147	0.000259099	0.00284635		Arpc1b	692.959	1.46423	2.05537e-24	4.31603e-22
Dsg2	127.875	-0.531399	5.8338e-05	0.000935554		Kcnk6	147.004	1.5146	3.5307e-23	7.69092e-21		Spag16	50.5572	-0.828259	5.23188e-06	0.000985372								Zic3	39.5971	-0.652677	0.000274842	0.00299588		S100a4	212.787	1.77006	2.30563e-24	4.78653e-22
Ocln	256.641	-0.455822	5.83715e-05	0.000935554		AF251705	144.666	1.55144	3.63209e-23	7.82286e-21		Mamdc2	57.4077	-0.708345	5.53907e-06	0.00103258								Dock5	273.983	-0.529839	0.000292736	0.00315871		S100a13	638.947	1.19233	2.38796e-24	4.90176e-22
Gpc3	116.274	-0.588415	5.85434e-05	0.000936991		Aif1	235.122	1.49705	4.68734e-23	9.98352e-21		Fzd7	246.462	-0.59474	6.11387e-06	0.00112822								Mycbpap	77.4556	-0.692615	0.000302605	0.00325576		Gpam	1620.42	0.709725	3.83469e-24	7.784e-22
Cul4b	1353.28	-0.377129	5.85589e-05	0.000936991		Tsc22d4	1979.14	0.693893	7.02969e-23	1.48079e-20		Ubxn10	96.0447	-0.760826	6.58843e-06	0.00118943								Rsph1	138.484	-0.607505	0.000310693	0.00333493		S100a11	123.109	1.69288	4.84654e-24	9.72982e-22
Rdh5	150.42	-0.756928	6.42945e-05	0.00101688		S100a1	1723.15	0.80175	9.17264e-23	1.9112e-20		Epn3	125.146	-0.823219	6.77327e-06	0.00120137								Ppil6	78.9249	-0.467045	0.00031189	0.00334581		Osmr	344.125	1.67923	5.56686e-24	1.10545e-21
Cdr2	254.392	-0.671496	6.68663e-05	0.00105235		Myo1f	209.863	1.62869	1.07489e-22	2.21555e-20		Psd2	1613.08	-0.35912	6.84445e-06	0.00120232								Dbpht2	585.833	-0.37176	0.000332918	0.00354434		Tmem176a	550.499	1.2789	5.78913e-24	1.13722e-21
Scara5	26.2171	-0.730574	6.72802e-05	0.00105713		Slc43a3	106.022	1.70448	1.35381e-22	2.76076e-20		Glb1l2	41.981	-0.81102	6.99431e-06	0.00121694								Tenm1	523.843	-0.449037	0.000348705	0.00368663		Lcp1	545.241	1.58104	8.69171e-24	1.68924e-21
Krt8	27.2696	-0.702432	6.80218e-05	0.00106529		Tnfaip8l2	112.758	1.58786	1.75352e-22	3.53824e-20		Timp3	2411.05	-0.346913	7.42977e-06	0.00127136								Pip5k1b	1049.84	-0.333287	0.000350559	0.0036998		Hexb	3567.97	1.27438	1.48757e-23	2.86068e-21
Steap2	286.467	-0.750462	7.3634e-05	0.00113741		Bcl3	46.1752	1.90324	3.14174e-22	6.27334e-20		Ltc4s	155.42	-0.717135	7.44622e-06	0.00127136								Pla2g4e	211.44	-0.441853	0.000366371	0.00384007		Naip2	75.5374	1.78361	2.16856e-23	4.12682e-21
Mpp7	70.1009	-0.575465	7.59468e-05	0.00116559		S1pr3	739.671	1.63088	4.01576e-22	7.93588e-20		Iqcd	43.8811	-0.759507	7.94649e-06	0.00132937								Pcolce2	144.916	-0.646855	0.00039593	0.00411214		Dbi	3995.24	0.753731	2.5368e-23	4.77781e-21
Car12	1389.71	-0.704638	7.87877e-05	0.00120341		Fcrls	1645.44	1.65411	5.87864e-22	1.14987e-19		Krt18	69.6514	-0.694182	8.02041e-06	0.00132937								Grm2	1214.63	-0.397807	0.000455351	0.0045963		Slc43a3	106.022	1.72542	4.44829e-23	8.29243e-21
Adgra2	609.911	-0.347742	8.03024e-05	0.00122168		Nupr1	241.776	1.60178	7.72291e-22	1.49536e-19		Sh3d19	668.019	-0.482998	8.07705e-06	0.00132937								Plcxd1	174.193	-0.377055	0.000478858	0.00480674		Tmem173	187.774	1.28821	4.53123e-23	8.36173e-21
Tdo2	135.878	-0.641611	8.16899e-05	0.00123788		Cx3cr1	1777.47	1.07605	8.35134e-22	1.60087e-19		AK013627	58.8735	-0.599184	8.49365e-06	0.00135408								Kcnh2	748.085	-0.37123	0.000479455	0.00481009		Naprt	303.157	0.940665	4.77848e-23	8.7298e-21
Tgfbr3	465.424	-0.473869	8.22547e-05	0.00124447		Adamtsl3	70.1027	1.58695	2.51581e-21	4.77482e-19		Eps8l2	119.475	-0.848491	8.56308e-06	0.00135408								Lrrtm4	747.29	-0.336475	0.000525417	0.00521109		Mafb	426.571	1.17295	5.25229e-23	9.50041e-21
Cldn1	94.9171	-0.682335	8.36983e-05	0.00126137		Cd33	196.114	1.28524	2.98935e-21	5.61793e-19		Dydc2	12.0762	-0.84163	8.63181e-06	0.00135408								Elovl7	432.743	-0.567891	0.000530376	0.00525457		Cd81	7401.72	0.478967	5.35357e-23	9.58867e-21
Pcp4l1	1119.4	-0.550653	0.000101544	0.00149846		Serpinf1	568.666	1.25689	3.48337e-21	6.48278e-19		Ggh	357.056	-0.550446	8.66292e-06	0.00135408								Smim5	20.1482	-0.655562	0.0005319	0.00526682		Dhrs1	3492.98	1.47052	1.05064e-22	1.86352e-20
Sh3d19	668.019	-0.416636	0.000112338	0.00163757		Mafb	426.571	1.11938	4.43536e-21	8.17513e-19		Cfap126	97.6949	-0.798372	8.845e-06	0.00136909								Cab39l	896.968	-0.606063	0.000532534	0.00527024		Tmem119	823.911	1.01964	1.15684e-22	2.03214e-20
Wdr86	46.0915	-0.44271	0.000114899	0.00166856		Hexb	3567.97	1.19337	7.14664e-21	1.3047e-18		Slc16a9	96.2106	-0.815556	8.91796e-06	0.00136909								Flt3	202.571	-0.356141	0.000533118	0.00527031		Clu	30077.7	0.509064	1.43772e-22	2.5015e-20
Mitf	224.717	-0.505162	0.000123951	0.00178648		P2ry6	162.282	1.43327	8.65737e-21	1.5656e-18		Scube3	58.5688	-0.828411	1.0093e-05	0.00153658								Slc5a6	455.795	-0.388094	0.000550542	0.00542988		Cd9	1519.63	1.17246	1.69883e-22	2.92792e-20
Fbn1	389.868	-0.46582	0.000144169	0.00204709		Gpnmb	592.414	1.66844	8.87024e-21	1.5891e-18		Elovl7	432.743	-0.719788	1.0513e-05	0.00157814								Ecm2	197.627	-0.498787	0.000568168	0.00558657		Rab3il1	453.172	1.07385	1.99685e-22	3.38605e-20
Moxd1	152.572	-0.473546	0.00015846	0.00222579		S100a11	123.109	1.55642	9.26252e-21	1.64401e-18		Msx1	175.8	-0.844001	1.05388e-05	0.00157814								Fam160a1	210.333	-0.528194	0.000618601	0.00600171		Ptprc	165.803	1.605	2.00172e-22	3.38605e-20
Efcab1	144.124	-0.543742	0.000163197	0.00228679		Dock2	257.303	1.43609	1.17431e-20	2.06517e-18		Cpq	372.818	-0.663386	1.11296e-05	0.00162661								Cort	71.5874	-0.592331	0.000625225	0.00605312		Bcl3	46.1752	1.91024	2.35147e-22	3.9412e-20
Mroh7	244.235	-0.490063	0.000176798	0.00246296		Dbi	3995.24	0.705707	1.24333e-20	2.16668e-18		Six3	18.7033	-0.747813	1.1494e-05	0.00166654								Cyp4x1	139.585	-0.400678	0.000690724	0.00658603		Csf2rb	113.751	1.69264	2.53523e-22	4.21055e-20
Rassf8	329.305	-0.331712	0.000178531	0.00247991		Gsn	2624.64	0.970496	1.27604e-20	2.20364e-18		Slc39a4	52.6503	-0.584947	1.20727e-05	0.00173042								C030017K20Rik	57.2463	-0.593561	0.000691535	0.00659033		Gpsm3	79.3513	1.3433	3.03138e-22	4.98921e-20
Wdr78	268.719	-0.396529	0.000180371	0.00250002		H2-D1	921.809	1.21537	1.65547e-20	2.83336e-18		Tmem98	291.364	-0.661442	1.2124e-05	0.00173042								Tmem74	284.898	-0.346148	0.00069253	0.00659636		Myo1f	209.863	1.60709	3.5445e-22	5.78165e-20
Spint2	357.997	-0.694471	0.000180746	0.00250341		Lcp1	545.241	1.4478	2.50859e-20	4.2555e-18		Bsg	9318.01	-0.419315	1.38862e-05	0.00193654								Pcdhga4	243.442	-0.329736	0.000712205	0.00675559		Ddah1	3080.2	0.864459	6.17917e-22	9.99003e-20
Mycbpap	77.4556	-0.714738	0.000187569	0.00258856		Arhgap25	114.63	1.27703	2.68736e-20	4.51878e-18		Ace	821.931	-0.710306	1.4161e-05	0.0019599								Tbc1d2	140.281	-0.564623	0.000724025	0.00683576		Fcrls	1645.44	1.65126	6.80044e-22	1.0898e-19
Tspan18	995.282	-0.350578	0.00018832	0.00259519		Osmr	344.125	1.52149	3.50697e-20	5.84566e-18		Tspo	174.312	-0.671438	1.43227e-05	0.00196738								Wfikkn2	47.1516	-0.654802	0.000730332	0.00688464		Tnfaip8l2	112.758	1.55754	9.44069e-22	1.49976e-19
Pcolce2	144.916	-0.679231	0.000194224	0.00266315		Glipr2	193.901	1.61021	4.22763e-20	6.98616e-18		Rab20	19.7659	-0.677214	1.47764e-05	0.00201456								Ccdc113	53.5016	-0.629711	0.00073555	0.00691955		Arhgap25	114.63	1.31812	1.58594e-21	2.49772e-19
Cgnl1	493.05	-0.702227	0.000199114	0.00272241		Gpsm3	79.3513	1.26315	7.85983e-20	1.28774e-17		Sowahc	336.806	-0.677479	1.51881e-05	0.00204023								Nek10	43.7182	-0.559995	0.000736284	0.00692289		Siglech	481.46	0.921003	1.66068e-21	2.59308e-19
Cdon	433.631	-0.381721	0.000208284	0.00282963		Tst	823.324	0.804938	9.7957e-20	1.5913e-17		Lbp	317.542	-0.668663	1.53092e-05	0.00204149								Cyb561	1251.84	-0.379384	0.000747235	0.00699346		Aldh1l1	2537.59	1.0975	1.78048e-21	2.75657e-19
Slc16a4	64.2895	-0.672395	0.000223099	0.00300744		Gldn	144.414	1.63587	1.16342e-19	1.87408e-17		Calml4	111.232	-0.69739	1.5994e-05	0.00211735								Moxd1	152.572	-0.421052	0.000760737	0.00710043		Adap2	159.439	1.2545	2.62554e-21	4.03075e-19
Pde5a	216.186	-0.437215	0.000227222	0.00305443		Aldh1l1	2537.59	1.04249	1.55058e-19	2.47693e-17		Id1	199.249	-0.535553	1.64584e-05	0.00216315								Rai2	149.747	-0.399232	0.000762476	0.0071106		Gpr37l1	7117.34	0.615786	2.89374e-21	4.40549e-19
Lhx9	405.528	-0.382842	0.000237196	0.0031663		H19	96.6363	1.3436	1.8137e-19	2.87328e-17		Bmp7	189.183	-0.701113	1.77823e-05	0.00229853								Tgfbr3	465.424	-0.40293	0.000802687	0.0074212		Lgmn	4168.32	1.14606	3.25711e-21	4.9177e-19
BC023483	200.657	-0.425473	0.000245571	0.00326178		Timp1	194.75	0.933024	1.95096e-19	3.06541e-17		Slc16a12	60.7622	-0.804308	1.78658e-05	0.00229853								1700086L19Rik	282.136	-0.415272	0.000821159	0.00754995		Tsc22d4	1979.14	0.664977	3.87566e-21	5.80363e-19
Pdyn	259.688	-0.514155	0.000257936	0.00339819		Ifi30	292.357	1.61224	2.06401e-19	3.21666e-17		Scara5	26.2171	-0.765584	1.85156e-05	0.00234903								Shisa2	123.256	-0.476208	0.000876188	0.00799554		Ifi30	292.357	1.70097	3.95544e-21	5.87496e-19
Sfrp5	21.9007	-0.669155	0.000279057	0.00363647		B2m	2283.67	0.947437	2.57729e-19	3.9842e-17		Col18a1	150.008	-0.744515	1.91997e-05	0.0024023								Ubxn10	96.0447	-0.561654	0.000886662	0.00806694		Abhd4	2406.16	0.785869	4.44453e-21	6.54816e-19
Aff2	222.939	-0.382752	0.000298059	0.00385006		Fcgr1	187.083	1.52286	3.26486e-19	5.00672e-17		Col8a2	205.154	-0.608317	1.9233e-05	0.0024023								Frem1	178.707	-0.617012	0.000899305	0.00817297		Aldh1l2	258.733	1.36869	4.91358e-21	7.1813e-19
Cox8b	10.0437	-0.525068	0.000300982	0.00387888		Pros1	501.91	1.27443	4.34029e-19	6.6031e-17		Csrp2	126.589	-0.689764	1.98383e-05	0.00241617								Cgn	153.707	-0.506931	0.000909782	0.00823628		Serpinf2	86.1559	1.69548	5.4666e-21	7.87775e-19
C030017K20Rik	57.2463	-0.631723	0.000302658	0.00389373		Cxcl16	76.3878	1.57436	4.79419e-19	7.2362e-17		Arhgef5	102.709	-0.74731	2.00759e-05	0.00242892								Myo5c	36.9182	-0.665481	0.000916997	0.00828927		Cd53	302.004	1.49086	5.47635e-21	7.87775e-19
Cfap69	255.922	-0.436597	0.000314784	0.00403079		Clec7a	49.4622	1.6363	5.47992e-19	8.2066e-17		Ubxn11	316.156	-0.47719	2.1977e-05	0.00255731								Kirrel2	183.036	-0.43642	0.00095053	0.00853328		Cst3	27572.3	0.580375	6.79503e-21	9.69832e-19
Capn6	59.8633	-0.631027	0.000317136	0.0040555		Tmem173	187.774	1.15856	6.14041e-19	9.12446e-17		Gas6	2545	-0.459667	2.22143e-05	0.00256856								Sostdc1	183.957	-0.662903	0.000953789	0.00855413		Ccr5	104.822	1.44596	7.99389e-21	1.1321e-18
Lmx1a	19.063	-0.61364	0.000339485	0.00430112		Cst7	35.4893	1.89678	6.25738e-19	9.22675e-17		Adgra2	609.911	-0.375569	2.26176e-05	0.00259875								Gprc5c	92.6825	-0.568911	0.00100734	0.00892054		Hck	109.873	1.51481	8.53677e-21	1.19968e-18
Kcnh1	1486.43	-0.370398	0.000341804	0.00432764		Lgmn	4168.32	1.07581	6.8356e-19	1.00024e-16		Ppp1r3b	42.0515	-0.766762	2.28306e-05	0.00260683								Zfp185	111.833	-0.620812	0.00102599	0.00905501		Aif1	235.122	1.41255	9.0793e-21	1.26618e-18
Stra6	352.418	-0.560138	0.000354565	0.0044656		Csf2rb	113.751	1.53204	7.24723e-19	1.05244e-16		Wfikkn2	47.1516	-0.774104	2.29793e-05	0.00260751								Kctd16	203.344	-0.347154	0.00106431	0.00934804		Ecm1	241.513	1.37242	1.01411e-20	1.40354e-18
Otx2	117.028	-0.456931	0.00036061	0.0045226		Rab3il1	453.172	0.976865	8.50951e-19	1.22646e-16		Tbc1d2	140.281	-0.704584	2.45989e-05	0.00277406								Synpr	2476.72	-0.346913	0.00112107	0.00979473		Ifngr1	431.387	0.829947	1.0224e-20	1.40437e-18
Ooep	6.70006	-0.611007	0.000365128	0.0045746		Tfcp2l1	179.921	1.34278	8.78214e-19	1.2563e-16		Paqr5	67.5615	-0.704593	2.52552e-05	0.00281334								Tiam1	2584.02	-0.352149	0.00114427	0.00997363		Tbxas1	127.495	1.54865	1.1132e-20	1.5177e-18
Gprc5c	92.6825	-0.615723	0.000367717	0.00460102		Lyz2	1161.56	1.4858	9.4565e-19	1.34275e-16		Mia	45.8422	-0.737569	2.58125e-05	0.00283822								Tinagl1	83.3793	-0.599659	0.00114856	0.0100015		Psmb8	113.438	1.46681	1.45729e-20	1.95759e-18
Sdpr	165.83	-0.479287	0.000369976	0.00462627		Cnn3	3178.92	0.912401	9.88069e-19	1.39267e-16		Shroom3	123.723	-0.558663	2.59446e-05	0.00283822								Crb3	15.8242	-0.620119	0.00115508	0.0100476		Rgs10	690.136	0.844375	1.47648e-20	1.96889e-18
Exph5	138.593	-0.463578	0.00037532	0.00468698		Psmb8	113.438	1.3847	1.47697e-18	2.06657e-16		Lrrc48	273.95	-0.459585	2.61459e-05	0.00284322								Efcab1	144.124	-0.467526	0.00116636	0.0101323		Alox5ap	171.917	1.49196	2.06763e-20	2.73722e-18
Drc7	245.144	-0.609869	0.000398573	0.00494194		Rgs10	690.136	0.798559	1.60381e-18	2.22779e-16		Aox1	241.542	-0.545066	2.72987e-05	0.00295101								Pde5a	216.186	-0.383924	0.00117616	0.0102077		Txnip	627.229	0.85231	2.58292e-20	3.39477e-18
Lepr	61.9765	-0.65354	0.000410453	0.00507284		Igsf6	41.6356	1.66713	1.80841e-18	2.49391e-16		Agtrap	351.32	-0.459593	2.77794e-05	0.0029853								Eno4	79.5418	-0.588995	0.00119827	0.0103651		Ifitm3	397.364	1.40767	3.08032e-20	4.01959e-18
Fam47e	11.8145	-0.681669	0.000426574	0.00524502		Abhd4	2406.16	0.729401	2.30574e-18	3.15705e-16		Angptl2	112.383	-0.771065	2.86103e-05	0.00304082								Ldlr	577.035	-0.36789	0.00120322	0.0103883		Rab5c	3743.03	0.388712	4.05183e-20	5.24985e-18
Slc31a1	753.329	-0.610543	0.000450148	0.00548326		Vav1	194.284	1.451	2.47094e-18	3.35925e-16		Lrrc23	109.315	-0.769962	2.86289e-05	0.00304082								Pld5	58.6414	-0.565126	0.00122015	0.010493		Hsd3b7	257.249	0.9166	4.29186e-20	5.52169e-18
Calml4	111.232	-0.624083	0.00045024	0.00548326		Cybrd1	336.665	1.30061	2.62477e-18	3.54326e-16		Gprc5c	92.6825	-0.722342	2.9213e-05	0.00306742								Nipal2	125.648	-0.414209	0.00124496	0.010643		Cst7	35.4893	1.99622	4.77297e-20	6.09772e-18
Slc19a1	361.549	-0.375287	0.000455228	0.00552995		Ptprc	165.803	1.42777	2.88917e-18	3.8729e-16		Clic6	521.059	-0.465762	2.95533e-05	0.00308519								Pcp4l1	1119.4	-0.455843	0.00130572	0.0110966		Serpinf1	568.666	1.21861	5.03664e-20	6.38989e-18
Wnt9b	13.524	-0.625466	0.000472875	0.00570456		Clcf1	82.5991	1.56039	4.20245e-18	5.59422e-16		Ccdc114	172.941	-0.604632	2.97824e-05	0.00308759								Spag6	192.168	-0.430592	0.0013401	0.0113239		H2-D1	921.809	1.19581	6.52532e-20	8.22146e-18
Kirrel2	183.036	-0.459743	0.000503205	0.00601743		Abca1	1826.01	1.02705	4.67163e-18	6.1759e-16		Atp11c	354.478	-0.500312	2.99142e-05	0.00308759								Tmem237	493.322	-0.368159	0.00134639	0.0113561		Sash3	106.798	1.44902	6.64203e-20	8.31118e-18
Magee2	260.662	-0.40065	0.000508188	0.00606567		Lgals9	301.521	1.33913	4.74563e-18	6.23075e-16		Btd	299.899	-0.429141	3.09504e-05	0.00317659								Cfap53	15.426	-0.590925	0.0014082	0.0117795		Iqgap3	84.2232	1.63591	7.67875e-20	9.47526e-18
Csrp2	126.589	-0.560806	0.000512909	0.0061068		Iqgap3	84.2232	1.52482	5.04065e-18	6.57308e-16		1700003M02Rik	60.1327	-0.786105	3.30379e-05	0.00337189								Tunar	438.916	-0.335015	0.00143192	0.0119396		S1pr3	739.671	1.53128	7.6831e-20	9.47526e-18
Arhgef5	102.709	-0.607356	0.000568852	0.00668566		Thbs4	914.617	1.47867	5.2417e-18	6.78907e-16		Myl12a	534.957	-0.422847	3.43446e-05	0.00346652								Cd55	167.534	-0.456541	0.00145002	0.0120411		Apobec3	130.222	1.4914	7.72792e-20	9.47526e-18
Fndc1	263.505	-0.373603	0.000571905	0.00671332		Ccr5	104.822	1.33188	5.67411e-18	7.2998e-16		Arsg	556.409	-0.546817	3.495e-05	0.00350825								Ubxn11	316.156	-0.353982	0.00150337	0.0124389		Clcf1	82.5991	1.65231	1.07389e-19	1.30792e-17
Atp7a	265.567	-0.493744	0.000585677	0.00684982		Akr1b8	68.3883	1.57403	7.62071e-18	9.73876e-16		Naga	604.965	-0.372114	3.62321e-05	0.00358207								Mitf	224.717	-0.416154	0.00153703	0.0126601		Tifab	138.619	1.36074	1.26485e-19	1.5303e-17
Scube3	58.5688	-0.674328	0.000602652	0.00702264		Fes	165.321	1.26351	8.31437e-18	1.05548e-15		Klhdc7a	588.062	-0.460724	3.62717e-05	0.00358207								F730043M19Rik	653.712	-0.3274	0.00155003	0.0127384		Adamtsl3	70.1027	1.50556	1.62066e-19	1.94789e-17
Crb3	15.8242	-0.644447	0.000609869	0.0070981		Atp1b2	16453.5	0.732649	9.13665e-18	1.15224e-15		Rom1	148.536	-0.539337	3.64663e-05	0.00358207								Kctd4	1265.19	-0.371489	0.00157536	0.0129001		Cxcl16	76.3878	1.59278	1.98271e-19	2.36746e-17
Dydc2	12.0762	-0.672112	0.000613448	0.0071311		Prex1	3682.09	0.416636	9.84805e-18	1.23384e-15		St6galnac2	95.4275	-0.781109	3.64697e-05	0.00358207								Sh3d19	668.019	-0.34002	0.00160143	0.0130647		Tlr2	94.4534	1.66599	2.12045e-19	2.51549e-17
Gnmt	17.1671	-0.650348	0.000635205	0.00734394		Cd53	302.004	1.34805	1.4737e-17	1.83438e-15		Tmem237	493.322	-0.475931	3.68465e-05	0.00359973								Kcna4	666.1	-0.344842	0.0016028	0.0130647		Irf5	142.788	1.24124	2.22605e-19	2.62372e-17
Angptl2	112.383	-0.655698	0.000653345	0.00753095		Nfam1	121.309	1.19807	1.62437e-17	2.00888e-15		Cox6b2	57.4333	-0.699553	3.9993e-05	0.00388634								Cntnap5b	217.914	-0.460835	0.00160316	0.0130647		Hvcn1	134.748	1.41368	2.34106e-19	2.7416e-17
Cort	71.5874	-0.587694	0.000696928	0.00795204		Cotl1	2775.28	0.640124	1.74003e-17	2.13812e-15		Steap2	286.467	-0.773196	4.17657e-05	0.00401588								Dusp4	365.593	-0.404694	0.0016248	0.0132102		Tlr7	142.19	1.53327	2.54185e-19	2.95777e-17
Cyb561	1251.84	-0.381492	0.000699242	0.00797369		Ddr1	2744.4	0.619872	2.45478e-17	2.99717e-15		Nek11	53.3153	-0.690718	4.2398e-05	0.00405534								Etv4	283.055	-0.328579	0.00165678	0.0134106		Abi3	201.482	1.25163	3.27668e-19	3.78871e-17
Etv4	283.055	-0.354329	0.000706111	0.00802814		Abi3	201.482	1.18142	2.7446e-17	3.32983e-15		Fbxo36	69.0529	-0.613116	4.67822e-05	0.00442831								Ak8	50.1686	-0.56996	0.00171707	0.0138293		Vav1	194.284	1.4894	3.44652e-19	3.96003e-17
Stk32b	229.252	-0.399479	0.000712021	0.00809053		1700084C01Rik	578.9	0.69498	3.09987e-17	3.73719e-15		Otx2	117.028	-0.474032	4.96411e-05	0.00464427								Dgkh	461.234	-0.494339	0.00172267	0.0138641		Pik3ap1	130.298	1.59413	3.77366e-19	4.30881e-17
Pih1d2	44.4289	-0.543708	0.000731272	0.00826518		Gna15	66.6461	1.3837	3.20967e-17	3.84538e-15		Smim5	20.1482	-0.741089	5.0208e-05	0.00464427								Upp2	270.041	-0.335452	0.0017724	0.0142142		Plcd4	794.546	0.998683	3.96867e-19	4.50333e-17
Fhad1	204.048	-0.54054	0.000736592	0.00830084		Cela1	76.7105	1.27977	3.55131e-17	4.22826e-15		Prrg4	21.1682	-0.732111	5.08419e-05	0.00466749								Trpc6	423.828	-0.380676	0.001912	0.0151148		Tnfrsf1b	198.144	1.39871	5.1662e-19	5.82428e-17
Flt3	202.571	-0.346357	0.000754847	0.0084717		Ddah1	3080.2	0.755093	4.2432e-17	5.02086e-15		Dnaaf3	59.8294	-0.715415	5.25149e-05	0.00477311								Tbc1d8b	408.041	-0.356779	0.00196475	0.0154383		Hcls1	218.678	1.3724	5.19655e-19	5.82428e-17
Dmpk	456.063	-0.386942	0.000757227	0.00849344		Asap3	260.828	1.14235	4.79504e-17	5.63903e-15		Plek2	9.20843	-0.678001	5.3356e-05	0.00482555								Gabrd	496.144	-0.401333	0.00198955	0.0155795		Lyn	348.535	1.30895	5.5786e-19	6.21435e-17
BC021891	74.2958	-0.507107	0.000781195	0.0087113		Havcr2	139.495	1.32671	4.83013e-17	5.64565e-15		Serpinh1	563.958	-0.538521	5.41939e-05	0.00487718								Spag16	50.5572	-0.607964	0.00200071	0.0156468		Timp1	194.75	0.891897	7.38538e-19	8.17718e-17
Cgn	153.707	-0.513146	0.000790171	0.00879666		Gusb	657.358	1.23003	5.68017e-17	6.58271e-15		Efs	424.746	-0.515156	5.5132e-05	0.0049324								Pls1	231.557	-0.430257	0.00200686	0.0156815		Ikzf1	150.417	1.45543	7.53686e-19	8.29464e-17
Col8a2	205.154	-0.547168	0.000790685	0.00879666		Tbxas1	127.495	1.38105	5.70051e-17	6.58271e-15		Kif9	181.837	-0.59983	5.56174e-05	0.0049324								AK140632	433.083	-0.327655	0.00204746	0.0159646		C3ar1	183.085	1.56468	7.84116e-19	8.56672e-17
Mrap2	90.8565	-0.522633	0.000801211	0.00889311		Pik3ap1	130.298	1.46606	9.68027e-17	1.11114e-14		Slc37a2	176.039	-0.669302	5.67206e-05	0.00498187								Tmem232	23.4278	-0.567693	0.00205546	0.0160201		Cd14	90.623	1.49157	7.88108e-19	8.56672e-17
Sgms2	90.1247	-0.619903	0.00083849	0.009248		Lcn2	328.804	0.764234	1.02297e-16	1.16722e-14		Cpn1	12.9018	-0.593938	5.70338e-05	0.00498541								Pcsk1	293.877	-0.342944	0.00208249	0.0161927		Pros1	501.91	1.26453	7.92476e-19	8.56672e-17
Slc22a8	267.256	-0.547758	0.000863333	0.00946942		Necap2	898.872	0.708117	1.05354e-16	1.19499e-14		Pqlc3	32.5911	-0.638937	5.73157e-05	0.00498619								Nek5	39.5768	-0.607945	0.0021338	0.016532		Klk6	232.671	1.34602	8.0478e-19	8.64854e-17
Ubxn11	316.156	-0.371885	0.000863506	0.00946942		Cd180	170.973	1.47901	1.0667e-16	1.2028e-14		Acss3	27.2749	-0.744236	5.80119e-05	0.00499915								Ankrd63	563.921	-0.374553	0.00215172	0.0166214		Ptpn6	205.666	1.42568	1.00949e-18	1.07851e-16
Pla2g5	57.7365	-0.658262	0.000875224	0.00956248		Arhgap30	153.187	1.23414	1.1109e-16	1.24532e-14		Dnaic2	109.734	-0.608336	6.06733e-05	0.00520395								Fam84b	435.557	-0.537587	0.00219519	0.016893		Gpnmb	592.414	1.5535	1.06191e-18	1.12791e-16
Slc13a4	283.818	-0.578806	0.000875484	0.00956248		H2-K1	771.307	1.05054	1.34465e-16	1.49858e-14		Cryab	2183.45	-0.370314	6.11469e-05	0.00522006								4930529M08Rik	23.85	-0.596664	0.00221643	0.0170451		Necap2	898.872	0.752356	1.09698e-18	1.15842e-16
Six3	18.7033	-0.634894	0.000895127	0.00972715		C3ar1	183.085	1.42647	1.37903e-16	1.52801e-14		Ucp2	1034.33	-0.63449	6.66312e-05	0.00563558								6820431F20Rik	131.22	-0.554845	0.0022265	0.0170955		Socs3	167.85	1.59438	1.11246e-18	1.16802e-16
Sema3b	134.539	-0.624111	0.000938209	0.0101493		Ifitm3	397.364	1.25903	1.41103e-16	1.55448e-14		Ephx1	829.575	-0.471236	6.86875e-05	0.00578273								Msx1	175.8	-0.618536	0.00225834	0.0172843		Ms4a6c	79.9858	1.55059	1.25779e-18	1.31307e-16
Slc16a9	96.2106	-0.620308	0.000973827	0.0104228		Tmem119	823.911	0.860556	1.45258e-16	1.58269e-14		Lepr	61.9765	-0.70777	7.27668e-05	0.00604262								Sema3f	103.953	-0.55449	0.00226055	0.017294		Lyz2	1161.56	1.47645	1.34477e-18	1.39382e-16
Tbc1d8b	408.041	-0.3804	0.000975758	0.0104377		Galnt15	57.6046	1.49448	1.45315e-16	1.58269e-14		Fam161a	115.363	-0.634366	7.50742e-05	0.00620602								Chst9	88.6148	-0.431125	0.00228672	0.0174267		Cnn3	3178.92	0.908737	1.35041e-18	1.39382e-16
Foxq1	52.3108	-0.505294	0.000994806	0.0106		Ms4a6c	79.9858	1.41104	1.47e-16	1.592e-14		Iqcg	122.828	-0.56823	7.54636e-05	0.00621011								Mlf1	43.6994	-0.584368	0.00231645	0.017611		Sall1	735.391	0.778211	1.5504e-18	1.59125e-16
Fras1	613.854	-0.393308	0.00110854	0.0116126		Alox5ap	171.917	1.32284	1.58583e-16	1.7078e-14		Drc7	245.144	-0.647586	7.64057e-05	0.00625944								Cfap61	40.2739	-0.525495	0.002366	0.0178835		Phyhd1	509.059	0.715685	2.15964e-18	2.20416e-16
Cdh9	876.276	-0.363967	0.00112404	0.0117485		Sdc4	2249.8	0.913315	1.73116e-16	1.85389e-14		Kl	1340.24	-0.703934	8.15976e-05	0.00653819								Epn3	125.146	-0.623136	0.00237239	0.0179244		Fam107a	13809.6	0.578793	2.33353e-18	2.36841e-16
Abhd2	1055.09	-0.401019	0.00116843	0.0121397		Pdlim4	346.042	1.06257	1.80994e-16	1.92749e-14		Smpdl3a	768.215	-0.374179	8.36412e-05	0.00664667								Chst15	1052.71	-0.333662	0.00237829	0.0179541		Ncf2	120.393	1.40098	2.44803e-18	2.47089e-16
Tcea3	19.1404	-0.637443	0.00120988	0.012516		Gal3st4	159.113	1.25226	2.0592e-16	2.18082e-14		Pltp	1098.11	-0.641408	8.36791e-05	0.00664667								Grm8	146.359	-0.442463	0.0023802	0.0179611		Sdc4	2249.8	0.966871	2.72418e-18	2.73451e-16
Acad8	729.113	-0.368757	0.00121111	0.012522		Cyba	226.967	1.36921	2.10314e-16	2.21512e-14		Tuft1	93.3077	-0.58511	8.81323e-05	0.00697009								Jph1	913.722	-0.389634	0.00247867	0.0185738		Glipr2	193.901	1.51899	2.93672e-18	2.93174e-16
Cdc14b	251.583	-0.36893	0.00123953	0.0127951		Arhgap9	44.1993	1.49842	2.68703e-16	2.81462e-14		Tnfaip8	198.459	-0.643928	9.14984e-05	0.00713149								Ctxn3	37.8378	-0.377299	0.00256504	0.0190957		Nfam1	121.309	1.22468	3.0241e-18	3.00257e-16
Ppp1r1b	1282.64	-0.574788	0.00125014	0.0128839		Hcls1	218.678	1.25549	3.15412e-16	3.26818e-14		Slc25a13	59.3934	-0.604997	9.20061e-05	0.00713149								Esrrb	53.3053	-0.530383	0.00258114	0.0191859		Stab1	945.364	1.48007	3.08009e-18	3.04163e-16
Cd55	167.534	-0.462622	0.00125996	0.0129711		Tnfrsf1a	462.461	1.2088	3.26582e-16	3.36573e-14		1700088E04Rik	130.219	-0.479878	9.2125e-05	0.00713149								Cntn5	87.9352	-0.45427	0.00259083	0.0192406		Ifi204	50.7858	1.59586	3.39268e-18	3.3046e-16
Synpr	2476.72	-0.342907	0.00128025	0.0131447		Fkbp10	336.706	0.924884	3.34439e-16	3.42827e-14		Slc16a4	64.2895	-0.711879	9.31798e-05	0.00718271								Tmem117	141.174	-0.357882	0.00261184	0.0193494		Pik3cg	140.042	1.30904	3.40065e-18	3.3046e-16
Iqcd	43.8811	-0.539905	0.00136252	0.0138338		Tmem176b	1186.22	1.02341	3.44458e-16	3.51219e-14		Ooep	6.70006	-0.649475	9.37897e-05	0.00719935								Scube3	58.5688	-0.602335	0.00263144	0.0194552		Cd72	51.3512	1.53455	3.9058e-18	3.7754e-16
Six5	71.2737	-0.512441	0.00136533	0.013855		Cd72	51.3512	1.37606	3.66803e-16	3.72023e-14		Baiap2l1	40.3908	-0.662563	0.000101167	0.00766893								Mycn	144.086	-0.354254	0.00268995	0.0198236		Tnfrsf1a	462.461	1.28167	5.29452e-18	5.09082e-16
Tekt1	98.7828	-0.555591	0.00138026	0.0139769		Ikzf1	150.417	1.33174	3.71659e-16	3.74965e-14		Prr32	57.663	-0.417412	0.000102064	0.00770502								AK140725	244.873	-0.354886	0.00277476	0.0203501		Arhgap30	153.187	1.2854	6.06833e-18	5.80431e-16
Fzd4	190.061	-0.522037	0.00146901	0.0147431		Ptpn6	205.666	1.31043	3.78037e-16	3.79402e-14		4833427G06Rik	13.9682	-0.679692	0.00010532	0.00785344								Npr1	167.268	-0.452222	0.00282325	0.0206606		Thbs4	914.617	1.47518	6.18124e-18	5.88152e-16
Baiap3	311.648	-0.525075	0.00147139	0.0147594		Arl11	37.7575	1.5446	3.91245e-16	3.90613e-14		Sorbs3	896.179	-0.396172	0.000105998	0.00787186								Slc2a12	210.525	-0.615541	0.00282389	0.0206606		Clec7a	49.4622	1.557	6.24917e-18	5.91534e-16
Col18a1	150.008	-0.559414	0.001477	0.0148001		Mt3	6623.24	0.447504	4.20228e-16	4.17375e-14		Frem1	178.707	-0.715653	0.000107158	0.00792579								Ttll6	34.1316	-0.547973	0.00290871	0.0211879		Nupr1	241.776	1.42151	9.31462e-18	8.77159e-16
Rai2	149.747	-0.376709	0.0014855	0.0148469		Plcd4	794.546	0.906277	5.15565e-16	5.09426e-14		Epha1	7.8726	-0.671771	0.000110168	0.00811555								AK053225	13.7326	-0.560784	0.00306042	0.0221166		Lair1	255.103	1.22069	9.83789e-18	9.21684e-16
Ccdc24	36.8955	-0.592012	0.00148631	0.0148469		Pik3cg	140.042	1.21378	6.81553e-16	6.69984e-14		Ccdc113	53.5016	-0.71725	0.000113018	0.00824071								Lrrc23	109.315	-0.558877	0.00310326	0.0223856		Tmem176b	1186.22	1.07337	1.19133e-17	1.11043e-15
Dlec1	111.32	-0.49297	0.00151907	0.0151032		Apobec3	130.222	1.31073	7.67706e-16	7.50824e-14		Gm11744	71.8063	-0.632765	0.00011322	0.00824071								Htr2c	1161.49	-0.535866	0.00314327	0.0226044		Hacd4	73.518	1.4318	1.31019e-17	1.20966e-15
BC083502	105.229	-0.367268	0.00154434	0.0152911		Lyn	348.535	1.18318	7.76692e-16	7.55757e-14		Rab11fip1	72.4069	-0.726038	0.000114434	0.00824893								AK141794	159.388	-0.346049	0.00317648	0.0227999		Cotl1	2775.28	0.6425	1.31104e-17	1.20966e-15
Col14a1	42.4601	-0.594344	0.00155855	0.0153999		Neu4	393.516	0.800752	8.19552e-16	7.93434e-14		Igfbp2	1830.82	-0.493274	0.000115334	0.00824893								Ocln	256.641	-0.333165	0.00317743	0.0227999		Akr1b8	68.3883	1.55748	1.39613e-17	1.2817e-15
AK048060	54.1963	-0.465838	0.00169841	0.0165937		Socs3	167.85	1.41551	8.36268e-16	8.05549e-14		Cpt1a	962.855	-0.439918	0.000115434	0.00824893								Clcn1	52.5623	-0.472178	0.00324854	0.0232189		H19	96.6363	1.19697	1.84304e-17	1.68353e-15
Iqub	71.1024	-0.580627	0.00173159	0.0168577		Slc25a45	127.403	1.06772	1.0188e-15	9.76467e-14		Cgnl1	493.05	-0.721943	0.000115623	0.00824893								Htr1d	5.04149	-0.509671	0.00325268	0.0232228		Cd180	170.973	1.51601	2.23483e-17	2.03125e-15
Stc1	112.133	-0.420004	0.00176245	0.017106		Lair1	255.103	1.13811	1.24245e-15	1.1849e-13		Mlf1	43.6994	-0.714122	0.000115954	0.00824893								Dazl	76.9083	-0.396021	0.00330568	0.0235261		Wdfy4	132.303	1.38528	2.67772e-17	2.42175e-15
Kctd4	1265.19	-0.367578	0.00176667	0.0171297		Itpr2	936.656	0.670193	1.35738e-15	1.2881e-13		Rsph4a	164.421	-0.627176	0.000116944	0.00824893								Zdbf2	488.38	-0.333761	0.00339289	0.0240998		Gbp2	167.067	1.40619	2.89589e-17	2.60616e-15
Inadl	178.247	-0.434434	0.00179764	0.0173947		Sall1	735.391	0.708477	1.37446e-15	1.29788e-13		A330048O09Rik	43.7951	-0.613145	0.000117327	0.00824893								Rfx3	2087.23	-0.361293	0.00344274	0.0244064		Cd68	666.864	1.5031	3.21771e-17	2.88159e-15
AK079777	33.1282	-0.534967	0.00183589	0.0176845		Fcgr4	37.0011	1.45797	1.46755e-15	1.37257e-13		Npc2	1843.8	-0.383899	0.000117587	0.00824893								Capn6	59.8633	-0.51321	0.00350908	0.0247806		Havcr2	139.495	1.33361	3.32853e-17	2.96628e-15
Dock6	493.647	-0.383457	0.00195613	0.0186275		Ecm1	241.513	1.17047	1.46787e-15	1.37257e-13		Gpx3	184.085	-0.554723	0.000117848	0.00824893								Cfap70	63.7052	-0.529686	0.00354362	0.0249479		D17H6S56E-5	188.325	1.49623	3.64364e-17	3.23134e-15
Prelp	958.531	-0.528131	0.00198118	0.0187913		Anxa5	1339.53	0.84303	1.49834e-15	1.39425e-13		Atp7a	265.567	-0.553594	0.000119843	0.0083459								AA474331	52.047	-0.453379	0.00357187	0.0251076		Ms4a6d	75.368	1.52302	4.16531e-17	3.67614e-15
Paqr5	67.5615	-0.514913	0.00202227	0.0191084		AB347501	47.1252	1.48005	1.95268e-15	1.79956e-13		Crb3	15.8242	-0.697763	0.000120303	0.0083459								Wnt9b	13.524	-0.537567	0.00360343	0.0252849		Asap3	260.828	1.14395	4.2317e-17	3.71678e-15
Clec18a	96.4123	-0.525406	0.00204737	0.0193235		Cd84	139.294	1.40326	2.18004e-15	1.99948e-13		Tinagl1	83.3793	-0.706478	0.000120604	0.0083459								Armc3	32.4612	-0.546807	0.00362862	0.0254282		1700084C01Rik	578.9	0.691566	4.31706e-17	3.77361e-15
Elovl7	432.743	-0.505637	0.00207733	0.0195485		Gbp2	167.067	1.3118	2.60432e-15	2.37724e-13		Myo5c	36.9182	-0.751757	0.0001256	0.00865882								Ccdc146	41.6402	-0.553255	0.0036691	0.0256507		Atp1b2	16453.5	0.717033	4.40635e-17	3.83331e-15
Esrrb	53.3053	-0.541401	0.00208891	0.0196382		Sash3	106.798	1.24822	2.63171e-15	2.39086e-13		Iqub	71.1024	-0.70442	0.000126297	0.00867417								Ryr1	843.892	-0.385679	0.00367832	0.025678		Pik3r5	105.533	1.21935	4.51742e-17	3.91132e-15
Vwa5b1	71.7088	-0.593832	0.00211849	0.0198579		Card9	77.1312	1.24786	2.73718e-15	2.47495e-13		Sema3f	103.953	-0.689983	0.000127224	0.00870507								Prlr	343.481	-0.597537	0.00378693	0.0262927		H2-K1	771.307	1.06604	4.7615e-17	4.1032e-15
Zfp811	229.058	-0.322822	0.00212992	0.0199218		Hck	109.873	1.26863	2.99508e-15	2.69543e-13		Hfe	203.583	-0.585526	0.000129108	0.00880104								Ccp110	1691.21	-0.342905	0.0037955	0.0263196		Lcn2	328.804	0.784575	5.20297e-17	4.46259e-15
Lhb	7.83752	-0.503685	0.00213259	0.0199316		Tlr7	142.19	1.33332	3.02609e-15	2.71061e-13		Pcp4l1	1119.4	-0.54182	0.000132552	0.00900218								1500015L24Rik	8.84775	-0.479748	0.00379616	0.0263196		Gal3st4	159.113	1.27553	5.73691e-17	4.89755e-15
Hspg2	266.451	-0.516218	0.00217677	0.0202753		AI506816	265.458	1.35458	3.05528e-15	2.72403e-13		Slc38a3	2368.39	-0.45716	0.000137663	0.00931467								Cyp4f15	329.135	-0.396396	0.00380557	0.0263748		Lims2	289.689	0.785809	6.29349e-17	5.34771e-15
Slc4a2	1244.63	-0.569701	0.00229572	0.0211876		Axl	1887	0.658023	3.11618e-15	2.76546e-13		Fam47e	11.8145	-0.730538	0.000138895	0.00936339								Gucy2e	139.359	-0.367685	0.003827	0.0264831		Igsf6	41.6356	1.56854	6.61056e-17	5.59113e-15
Col9a3	830.334	-0.601409	0.00232076	0.0214084		Ifngr1	431.387	0.703538	3.19165e-15	2.81939e-13		Mxra8	241.147	-0.513682	0.000140966	0.0094334								Postn	60.6926	-0.543205	0.00387492	0.0267438		Slc25a45	127.403	1.10794	7.98621e-17	6.72351e-15
Htr2c	1161.49	-0.549889	0.0024151	0.0221494		Stab1	945.364	1.32321	4.5105e-15	3.96613e-13		Ccdc102a	53.6008	-0.639272	0.000140967	0.0094334								Tjp3	55.7031	-0.570935	0.00397747	0.027338		Cela1	76.7105	1.26199	9.09621e-17	7.62288e-15
Cfap44	299.247	-0.441426	0.00243319	0.0222846		Cd14	90.623	1.30727	4.91135e-15	4.29889e-13		Slc13a4	283.818	-0.623706	0.000145865	0.00969019								Krt18	69.6514	-0.554832	0.00398796	0.0273859		Wasf2	456.133	0.734989	9.37687e-17	7.82219e-15
Adcy4	64.1861	-0.473803	0.0024482	0.0223687		Tlr2	94.4534	1.41049	5.03177e-15	4.38427e-13		Ctnna1	1820.29	-0.340105	0.000150639	0.00989935								Hydin	106.781	-0.526308	0.00411252	0.0280342		Gusb	657.358	1.21801	1.11283e-16	9.24107e-15
Wfikkn2	47.1516	-0.601746	0.00247103	0.022513		Irf5	142.788	1.07897	5.12498e-15	4.44528e-13		Lipe	254.492	-0.41328	0.000158375	0.0102245								AK078239	15.2072	-0.572949	0.004217	0.0285864		Abca1	1826.01	0.980906	1.29752e-16	1.07259e-14
Slc38a11	24.1133	-0.54799	0.00251978	0.0228809		Was	62.1716	1.29528	5.15015e-15	4.44699e-13		Hspb8	634.693	-0.470021	0.000158567	0.0102245								Cngb1	14.2848	-0.51176	0.00433262	0.0291969		Neu4	393.516	0.821474	1.38979e-16	1.1437e-14
Aph1c	268.855	-0.354455	0.00255852	0.0231559		S100a16	1925.95	0.941148	6.1923e-15	5.32288e-13		Serpinb1b	29.2558	-0.746369	0.000159531	0.0102262								Alpl	183.827	-0.450339	0.00440538	0.0296012		Tcirg1	583.669	0.951902	1.69828e-16	1.39129e-14
Ttc39a	41.9842	-0.521872	0.00265646	0.0239294		Syk	191.939	1.10088	6.25697e-15	5.35446e-13		Cpt2	205.189	-0.546575	0.000161425	0.0102755								Wdr63	37.7791	-0.525765	0.00450384	0.0301505		Gna15	66.6461	1.34845	1.74252e-16	1.42116e-14
Acaa2	570.614	-0.336856	0.00273846	0.0245642		Gltp	981.926	0.855446	6.57186e-15	5.59893e-13		Ltbp3	982.753	-0.467132	0.000162757	0.0103244								Cfap44	299.247	-0.412963	0.00456107	0.0304851		Fcgr4	37.0011	1.53767	1.78217e-16	1.44704e-14
Adgrf4	75.8796	-0.425821	0.00276005	0.0247231		D17H6S56E-5	188.325	1.35062	7.09457e-15	6.01751e-13		Ppfibp2	271.923	-0.552524	0.000163415	0.0103302								Slc16a12	60.7622	-0.543356	0.00461729	0.0307522		Cd84	139.294	1.46369	1.84046e-16	1.48776e-14
Fgd5	138.514	-0.357492	0.00287513	0.0256341		Txnip	627.229	0.719611	7.28135e-15	6.14873e-13		Arhgef16	12.7272	-0.651508	0.000169098	0.0105826								2310015A10Rik	228.325	-0.326318	0.00466036	0.0309826		Cybrd1	336.665	1.22432	1.9304e-16	1.55082e-14
BC039981	108.528	-0.353618	0.00293145	0.0260394		Adcy7	191.233	1.09855	7.67526e-15	6.45294e-13		Myof	236.818	-0.595075	0.000169145	0.0105826								Klhl4	203.088	-0.378515	0.00471328	0.0312775		Adcy7	191.233	1.16283	1.93651e-16	1.55082e-14
Nup62cl	4.92148	-0.461574	0.00308482	0.0272126		Chrdl1	171.114	1.25269	8.50989e-15	7.10321e-13		Cd164	1489.62	-0.340318	0.000172491	0.0107185								Calml4	111.232	-0.544356	0.00472119	0.0313073		Entpd1	365.828	0.841885	2.02309e-16	1.60695e-14
Rd3l	3.47924	-0.338669	0.00313692	0.0276086		Gja1	6634.41	0.685078	8.52282e-15	7.10321e-13		Car14	296.944	-0.693798	0.0001768	0.0108813								Iqcd	43.8811	-0.47581	0.00473074	0.0313478		Itgb5	1947.76	0.920921	2.03452e-16	1.60903e-14
Fam160a1	210.333	-0.455336	0.00320782	0.0281165		Tnfrsf1b	198.144	1.21121	9.45208e-15	7.84229e-13		Katnal2	170.387	-0.414709	0.000176897	0.0108813								Foxp2	36.1894	-0.516032	0.00477841	0.0315535		Slc11a1	103.708	1.40211	2.24649e-16	1.76142e-14
Nek5	39.5768	-0.58498	0.00326913	0.0284846		Cd81	7401.72	0.376055	9.49143e-15	7.84229e-13		Aldh2	2077.65	-0.350632	0.000180355	0.0110568								Car12	1389.71	-0.51066	0.00477906	0.0315535		Scara3	1045.71	0.753104	2.9119e-16	2.2734e-14
Zap70	133.172	-0.398858	0.00330022	0.0286772		Ppp1r18	323.411	1.02687	1.04783e-14	8.62055e-13		Ccnd3	722.426	-0.387135	0.000183974	0.0112409								Kl	1340.24	-0.56408	0.0049606	0.0324241		Scamp2	792.674	0.703753	3.23013e-16	2.51111e-14
Car14	296.944	-0.550144	0.00347073	0.0298476		Cd68	666.864	1.36224	1.06819e-14	8.75051e-13		Fkbp9	1316.3	-0.348572	0.000187129	0.0113955								Kcng1	686.177	-0.334951	0.00497961	0.032525		Csf1	974.179	0.848339	3.74183e-16	2.89659e-14
Mycn	144.086	-0.34465	0.00350071	0.0300467		Cadm4	4522.27	0.582177	1.16426e-14	9.49692e-13		Limd1	315.709	-0.384542	0.000191623	0.0116304								Dsp	1038.91	-0.49638	0.00498838	0.0325706		Cyba	226.967	1.35471	4.11329e-16	3.17071e-14
4930529M08Rik	23.85	-0.572808	0.00357363	0.0304593		Siglech	481.46	0.746663	1.39781e-14	1.13536e-12		Vwa5b1	71.7088	-0.708569	0.000203517	0.0123114								Inadl	178.247	-0.389577	0.00508057	0.0330898		Nfe2l2	574.008	0.914247	4.89409e-16	3.75673e-14
Kif27	100.336	-0.469614	0.00359652	0.0306408		Abcc3	123.966	1.25293	1.60308e-14	1.2966e-12		Pdpn	528.504	-0.519557	0.000211167	0.0126902								Sfrp5	21.9007	-0.561964	0.00513515	0.0333739		Aldh3b1	187.641	0.874139	5.16303e-16	3.94658e-14
Ccdc113	53.5016	-0.54704	0.00361754	0.0307515		Clic1	425.198	1.18111	1.88556e-14	1.51867e-12		Erich2	23.9279	-0.667032	0.000212803	0.0127308								Steap2	286.467	-0.545005	0.00515833	0.0335126		AI506816	265.458	1.39283	5.57274e-16	4.24202e-14
Zfp57	281.628	-0.337337	0.00368696	0.0312861		Tspan4	367.612	0.962123	2.57013e-14	2.06137e-12		Clic3	10.51	-0.599186	0.000213238	0.0127308								Nt5e	93.1962	-0.36546	0.00529783	0.0342823		Abca9	263.547	0.873501	5.90533e-16	4.47654e-14
Lbp	317.542	-0.531137	0.00374625	0.031719		Itgb5	1947.76	0.851955	2.85552e-14	2.28072e-12		Mitf	224.717	-0.488925	0.000214735	0.0127785								Drd2	46.613	-0.483227	0.00538486	0.0346639		Cmklr1	134.479	1.18901	7.40596e-16	5.59089e-14
Mecom	37.3541	-0.517787	0.00408975	0.0341448		Cbs	1086.94	0.522789	2.88652e-14	2.29592e-12		Sgms2	90.1247	-0.670158	0.000216345	0.0128325								Dlec1	111.32	-0.43236	0.00540217	0.0347263		Ctsa	3390.56	0.619025	7.94498e-16	5.97312e-14
Nid2	153.416	-0.538471	0.00412834	0.0343622		Tifab	138.619	1.13528	3.3414e-14	2.64675e-12		Foxj1	395.596	-0.639494	0.00021944	0.0128568								Cdh18	181.438	-0.334105	0.00550553	0.0352419		Arhgap9	44.1993	1.47017	7.99156e-16	5.98351e-14
Hemk1	403.21	-0.340392	0.00430632	0.0355176		Ctsd	22421.9	1.20256	3.42054e-14	2.69828e-12		Rhod	32.4791	-0.60188	0.000219575	0.0128568								Kdr	269.519	-0.399715	0.00556121	0.0354833		Mgst1	244.213	0.872829	8.37505e-16	6.24505e-14
Ranbp3l	98.9581	-0.433596	0.00430791	0.0355176		Plod1	892.408	0.788547	3.85405e-14	3.0278e-12		Slc22a18	13.6393	-0.624724	0.000219912	0.0128568								E230008N13Rik	40.8778	-0.485685	0.00556146	0.0354833		Slc15a3	119.792	1.39122	8.44188e-16	6.2693e-14
Kif9	181.837	-0.423343	0.00432904	0.0356764		S100a10	492.346	1.09604	3.9397e-14	3.08245e-12		Ttc12	107.817	-0.544602	0.000220274	0.0128568								Tmem163	214.341	-0.355057	0.00562063	0.0357212		Tst	823.324	0.710796	1.05748e-15	7.82148e-14
Pltp	1098.11	-0.464928	0.00457338	0.0373369		Hepacam	2948.14	0.623661	4.03343e-14	3.14296e-12		P3h4	275.406	-0.345127	0.000229012	0.0131154								Kif27	100.336	-0.446524	0.00562146	0.0357212		Rab32	129.782	1.39153	1.15682e-15	8.52175e-14
A530058N18Rik	66.729	-0.429711	0.0045907	0.0374146		Cst3	27572.3	0.467626	4.20989e-14	3.26718e-12		Dnali1	84.5856	-0.658231	0.00024928	0.0141872								Zmynd10	110.693	-0.388894	0.00570647	0.0361483		Ppp1r18	323.411	1.06274	1.20275e-15	8.82451e-14
Chia1	50.9261	-0.481741	0.00463313	0.0376963		Wdfy4	132.303	1.22916	4.47568e-14	3.45944e-12		Rhpn2	163.62	-0.425596	0.000255107	0.0144378								Slc16a4	64.2895	-0.508067	0.00573087	0.0362651		Pbxip1	2915.53	0.856779	1.29119e-15	9.43549e-14
Nhlh2	51.8181	-0.467402	0.00466883	0.0378907		Col20a1	263.993	1.0014	5.23514e-14	4.0141e-12		Myo7a	837.244	-0.38862	0.000257079	0.014451								Cobll1	225.803	-0.370532	0.00579947	0.0366357		Cyp4f14	303.183	0.898545	1.32943e-15	9.67625e-14
Slc16a2	1801.11	-0.33097	0.00479162	0.0386902		Lxn	1234.09	0.602573	5.44677e-14	4.15973e-12		Tbc1d9	2707.59	-0.429681	0.000262654	0.0145849								Baiap2l2	34.2299	-0.487795	0.00583008	0.0368164		Nde1	814.788	0.673424	1.39813e-15	1.01359e-13
Slc37a1	122.596	-0.336903	0.00480071	0.0387473		Ctsb	18569.2	0.766824	6.00597e-14	4.56859e-12		Cfap69	255.922	-0.444201	0.00026399	0.0146032								C030029H02Rik	77.5001	-0.443001	0.00584331	0.036849		Syk	191.939	1.12468	1.61116e-15	1.16341e-13
Nipal2	125.648	-0.359806	0.00498681	0.0399132		Vwa1	727.751	0.960054	6.17528e-14	4.67881e-12		Spint2	357.997	-0.678083	0.000264582	0.0146032								Cfap52	63.0459	-0.524866	0.00584902	0.0368722		Cyr61	178.423	1.43493	1.70724e-15	1.22793e-13
Cish	77.077	-0.469577	0.0050471	0.0403116		Slamf9	32.2948	1.41157	6.46577e-14	4.87962e-12		Plscr2	68.7309	-0.5692	0.000267727	0.0147322								Dnah2	215.378	-0.37863	0.00589559	0.0371018		Sepp1	6497.18	0.740173	1.73627e-15	1.24392e-13
Eno4	79.5418	-0.511534	0.00515434	0.0409803		Ctsz	1677.17	1.21597	6.62047e-14	4.97677e-12		Slc7a10	1129.4	-0.442004	0.00026899	0.014747								Adgrd1	51.718	-0.493501	0.00601244	0.0376685		Ccl12	35.0185	1.45606	1.89429e-15	1.35183e-13
Mfsd7c	40.925	-0.517376	0.00530353	0.0418554		Cmklr1	134.479	1.10094	7.95547e-14	5.95697e-12		Loxl1	186.676	-0.539059	0.000271129	0.0147858								Prox1	922.116	-0.405019	0.00604188	0.037827		Card9	77.1312	1.25402	1.97735e-15	1.40016e-13
Calb2	1061.89	-0.4047	0.00530373	0.0418554		Rab32	129.782	1.29031	8.18418e-14	6.10438e-12		Capsl	75.6976	-0.62063	0.000279745	0.0151651								Tsnaxip1	19.4075	-0.4839	0.0061004	0.038115		Naip5	67.1053	1.42313	2.03601e-15	1.43613e-13
Phldb2	147.052	-0.415808	0.00548248	0.0429831		Serping1	388.173	1.15262	8.65144e-14	6.42788e-12		Klc3	84.4264	-0.558328	0.000293219	0.0157554								Ccdc170	26.8183	-0.504865	0.0061099	0.0381532		Epb4.1l2	2211.67	0.724705	2.1539e-15	1.51345e-13
Alpl	183.827	-0.439122	0.00552124	0.0432163		Ncf2	120.393	1.18943	8.96205e-14	6.63295e-12		Fuca1	1099.47	-0.326985	0.00030071	0.0160166								B230307C23Rik	98.7195	-0.352066	0.0061269	0.0381929		Abcc3	123.966	1.29199	2.57043e-15	1.7992e-13
Fam84b	435.557	-0.487759	0.00563447	0.0437985		Scamp2	792.674	0.643006	9.30328e-14	6.85902e-12		Nipal2	125.648	-0.468366	0.000303233	0.016104								Ror1	77.1601	-0.44219	0.00619334	0.0384773		Scrg1	742.183	0.723761	2.92592e-15	2.04022e-13
Gas2l2	21.0232	-0.488046	0.00568236	0.0440457		Pik3r5	105.533	1.08009	9.65977e-14	7.09456e-12		Catip	108.928	-0.626495	0.000305973	0.0162024								Lhx1os	2.75703	-0.334755	0.00619792	0.0384773		Clic1	425.198	1.21756	3.02118e-15	2.09863e-13
Bmp6	145.936	-0.530557	0.00583856	0.0449115		Tep1	191.173	0.975417	1.06053e-13	7.75927e-12		Bmp6	145.936	-0.662956	0.000311487	0.0164467								Yod1	156.465	-0.327943	0.00661608	0.040411		Acss1	1094.87	0.482971	3.04771e-15	2.10904e-13
Smim18	102.206	-0.349349	0.00585041	0.044968		Acsbg1	4561.52	0.48265	1.16682e-13	8.50451e-12		Ttc25	50.0197	-0.639905	0.000317883	0.016736								Ccdc81	43.9587	-0.49296	0.00666487	0.0406086		Gbp3	184.317	1.3456	3.10642e-15	2.14156e-13
Slco2a1	95.5561	-0.4157	0.00601058	0.0459214		Cd86	77.1822	1.28349	1.19424e-13	8.67136e-12		Efhc1	63.5425	-0.629103	0.000329144	0.0171804								Slc26a10	343.782	-0.486458	0.00679016	0.0411441		Wipf1	382.172	0.755501	3.52163e-15	2.41867e-13
Dhrs11	119.094	-0.426321	0.00614877	0.0466446		Hsd3b7	257.249	0.744392	1.21117e-13	8.7611e-12		2410004P03Rik	112.716	-0.646407	0.000333599	0.0173633								Enpp2	14038.1	-0.543655	0.00683858	0.0413552		Arl11	37.7575	1.47586	3.79231e-15	2.59482e-13
Ppfibp2	271.923	-0.400897	0.00615561	0.0466575		Tubb6	138.023	1.11692	1.33019e-13	9.5859e-12		Pifo	28.8746	-0.638526	0.000335171	0.0173955								1700019L03Rik	17.3532	-0.502835	0.00689875	0.0416501		Sorbs1	5488.56	0.44842	4.10318e-15	2.79705e-13
Cd59a	250.022	-0.436889	0.00623714	0.0471862		Metrn	1488.61	0.912057	1.35264e-13	9.71111e-12		Prps2	799.037	-0.33193	0.000343232	0.0176634								1700026D08Rik	41.9245	-0.504656	0.00693987	0.0418292		Gja1	6634.41	0.692408	4.40194e-15	2.98956e-13
Krt2	213.781	-0.398921	0.00623767	0.0471862		Plcb3	749.595	0.542414	1.39212e-13	9.9573e-12		Pbxip1	2915.53	-0.382833	0.000354506	0.0180329								Rdh5	150.42	-0.561486	0.00698601	0.0420293		Ctsd	22421.9	1.24268	5.02485e-15	3.39996e-13
Lrriq1	54.9013	-0.443131	0.00630174	0.0475022		Cyp4f14	303.183	0.831934	1.45975e-13	1.04022e-11		Il17rc	89.1926	-0.531781	0.000355347	0.0180329								Scara5	26.2171	-0.549803	0.00698686	0.0420293		Plekho1	676.384	0.653128	5.7266e-15	3.86049e-13
Kcnh4	73.8156	-0.43175	0.00640203	0.0481154		Plekho1	676.384	0.616217	1.83571e-13	1.30329e-11		Ggt5	83.0584	-0.55193	0.000360953	0.0182666								1500015O10Rik	284.834	-0.521999	0.00707192	0.0424431		Axl	1887	0.651025	6.04114e-15	4.05756e-13
Rnf152	137.159	-0.433173	0.00640864	0.0481376		Bcl2a1b	47.5579	1.3521	2.07153e-13	1.46528e-11		Cish	77.077	-0.597675	0.000365472	0.0183934								Gpr150	52.8376	-0.44129	0.00709969	0.0425818		Man2b2	1136.66	0.624541	6.39791e-15	4.28144e-13
Dazl	76.9083	-0.366227	0.00654034	0.048916		Apbb1ip	197.585	1.0212	2.10745e-13	1.48521e-11		Cldn1	94.9171	-0.640465	0.000370041	0.0185342								4833427G06Rik	13.9682	-0.509513	0.00736612	0.0438501		Anxa5	1339.53	0.82368	6.46061e-15	4.30762e-13
AK054245	42.0814	-0.45853	0.0066965	0.0498119		Phkg1	643.329	0.529283	2.12437e-13	1.49165e-11		4930529M08Rik	23.85	-0.679744	0.000383789	0.0190012								Rpl9	85.1603	-0.352145	0.00739393	0.0439713		Pcdhgc3	2223.37	0.587043	7.41125e-15	4.9235e-13
Ccbe1	719.56	-0.365671	0.00671435	0.049906		Snx22	262.413	0.732101	2.30489e-13	1.6125e-11		Rbp1	428.003	-0.590632	0.000388	0.0191577								1700013F07Rik	38.3632	-0.482721	0.00759956	0.0449891		Apbb1ip	197.585	1.08162	7.48023e-15	4.95132e-13
Myof	236.818	-0.429478	0.00673486	0.049968		Ms4a6d	75.368	1.2581	2.63715e-13	1.83824e-11		Fzd4	190.061	-0.581759	0.000394115	0.0193524								Abca8a	271.819	-0.336542	0.0077331	0.0455831		Mlxipl	121.865	0.99132	7.73527e-15	5.10165e-13
						Pcdhgc3	2223.37	0.550808	3.011e-13	2.09123e-11		Mc3r	7.85915	-0.501245	0.000411413	0.0198839								Fhad1	204.048	-0.427237	0.00773482	0.0455831		Sipa1	544.091	0.802397	7.78892e-15	5.11855e-13
						Lat2	97.4951	1.23157	3.2143e-13	2.22437e-11		Pcolce	263.812	-0.559112	0.000415023	0.0200054								Ttll9	34.4954	-0.471726	0.00777668	0.045756		Pdlim4	346.042	0.999829	9.21754e-15	6.03567e-13
						Lims2	289.689	0.686799	3.35346e-13	2.31232e-11		Ormdl2	148.873	-0.452681	0.000423441	0.0203575								Phldb2	147.052	-0.398246	0.00778515	0.045791		Cyb5r3	2377.18	0.681307	1.01279e-14	6.60811e-13
						Cav1	469.121	1.03792	3.41959e-13	2.34947e-11		Msrb3	149.697	-0.415919	0.000452242	0.0213489								Xkr4	193.008	-0.325798	0.00779342	0.0458102		Galnt15	57.6046	1.38323	1.12776e-14	7.33206e-13
						Gbp3	184.317	1.23216	3.96068e-13	2.71151e-11		Kat2b	489.75	-0.324999	0.000458626	0.0215944								Stc1	112.133	-0.356263	0.00781148	0.0458767		Ctsz	1677.17	1.253	1.20757e-14	7.82306e-13
						Scara3	1045.71	0.668235	4.21308e-13	2.87404e-11		Col4a5	191.502	-0.560044	0.000473222	0.0220543								Mc3r	7.85915	-0.430606	0.00788715	0.046168		Tfcp2l1	179.921	1.16556	1.26889e-14	8.19132e-13
						Prdx6b	91.4656	1.12471	4.39599e-13	2.98818e-11		Plxnb2	2944.37	-0.350859	0.000474889	0.0220757								Wfdc2	35.7172	-0.460132	0.00795601	0.0465114		P2ry12	940.81	0.857726	1.35415e-14	8.71092e-13
						Wipf1	382.172	0.693898	5.36228e-13	3.63214e-11		Morn2	232.089	-0.348566	0.000481002	0.0222467								Tuft1	93.3077	-0.390944	0.00809403	0.0471118		Fkbp10	336.706	0.871767	1.47173e-14	9.43404e-13
						Ctsl	2653.19	0.804097	6.27158e-13	4.22793e-11		Cyb561	1251.84	-0.39297	0.000486864	0.0224043								Kcnh4	73.8156	-0.419297	0.00813812	0.0473036		Msn	1320.93	1.23904	1.49292e-14	9.53642e-13
						Mki67	268.734	1.09338	6.28599e-13	4.22793e-11		Dhrs11	119.094	-0.544436	0.000488826	0.0224381								Fam47e	11.8145	-0.532448	0.00836722	0.0484814		Rnase4	555.958	0.990179	1.54373e-14	9.82662e-13
						Tcirg1	583.669	0.830795	6.52207e-13	4.37138e-11		5930403L14Rik	1107.32	-0.361907	0.000492175	0.0224789								AK039030	45.9692	-0.423541	0.00837998	0.0485396		Prex1	3682.09	0.372751	1.73536e-14	1.10081e-12
						Pbxip1	2915.53	0.768964	7.1665e-13	4.78657e-11		Eno4	79.5418	-0.632258	0.000508914	0.0231042								Mest	432.221	-0.342506	0.00841782	0.048697		Fxyd1	1353.42	0.95708	2.06904e-14	1.30794e-12
						Naip5	67.1053	1.2686	8.26999e-13	5.46646e-11		Prdm16	442.83	-0.444827	0.000510915	0.0231042								Lrrc18	14.8529	-0.475183	0.00846623	0.0488842		Gsn	2624.64	0.796071	2.21103e-14	1.39287e-12
						Rplp0	3852.9	0.482888	1.02949e-12	6.78154e-11		Postn	60.6926	-0.640806	0.000515386	0.0231198														Sfxn5	5058.98	0.568937	2.23776e-14	1.40486e-12
						Ampd3	756.409	0.769072	1.05316e-12	6.9137e-11		Mycbp	111.65	-0.424637	0.000516046	0.0231198														Prdx6b	91.4656	1.186	2.33028e-14	1.45794e-12
						Steap3	225.111	0.852201	1.11588e-12	7.29268e-11		4932438H23Rik	53.8249	-0.592524	0.000516333	0.0231198														Zfp36	121.04	1.16647	2.36311e-14	1.47344e-12
						Nfe2l2	574.008	0.801927	1.14456e-12	7.41231e-11		Cfap43	118.573	-0.65268	0.000524926	0.0234143														Was	62.1716	1.25963	2.52509e-14	1.56908e-12
						Pdpn	528.504	1.01509	1.14458e-12	7.41231e-11		Ccdc146	41.6402	-0.645874	0.000541332	0.0240039														Cd86	77.1822	1.32062	2.55988e-14	1.5853e-12
						Tmem106a	65.6885	1.28446	1.25957e-12	8.12956e-11		Mr1	181.091	-0.470576	0.000543386	0.0240366														Mlph	75.9959	1.1136	2.79444e-14	1.72472e-12
						Kif20a	73.3171	1.24122	1.33079e-12	8.56039e-11		D630024D03Rik	8.68505	-0.581745	0.000545053	0.0240521														Irgm1	314.267	1.1759	2.81028e-14	1.72866e-12
						Hexa	1854.63	0.729766	1.36676e-12	8.76236e-11		Capn6	59.8633	-0.608864	0.000547698	0.0241106														Itpr2	936.656	0.63707	3.13213e-14	1.92016e-12
						Nde1	814.788	0.598031	1.43522e-12	9.17057e-11		Gng5	216.973	-0.392937	0.000569768	0.0247425														Ctsl	2653.19	0.84793	3.28936e-14	2.00981e-12
						Csf1	974.179	0.736847	1.53671e-12	9.78643e-11		1700012B09Rik	12.1908	-0.614757	0.000570179	0.0247425														Chrdl1	171.114	1.22209	3.44402e-14	2.09729e-12
						Klhl6	102.272	1.27572	1.63965e-12	1.04075e-10		Igf2	1925.64	-0.641636	0.000572813	0.0247979														Ccl9	72.6903	1.28752	3.72186e-14	2.25441e-12
						Pold4	281.018	0.732902	1.68749e-12	1.06758e-10		Fam129b	869.695	-0.404021	0.000575342	0.024835														Hexa	1854.63	0.779354	3.7267e-14	2.25441e-12
						S100a3	20.1796	1.38892	1.87991e-12	1.18539e-10		Slco1c1	1330.49	-0.561672	0.000576388	0.024835														Ctsb	18569.2	0.772801	3.83563e-14	2.31264e-12
						Hvcn1	134.748	1.09884	1.90115e-12	1.19486e-10		Mvp	277.326	-0.464217	0.000618425	0.026449														Acads	258.323	0.718932	4.16131e-14	2.50075e-12
						BC019819	193.269	1.20466	2.06866e-12	1.29589e-10		Stxbp3b	61.7811	-0.516461	0.000619954	0.026449														Dock8	216.876	1.14186	4.2797e-14	2.56347e-12
						Arhgdib	412.675	1.09992	2.08259e-12	1.30036e-10		Lrrc51	104.935	-0.460168	0.000621085	0.026449														Acsbg1	4561.52	0.490712	4.50055e-14	2.68694e-12
						Col16a1	782.878	1.00961	2.21959e-12	1.38141e-10		Tor3a	245.579	-0.514705	0.000639704	0.0270526														Lcp2	159.239	1.30882	4.519e-14	2.68917e-12
						Top2a	266.525	1.06755	2.30173e-12	1.42789e-10		Cfap45	86.4322	-0.577736	0.000644541	0.0271943														Sp110	43.3415	1.4085	4.60675e-14	2.73249e-12
						Gpr34	354.311	1.08366	2.42384e-12	1.49879e-10		C030017K20Rik	57.2463	-0.599908	0.00065011	0.027366														Gldn	144.414	1.31945	4.86957e-14	2.87276e-12
						Adap2	159.439	0.928543	2.46587e-12	1.51988e-10		Bcam	280.362	-0.571881	0.000652096	0.0273865														Dapp1	205.916	0.837054	4.87468e-14	2.87276e-12
						Fam64a	41.3399	1.19496	2.51012e-12	1.53512e-10		Frrs1	41.4224	-0.550557	0.000662721	0.0277054														Gna13	1727.05	0.588	5.2583e-14	3.08887e-12
						Dock8	216.876	1.05742	2.51462e-12	1.53512e-10		Bad	579.084	-0.347403	0.000671611	0.0280129														Lat2	97.4951	1.2733	5.43877e-14	3.18465e-12
						Ctsa	3390.56	0.537489	2.7376e-12	1.66594e-10		Rpl27	79.3375	-0.466642	0.000676924	0.0281062														Mki67	268.734	1.16305	7.16748e-14	4.18347e-12
						Frmd8	697.696	0.811216	2.78077e-12	1.68409e-10		Tmed1	248.778	-0.327618	0.000693994	0.0283004														Phkg1	643.329	0.538927	7.41422e-14	4.31371e-12
						Slc39a1	1093.7	0.739468	2.785e-12	1.68409e-10		Yap1	556.616	-0.328942	0.000701421	0.0285395														Mfsd2a	509.508	0.575216	7.69117e-14	4.46063e-12
						Lpo	57.3253	1.28815	3.35499e-12	2.02238e-10		Ogfod3	127.205	-0.440655	0.000711136	0.0287225														AB347501	47.1252	1.37342	7.74565e-14	4.47802e-12
						Fas	46.1947	1.15044	3.50451e-12	2.10101e-10		Spef2	92.2173	-0.567668	0.000712205	0.0287225														Anxa3	346.178	1.16036	9.40954e-14	5.40726e-12
						Man2b2	1136.66	0.557886	3.50734e-12	2.10101e-10		Dsg2	127.875	-0.449315	0.000720493	0.0288716														Tspan4	367.612	0.940465	9.41217e-14	5.40726e-12
						Capns1	4226.89	0.401577	3.56263e-12	2.12748e-10		Tspan33	793.996	-0.399452	0.000720643	0.0288716														Plod1	892.408	0.773673	1.13769e-13	6.51548e-12
						Aqp4	4926.59	1.08771	3.64794e-12	2.17166e-10		Smad6	31.5939	-0.61523	0.000729979	0.0291816														Blnk	164.241	1.13877	1.26358e-13	7.21388e-12
						Ccdc80	177.878	1.08576	3.69782e-12	2.19454e-10		Cfap70	63.7052	-0.611383	0.000735494	0.029274														Ampd3	756.409	0.799603	1.27485e-13	7.25555e-12
						Msn	1320.93	1.11416	3.97863e-12	2.3539e-10		Gstm2	43.7732	-0.626454	0.000773662	0.0301743														Cmtm7	91.1073	1.17639	1.32541e-13	7.51988e-12
						Lgals1	1175.11	1.26353	3.99272e-12	2.35497e-10		Piezo1	204.757	-0.568302	0.000807499	0.0310573														Vwa1	727.751	0.944189	1.56429e-13	8.84769e-12
						Rassf4	241.287	0.887768	4.55506e-12	2.6784e-10		Mfsd7c	40.925	-0.613809	0.00081332	0.0310848														Snx22	262.413	0.736599	1.58698e-13	8.9483e-12
						BC035044	35.9536	1.22687	4.72848e-12	2.77187e-10		Cfap52	63.0459	-0.618077	0.000821423	0.031329														AK135004	375.209	0.727847	1.63955e-13	9.21629e-12
						Epb4.1l2	2211.67	0.629456	5.71319e-12	3.32876e-10		Zic3	39.5971	-0.604712	0.000830419	0.0315404														Ddr1	2744.4	0.537557	2.10507e-13	1.17607e-11
						Ccl6	59.8528	1.22316	5.88141e-12	3.41639e-10		Trpm3	1812.17	-0.627764	0.000833158	0.0315788														Cd48	35.7487	1.372	2.21405e-13	1.23318e-11
						Tk1	37.4306	1.1332	6.25982e-12	3.62521e-10		Cgn	153.707	-0.512228	0.000841632	0.0316829														S100a16	1925.95	0.88462	2.2425e-13	1.24523e-11
						Sipa1	544.091	0.709954	6.56089e-12	3.78812e-10		Wls	612.127	-0.362587	0.000842842	0.0316829														Bcl2a1b	47.5579	1.34188	2.8999e-13	1.6054e-11
						Emp3	74.9354	1.23502	6.63908e-12	3.82176e-10		Hspg2	266.451	-0.561356	0.000850119	0.0318186														Cbs	1086.94	0.501388	3.08068e-13	1.70033e-11
						Kcnj10	6698.69	0.633234	6.68391e-12	3.83605e-10		Pnp2	17.0925	-0.602692	0.000857317	0.0319639														mKIAA1554_	226.791	1.16017	3.51389e-13	1.93359e-11
						Sepp1	6497.18	0.638313	6.72296e-12	3.84694e-10		Igfbp7	310.969	-0.524298	0.000877489	0.0324511														Lxn	1234.09	0.582296	3.66357e-13	2.0099e-11
						Cd151	757.035	0.775489	7.44596e-12	4.24796e-10		Pafah2	262.089	-0.391315	0.00093753	0.0341871														Abhd15	40.1161	1.23613	3.68838e-13	2.01746e-11
						Ccl9	72.6903	1.15547	8.13886e-12	4.62949e-10		Plce1	526.966	-0.394389	0.00094207	0.0342141														Gpr84	46.349	1.34937	3.96703e-13	2.16339e-11
						Slc15a3	119.792	1.16724	8.28754e-12	4.70011e-10		Ifi27	822.788	-0.41728	0.000942799	0.0342141														Tubb6	138.023	1.07967	4.00919e-13	2.17988e-11
						Slc9a3r1	1478.46	0.6007	8.63416e-12	4.88225e-10		Lrriq1	54.9013	-0.5404	0.000962698	0.0346894														Col20a1	263.993	0.963988	4.22818e-13	2.29212e-11
						Apobr	54.6168	1.15861	8.98967e-12	5.06832e-10		Tns1	983.056	-0.401228	0.000995185	0.0353717														Capns1	4226.89	0.418372	4.27359e-13	2.30989e-11
						Mmp19	68.585	1.24981	9.20896e-12	5.17673e-10		Cd63	753.518	-0.431702	0.00102704	0.0361522														Gpr34	354.311	1.12042	4.47576e-13	2.41203e-11
						Entpd2	482.596	0.763188	9.4515e-12	5.29754e-10		Ttll9	34.4954	-0.583602	0.00104607	0.0364014														Kif20a	73.3171	1.2746	4.64458e-13	2.49564e-11
						Fabp5	2101.61	0.737863	9.62098e-12	5.37681e-10		H2-Ab1	53.8041	-0.411314	0.00108599	0.0374339														Rplp0	3852.9	0.489727	4.87952e-13	2.61419e-11
						Cdc20	62.8807	1.22845	1.07566e-11	5.99398e-10		Col27a1	257.583	-0.372335	0.0010908	0.037529														Sh3bp2	180.746	0.965447	5.21178e-13	2.78403e-11
						Entpd1	365.828	0.696868	1.16698e-11	6.46525e-10		Slc4a11	31.8046	-0.547736	0.00110924	0.0380916														Fas	46.1947	1.19506	5.39151e-13	2.87165e-11
						Scrg1	742.183	0.622691	1.19498e-11	6.60133e-10		Mavs	281.862	-0.362209	0.00112227	0.0384022														Tmem106a	65.6885	1.30834	5.43011e-13	2.8838e-11
						Rnase4	555.958	0.873036	1.23346e-11	6.79433e-10		Acad8	729.113	-0.371893	0.00112281	0.0384022														Arhgdib	412.675	1.12879	5.63008e-13	2.98133e-11
						Rab29	164.75	0.884979	1.35376e-11	7.43561e-10		Ccdc170	26.8183	-0.581849	0.00115322	0.0391602														Pdpn	528.504	1.0265	6.39118e-13	3.37458e-11
						Sbno2	943.645	0.851217	1.50384e-11	8.2363e-10		Neu2	15.7307	-0.593401	0.0011704	0.0396005														H2-Ab1	53.8041	1.37036	6.8622e-13	3.61284e-11
						Cmtm7	91.1073	1.06547	1.82083e-11	9.94399e-10		Tcaf2	29.0247	-0.569423	0.00118746	0.0400993														Ms4a6b	56.5717	1.31911	7.58675e-13	3.98283e-11
						Pdlim2	335.811	0.701289	1.93492e-11	1.0537e-09		Kcnh2	748.085	-0.345151	0.00119714	0.0402583														Cttnbp2nl	851.374	0.603874	7.7673e-13	4.06592e-11
						Mgst1	244.213	0.728818	2.12194e-11	1.14902e-09		Hspb6	372.496	-0.435967	0.00126949	0.0419006														Slc39a1	1093.7	0.756729	8.50723e-13	4.44053e-11
						Hk2	258.729	0.956119	2.17846e-11	1.17631e-09		Dmpk	456.063	-0.371194	0.00127062	0.0419006														Lsp1	131.848	1.13347	8.73402e-13	4.54592e-11
						Hacd4	73.518	1.10578	2.38852e-11	1.28611e-09		Akip1	74.5509	-0.478899	0.00129312	0.0425656														Prex2	1841.73	0.663919	9.37306e-13	4.86467e-11
						Ptx3	42.4	1.17399	2.74749e-11	1.47526e-09		Mgst1	244.213	-0.361362	0.00137884	0.0445054														Cd38	261.65	0.737402	9.77038e-13	5.05652e-11
						Ifi204	50.7858	1.02756	2.94299e-11	1.57581e-09		Htr2c	1161.49	-0.578328	0.00138716	0.0446949														Serping1	388.173	1.09864	1.07672e-12	5.541e-11
						Mpst	565.16	0.516922	3.19278e-11	1.7048e-09		Abcc4	278.638	-0.365162	0.00140227	0.0451024														Sparc	11559.6	0.648883	1.0861e-12	5.55817e-11
						Tagln2	304.827	1.08442	3.27418e-11	1.74341e-09		Phldb2	147.052	-0.479134	0.00143104	0.0455952														Sbno2	943.645	0.898013	1.09523e-12	5.58904e-11
						A2m	1193.35	1.23582	3.28754e-11	1.74568e-09		2010320M18Rik	110.052	-0.428915	0.00145376	0.0459495														Top2a	266.525	1.09184	1.10844e-12	5.6407e-11
						Dapp1	205.916	0.738526	3.33419e-11	1.76555e-09		Cfap44	299.247	-0.463391	0.00149211	0.046787														Entpd2	482.596	0.795953	1.15648e-12	5.86883e-11
						P2rx7	388.955	0.644187	3.39205e-11	1.79125e-09		Dlec1	111.32	-0.495325	0.00151627	0.0470488														Steap3	225.111	0.850376	1.22387e-12	6.1936e-11
						Acads	258.323	0.632612	3.4747e-11	1.82985e-09		Ctsh	513.381	-0.385232	0.0015301	0.0472985														Lyl1	73.117	1.17503	1.28189e-12	6.46929e-11
						Kctd5	657.651	0.497772	3.69629e-11	1.9359e-09		Klhdc8b	546.173	-0.38441	0.0015497	0.0478235														Ptx3	42.4	1.27915	1.32844e-12	6.68573e-11
						Arap1	611.552	0.660628	4.06779e-11	2.12467e-09		Ulk4	195.181	-0.326082	0.00158239	0.0485045														Icam1	98.7911	1.26735	1.42783e-12	7.14656e-11
						Fam167a	135.366	1.07268	4.09667e-11	2.13394e-09		Ocln	256.641	-0.358679	0.00160873	0.0490479														Ccl6	59.8528	1.26062	1.46107e-12	7.29299e-11
						Hpgds	228.893	1.05198	4.3902e-11	2.28064e-09		Mapkapk3	88.6597	-0.432121	0.00163614	0.0490479														Hpgds	228.893	1.13071	1.54514e-12	7.67072e-11
						Cdkn2c	100.994	1.18421	4.40756e-11	2.28347e-09																				S100a10	492.346	1.02313	1.57801e-12	7.81265e-11
						Abca9	263.547	0.713702	4.48224e-11	2.31591e-09																				Pold4	281.018	0.733323	1.59846e-12	7.89252e-11
						Chst2	5171.65	0.482297	4.68308e-11	2.41317e-09																				Cd151	757.035	0.798985	1.68951e-12	8.30395e-11
						Ccl12	35.0185	1.05753	4.85521e-11	2.49516e-09																				C5ar1	40.4051	1.31919	1.69088e-12	8.30395e-11
						Pbk	82.1546	0.999072	5.26229e-11	2.69714e-09																				Gnai2	5157.39	0.548084	1.76051e-12	8.62273e-11
						Tlr1	39.064	1.21159	5.37997e-11	2.7501e-09																				Gltp	981.926	0.773434	1.85524e-12	9.03951e-11
						Rab31	2213.77	0.69862	5.49275e-11	2.80028e-09																				Slc9a3r1	1478.46	0.619642	1.8555e-12	9.03951e-11
						Dcxr	203.88	0.661542	5.60919e-11	2.85206e-09																				Il21r	62.2995	1.18818	1.9897e-12	9.66753e-11
						Lyl1	73.117	1.08213	5.68095e-11	2.86979e-09																				Fam64a	41.3399	1.20214	2.05802e-12	9.97292e-11
						Atp1a2	35322.9	0.46314	5.68708e-11	2.86979e-09																				BC019819	193.269	1.20415	2.09219e-12	1.01117e-10
						As3mt	281.403	0.670825	5.68897e-11	2.86979e-09																				Irak4	67.6372	1.17331	2.46198e-12	1.18675e-10
						Gna13	1727.05	0.51234	5.71912e-11	2.87742e-09																				Tk1	37.4306	1.16605	2.70092e-12	1.2985e-10
						Gnai2	5157.39	0.508904	5.87203e-11	2.93893e-09																				Lcat	932.252	0.590027	2.77788e-12	1.332e-10
						Phgdh	944.399	0.486185	6.14732e-11	3.0687e-09																				As3mt	281.403	0.714083	2.85762e-12	1.3639e-10
						Atf5	457.166	0.584196	6.17996e-11	3.07698e-09																				Themis2	46.224	1.28425	2.85934e-12	1.3639e-10
						Npl	131.518	1.13713	6.51094e-11	3.22502e-09																				Gjb6	1365.68	0.619964	3.08046e-12	1.46555e-10
						Slc11a1	103.708	1.09884	6.85083e-11	3.38463e-09																				Cyp2j9	819.218	0.458595	3.38477e-12	1.60614e-10
						Mlph	75.9959	0.95292	7.36475e-11	3.62917e-09																				Ntpcr	478.007	0.54404	3.67281e-12	1.73831e-10
						Vwa5a	533.106	0.740921	7.42554e-11	3.64975e-09																				Plcb3	749.595	0.509192	3.91081e-12	1.84617e-10
						Tlr13	115.55	1.17066	7.91143e-11	3.86873e-09																				Lgals1	1175.11	1.26126	4.29621e-12	2.01767e-10
						Foxm1	116.927	1.1705	8.00776e-11	3.90587e-09																				Hk2	258.729	0.989093	4.38476e-12	2.05398e-10
						Cttnbp2nl	851.374	0.547663	8.57338e-11	4.17114e-09																				Gsap	364.359	0.786682	4.80269e-12	2.244e-10
						Anxa3	346.178	1.00756	8.63352e-11	4.18977e-09																				Tlr1	39.064	1.28117	6.08908e-12	2.83436e-10
						Clu	30077.7	0.337647	9.06511e-11	4.38811e-09																				Npl	131.518	1.20217	6.09724e-12	2.83436e-10
						Aldh3b1	187.641	0.702322	9.22699e-11	4.45522e-09																				Lpcat2	328.169	0.755491	6.35461e-12	2.94651e-10
						Ddah2	357.697	0.736555	9.74362e-11	4.69285e-09																				Phgdh	944.399	0.510239	6.44761e-12	2.97506e-10
						Exoc3l4	105.271	1.18396	9.80852e-11	4.71227e-09																				Plcg2	262.824	0.968291	6.44875e-12	2.97506e-10
						Cyb5r3	2377.18	0.566933	1.23475e-10	5.91724e-09																				Emp3	74.9354	1.23401	6.74139e-12	3.10223e-10
						Lamp1	8896.54	0.434127	1.31114e-10	6.25204e-09																				Itga6	552.094	0.807365	6.84078e-12	3.14006e-10
						Themis2	46.224	1.16485	1.47009e-10	6.9753e-09																				Dennd1c	59.6147	1.06459	7.23135e-12	3.31102e-10
						Ckap2	78.9891	0.993593	1.48945e-10	7.0497e-09																				BC026585	227.481	0.749323	7.72104e-12	3.52639e-10
						5430435G22Rik	83.1873	1.13998	1.51699e-10	7.16234e-09																				Tep1	191.173	0.897817	7.77249e-12	3.54104e-10
						Pmp22	479.635	0.823943	1.56883e-10	7.38891e-09																				Metrn	1488.61	0.842101	8.17211e-12	3.71384e-10
						Slc13a3	534.659	0.924419	1.68408e-10	7.91229e-09																				Klhl6	102.272	1.22644	9.01054e-12	4.08471e-10
						Htra3	154.171	1.02786	1.78465e-10	8.36428e-09																				Spint1	118.416	1.0098	9.76656e-12	4.41647e-10
						Szrd1	1132.82	0.466466	1.96238e-10	9.13719e-09																				Heatr5a	379.721	0.695375	1.07444e-11	4.83473e-10
						Ms4a6b	56.5717	1.14553	1.96386e-10	9.13719e-09																				Hepacam	2948.14	0.560302	1.11601e-11	5.00943e-10
						Irgm1	314.267	0.978764	2.06539e-10	9.58633e-09																				Srgn	159.419	1.04985	1.14157e-11	5.11161e-10
						Irak4	67.6372	1.05951	2.09609e-10	9.69314e-09																				Hk3	82.252	1.21676	1.27794e-11	5.70822e-10
						Birc5	64.4919	1.1363	2.09852e-10	9.69314e-09																				Trim14	39.5778	1.26817	1.3828e-11	6.16156e-10
						Cd44	390.604	1.09427	2.12297e-10	9.7825e-09																				Htra3	154.171	1.08932	1.47466e-11	6.55487e-10
						Cd48	35.7487	1.13547	2.21459e-10	1.01558e-08																				Ccdc80	177.878	1.05233	1.58026e-11	7.00725e-10
						Prc1	139.569	0.997173	2.68937e-10	1.23037e-08																				Wdr62	77.6174	1.07231	1.79195e-11	7.90751e-10
						Pld2	844.503	0.389806	2.71386e-10	1.23862e-08																				Inppl1	1045.56	0.496435	1.96304e-11	8.62085e-10
						Inppl1	1045.56	0.467159	2.83711e-10	1.2918e-08																				Cdc20	62.8807	1.20708	2.05913e-11	9.02116e-10
						Nagpa	290.442	0.526393	2.90327e-10	1.31878e-08																				Rcsd1	132.151	0.916287	2.10779e-11	9.21226e-10
						Heatr5a	379.721	0.644813	3.09842e-10	1.40411e-08																				Slc2a5	144.801	0.753875	2.18496e-11	9.52673e-10
						Fam20a	406.014	0.52683	3.34045e-10	1.51022e-08																				Hrsp12	820.486	0.682508	2.21559e-11	9.6373e-10
						Blnk	164.241	0.962198	3.36243e-10	1.51657e-08																				Wfdc17	20.5775	1.23403	2.36138e-11	1.02081e-09
						Il21r	62.2995	1.05397	3.47807e-10	1.56505e-08																				Tlr13	115.55	1.20464	2.67708e-11	1.15348e-09
						C3	147.82	1.0862	3.52879e-10	1.58415e-08																				Cadm4	4522.27	0.502525	2.69729e-11	1.15946e-09
						Gpr84	46.349	1.11958	4.02767e-10	1.80389e-08																				Tagln2	304.827	1.08843	2.76952e-11	1.18771e-09
						Abhd15	40.1161	1.0533	4.08137e-10	1.82368e-08																				Birc5	64.4919	1.19896	3.10081e-11	1.32048e-09
						Wfdc17	20.5775	1.10098	4.23297e-10	1.88264e-08																				Arhgap19	115.926	0.955698	3.15943e-11	1.34232e-09
						Ncf4	41.6457	1.14764	4.32134e-10	1.91749e-08																				Ifi27l2a	70.4863	1.0415	3.23818e-11	1.37258e-09
						Plek	572.131	1.08001	4.83284e-10	2.13951e-08																				Tap1	138.458	1.01044	3.30044e-11	1.39573e-09
						Zfp703	546.719	0.69749	4.85359e-10	2.14374e-08																				Lpcat3	624.196	0.458612	3.34608e-11	1.41177e-09
						Rlbp1	565.767	0.443453	5.54296e-10	2.437e-08																				Tln1	1865.28	0.610638	3.52124e-11	1.48225e-09
						Gjb6	1365.68	0.551345	5.73253e-10	2.51457e-08																				Mmp19	68.585	1.20671	3.65042e-11	1.53309e-09
						Apobec1	116.2	1.09271	5.88398e-10	2.57511e-08																				Nagpa	290.442	0.551226	3.7402e-11	1.5672e-09
						Sardh	529.25	0.754321	5.98452e-10	2.61315e-08																				Col16a1	782.878	0.94934	3.93111e-11	1.64342e-09
						Mlxipl	121.865	0.791369	6.26944e-10	2.72712e-08																				Fyb	612.833	0.663461	3.95599e-11	1.65004e-09
						Wdr62	77.6174	0.98198	6.82934e-10	2.9618e-08																				Pld2	844.503	0.406743	4.21017e-11	1.74808e-09
						Gpx1	1410.67	0.662465	6.88793e-10	2.98047e-08																				Lrrk1	127.567	1.00415	4.3125e-11	1.78651e-09
						Mfsd2a	509.508	0.476164	7.14095e-10	3.08299e-08																				Cav1	469.121	0.938964	4.35769e-11	1.80115e-09
						Ncan	7190.48	0.446826	9.63892e-10	4.13352e-08																				Aqp4	4926.59	1.02898	4.56317e-11	1.88182e-09
						Myo6	3805.48	0.430648	9.73451e-10	4.1652e-08																				Plcb2	134.138	0.946577	4.5882e-11	1.88788e-09
						Sgpl1	1239.9	0.651023	9.81167e-10	4.18886e-08																				Parp14	121.734	1.13892	5.27413e-11	2.16038e-09
						Bmp2k	413.896	0.703736	1.01365e-09	4.31791e-08																				Ncf4	41.6457	1.21274	5.99506e-11	2.44473e-09
						C5ar1	40.4051	1.09172	1.05631e-09	4.48966e-08																				Tns3	2589.47	0.509369	6.19896e-11	2.52224e-09
						Wasf2	456.133	0.542303	1.06517e-09	4.51732e-08																				Akna	199.877	0.748234	6.26946e-11	2.54526e-09
						Lcp2	159.239	1.04148	1.11007e-09	4.69733e-08																				Apobr	54.6168	1.10673	6.35478e-11	2.57418e-09
						Sfxn5	5058.98	0.454009	1.12408e-09	4.74615e-08																				Gpx1	1410.67	0.701019	6.6385e-11	2.68316e-09
						Hk3	82.252	1.08247	1.13679e-09	4.78927e-08																				Plek	572.131	1.13397	7.27211e-11	2.9263e-09
						Traf3ip3	33.3242	1.09361	1.22319e-09	5.14195e-08																				Il4ra	286.308	1.18039	8.07657e-11	3.23451e-09
						Psph	406.176	0.510574	1.24434e-09	5.21942e-08																				Gsdmd	85.3946	1.0591	8.42989e-11	3.35524e-09
						Icam1	98.7911	1.07305	1.24988e-09	5.23121e-08																				Tspan15	531.731	0.612318	9.49441e-11	3.76255e-09
						Oat	2096.11	0.401294	1.28101e-09	5.34982e-08																				5430435G22Rik	83.1873	1.15295	9.65105e-11	3.81634e-09
						Ptgfrn	483.116	0.814697	1.3584e-09	5.66069e-08																				A2m	1193.35	1.19818	9.95917e-11	3.92968e-09
						Phyhd1	509.059	0.498542	1.42489e-09	5.92488e-08																				Rassf4	241.287	0.828546	1.05995e-10	4.17333e-09
						Slc22a4	268.639	0.589034	1.47153e-09	6.10556e-08																				Mmd2	6153.63	0.391084	1.08528e-10	4.26388e-09
						Igsf10	160.644	0.815951	1.53594e-09	6.33172e-08																				Icosl	487.335	0.542136	1.11022e-10	4.3525e-09
						Dbndd2	3238.53	0.601353	1.63436e-09	6.72297e-08																				Ptpn18	61.4105	1.10044	1.24335e-10	4.86399e-09
						Il13ra1	198.056	0.8966	1.74678e-09	7.17005e-08																				Dnase2a	145.015	1.0446	1.30682e-10	5.10134e-09
						Skap2	348.999	0.59802	1.82485e-09	7.45264e-08																				Rhoc	383.019	0.865923	1.33798e-10	5.21184e-09
						Lrrk1	127.567	0.914864	1.8273e-09	7.45264e-08																				Gng5	216.973	0.701958	1.38168e-10	5.35923e-09
						Timp4	920.905	0.578024	1.85491e-09	7.53663e-08																				Elk3	236.385	0.789019	1.38872e-10	5.37513e-09
						Pax6	240.564	0.51939	1.85575e-09	7.53663e-08																				Uba7	171.175	0.889691	1.40544e-10	5.42833e-09
						Spint1	118.416	0.890383	1.86415e-09	7.55475e-08																				Slamf9	32.2948	1.1698	1.51617e-10	5.83135e-09
						Ifi27l2a	70.4863	0.882708	1.92839e-09	7.79858e-08																				Gadd45g	384.876	0.749231	1.52449e-10	5.85102e-09
						Tgfb1	161.972	0.990376	1.95149e-09	7.8754e-08																				Slc7a7	74.7972	1.12045	1.54916e-10	5.93327e-09
						Plxdc2	932.226	0.601308	2.03039e-09	8.17657e-08																				Susd3	52.9285	1.04478	1.55954e-10	5.96052e-09
						Tpx2	163.939	1.0655	2.24247e-09	8.99287e-08																				Rab29	164.75	0.836769	1.60337e-10	6.11524e-09
						Itga6	552.094	0.703686	2.27655e-09	9.11049e-08																				Skap2	348.999	0.633292	1.82372e-10	6.92674e-09
						Rps9	3594.74	0.337387	2.33658e-09	9.33121e-08																				Zc3hav1	95.3951	0.891949	1.89854e-10	7.19594e-09
						Trp53inp2	4885.1	0.342925	2.3459e-09	9.34899e-08																				Cd44	390.604	1.0976	1.92282e-10	7.27288e-09
						Psat1	3040.24	0.54224	2.50666e-09	9.9689e-08																				Foxm1	116.927	1.14194	1.99956e-10	7.54751e-09
						Fxyd1	1353.42	0.745463	2.51663e-09	9.98782e-08																				Il13ra1	198.056	0.946201	2.14247e-10	8.05365e-09
						Cybb	48.5509	1.06118	2.65419e-09	1.0512e-07																				Epsti1	34.4153	1.1729	2.20111e-10	8.24016e-09
						H2-Ab1	53.8041	1.10014	2.68488e-09	1.06116e-07																				Trim30a	120.853	1.18428	2.20986e-10	8.25602e-09
						Wdr81	1136.13	0.349454	2.76992e-09	1.09028e-07																				Kcnj10	6698.69	0.585011	2.27181e-10	8.47015e-09
						Ckap2l	92.3408	0.965331	2.84499e-09	1.11753e-07																				Serpine1	39.3987	1.02798	2.27821e-10	8.47669e-09
						Eml3	358.876	0.503475	2.87329e-09	1.12634e-07																				Pea15a	19576	0.450322	2.32542e-10	8.61733e-09
						P2ry12	940.81	0.660738	3.05064e-09	1.19099e-07																				Stom	501.868	0.747812	2.32544e-10	8.61733e-09
						AK135004	375.209	0.586849	3.09804e-09	1.20704e-07																				Atp1a2	35322.9	0.447345	2.47782e-10	9.16343e-09
						Trf	9631.15	0.932529	3.2864e-09	1.27783e-07																				Farp1	1903.05	0.483847	2.5073e-10	9.25371e-09
						Cdk1	74.8865	0.929125	3.30373e-09	1.28197e-07																				Rsu1	658.293	0.51904	2.5281e-10	9.30071e-09
						Lsp1	131.848	0.932289	3.47284e-09	1.34216e-07																				Dtx3l	174.758	0.809973	2.53022e-10	9.30071e-09
						Col4a6	100.43	1.07668	3.77146e-09	1.45463e-07																				Gm6548	576.964	0.464066	2.58352e-10	9.45857e-09
						Fgfrl1	718.69	0.747185	3.78371e-09	1.45642e-07																				Oas1a	35.7623	1.18425	2.61042e-10	9.53796e-09
						Zc3hav1	95.3951	0.825709	3.8101e-09	1.46364e-07																				Spp1	1155.11	0.730772	2.75554e-10	1.00481e-08
						Hpgd	188.719	0.854071	4.14821e-09	1.59034e-07																				H2-Q4	90.698	1.05785	2.86266e-10	1.04179e-08
						Plcg2	262.824	0.82784	4.17677e-09	1.59809e-07																				Ptgs1	379.497	0.621816	2.91912e-10	1.06023e-08
						Ntpcr	478.007	0.460934	4.45958e-09	1.7029e-07																				Chst2	5171.65	0.461877	2.93749e-10	1.06478e-08
						Il4ra	286.308	1.05285	4.56233e-09	1.73867e-07																				Cryba4	29.6476	1.18176	3.04311e-10	1.10088e-08
						Nusap1	58.2761	1.00534	4.57964e-09	1.74181e-07																				Cyp4v3	232.755	0.66346	3.16126e-10	1.14137e-08
						Ctla2b	35.9268	1.07118	4.74761e-09	1.80212e-07																				Rin3	73.5609	0.973306	3.73395e-10	1.34547e-08
						Taldo1	2119.85	0.335253	4.85462e-09	1.83182e-07																				Rgs20	567.136	0.690118	3.93997e-10	1.41692e-08
						Plod3	989.858	0.384143	4.86987e-09	1.83182e-07																				Ckap2	78.9891	0.956239	4.00223e-10	1.43648e-08
						Gcnt1	95.3716	0.979005	4.8718e-09	1.83182e-07																				Vwa5a	533.106	0.710714	4.18981e-10	1.50086e-08
						Sh3bp2	180.746	0.783089	4.87364e-09	1.83182e-07																				Cfh	658.048	0.863413	4.25767e-10	1.52218e-08
						Hmmr	51.9811	0.999177	5.08228e-09	1.9065e-07																				Parp9	147.129	0.967423	4.51561e-10	1.61124e-08
						Cd63	753.518	0.77181	5.35176e-09	1.99976e-07																				Tspo	174.312	1.03287	4.66926e-10	1.66282e-08
						Car5b	155.499	0.83721	5.5427e-09	2.06708e-07																				Igsf10	160.644	0.840896	4.72495e-10	1.67938e-08
						Mfap3l	1652.12	0.52452	5.60498e-09	2.08625e-07																				Kctd5	657.651	0.468774	4.74053e-10	1.68165e-08
						Rgma	1231.57	0.5025	5.79249e-09	2.15187e-07																				Gm2a	2032.3	0.377726	4.75854e-10	1.68476e-08
						Prcp	189.497	0.651892	5.87851e-09	2.1796e-07																				Ccnb2	57.7181	1.14184	4.78717e-10	1.69162e-08
						abParts	344.282	0.865227	6.15303e-09	2.27259e-07																				Apobec1	116.2	1.09741	4.95762e-10	1.74847e-08
						Scg3	8206.14	0.440603	7.33976e-09	2.70178e-07																				Ctsc	516.878	0.956983	4.97569e-10	1.75146e-08
						Atf3	44.4696	1.05299	7.34324e-09	2.70178e-07																				Rhoj	138.277	0.888485	5.04707e-10	1.77317e-08
						Rhoc	383.019	0.779158	7.46439e-09	2.73585e-07																				Lilrb4	72.9043	0.785271	5.7744e-10	2.02093e-08
						Ticam2	35.5895	1.04863	7.69201e-09	2.8139e-07																				Ecscr	115.02	0.999389	5.84922e-10	2.0432e-08
						Bhlhe41	813.772	0.5032	7.8996e-09	2.88433e-07																				Btk	54.522	1.13687	6.07676e-10	2.11863e-08
						Mtmr11	289.465	0.757562	8.14757e-09	2.96922e-07																				Tgfb1	161.972	1.02116	6.25567e-10	2.17412e-08
						Fam107a	13809.6	0.381518	8.4673e-09	3.07405e-07																				Sgpl1	1239.9	0.65852	6.25971e-10	2.17412e-08
						Itih3	883.893	0.532632	8.77026e-09	3.17802e-07																				Lpo	57.3253	1.11977	6.44648e-10	2.23051e-08
						Athl1	258.507	0.722047	8.98576e-09	3.24996e-07																				Oasl2	134.061	1.1461	6.59138e-10	2.27633e-08
						Cdc42ep4	1173.24	0.519236	9.16229e-09	3.30757e-07																				P2rx7	388.955	0.600267	6.69548e-10	2.30792e-08
						Dennd1c	59.6147	0.890013	9.19141e-09	3.31184e-07																				Hpgd	188.719	0.893952	7.57939e-10	2.60278e-08
						Cxcl5	29.3137	1.05902	1.01453e-08	3.64187e-07																				Samsn1	46.6016	1.12591	8.01268e-10	2.74127e-08
						Endou	44.3449	1.05249	1.03159e-08	3.69619e-07																				Scg3	8206.14	0.467476	8.44989e-10	2.88006e-08
						Arhgap19	115.926	0.824118	1.03421e-08	3.69864e-07																				Cybb	48.5509	1.10345	8.49163e-10	2.88889e-08
						Ube2c	59.6135	0.767036	1.04569e-08	3.73275e-07																				Slc22a4	268.639	0.596246	8.9924e-10	3.04791e-08
						Jak3	250.342	0.81116	1.09908e-08	3.90876e-07																				Gmfg	18.7744	1.17869	9.21745e-10	3.1184e-08
						Nuf2	132.286	0.976004	1.10232e-08	3.91304e-07																				Lamp1	8896.54	0.413197	9.59163e-10	3.23899e-08
						Fabp7	1311.98	1.03743	1.1327e-08	4.01343e-07																				Sardh	529.25	0.744394	9.93735e-10	3.34955e-08
						Prex2	1841.73	0.530624	1.18434e-08	4.18867e-07																				Ssc5d	130.829	0.917695	1.0355e-09	3.4839e-08
						Lcat	932.252	0.482195	1.19328e-08	4.21252e-07																				Gpld1	1358.57	0.477876	1.08941e-09	3.65852e-08
						Btk	54.522	1.03505	1.24659e-08	4.39262e-07																				Pyroxd2	99.7042	0.981196	1.12296e-09	3.76428e-08
						Ppp1r3c	1546.9	0.583905	1.27867e-08	4.49739e-07																				Prc1	139.569	0.939888	1.22436e-09	4.09666e-08
						Cebpd	331.431	0.910536	1.34886e-08	4.7356e-07																				BC035044	35.9536	1.06423	1.23185e-09	4.11421e-08
						Igfbp5	1997.47	0.763688	1.44979e-08	5.06211e-07																				Sh3tc1	54.4475	1.00907	1.23434e-09	4.11498e-08
						Samsn1	46.6016	1.02917	1.46846e-08	5.11799e-07																				Cd63	753.518	0.803058	1.26482e-09	4.20892e-08
						Tmem198b	399.338	0.576591	1.48402e-08	5.16284e-07																				Tmem179b	130.021	0.660652	1.33814e-09	4.43674e-08
						Emp1	116.537	0.992991	1.59151e-08	5.52677e-07																				Man2b1	1633.56	0.503497	1.38497e-09	4.58371e-08
						Gngt2	100.96	0.962162	1.75922e-08	6.0871e-07																				Cdk1	74.8865	0.961957	1.45045e-09	4.79172e-08
						Rrm2	154.926	0.859473	1.79248e-08	6.19099e-07																				Ticam2	35.5895	1.10412	1.49766e-09	4.93876e-08
						Rgs20	567.136	0.621199	1.82676e-08	6.29807e-07																				Hspb8	634.693	0.749793	1.51492e-09	4.98669e-08
						Rapgef3	1009.95	0.504516	1.87251e-08	6.44419e-07																				Tmem198b	399.338	0.614467	1.52491e-09	5.01053e-08
						Dnase2a	145.015	0.910662	1.88192e-08	6.46499e-07																				S100a3	20.1796	1.11258	1.58682e-09	5.20461e-08
						Sprr1a	16.6484	1.12538	1.89718e-08	6.50574e-07																				Lrrc8a	1310.22	0.363268	1.62698e-09	5.32676e-08
						Zcchc24	2385.08	0.414376	1.92107e-08	6.57589e-07																				Plod3	989.858	0.395601	1.63421e-09	5.34086e-08
						Gsap	364.359	0.640118	1.98313e-08	6.77622e-07																				Hmmr	51.9811	1.04369	1.66554e-09	5.43352e-08
						Oaf	329.592	0.507883	2.04059e-08	6.94781e-07																				Slc13a3	534.659	0.870265	1.76119e-09	5.73531e-08
						Cdca8	72.2895	1.01278	2.10075e-08	7.13995e-07																				Exoc3l4	105.271	1.08515	1.84315e-09	5.98111e-08
						Rinl	79.3639	0.790081	2.11674e-08	7.18156e-07																				Asrgl1	4740.7	0.486975	1.84321e-09	5.98111e-08
						Ppard	527.562	0.377019	2.17144e-08	7.35413e-07																				Oaf	329.592	0.543062	1.88558e-09	6.10774e-08
						Als2cl	312.571	0.595522	2.24184e-08	7.57917e-07																				Lmcd1	174.169	0.762149	1.91813e-09	6.20217e-08
						Bmf	122.579	0.692297	2.24756e-08	7.58511e-07																				Pbk	82.1546	0.859895	1.92555e-09	6.21516e-08
						Fyb	612.833	0.562171	2.28154e-08	7.68627e-07																				Psmb9	40.5948	1.04232	1.93552e-09	6.23634e-08
						Dbx2	567.243	0.533078	2.35225e-08	7.91057e-07																				Ccdc88b	182.948	0.808537	1.99748e-09	6.42463e-08
						Cdca3	84.4688	0.932178	2.42079e-08	8.12682e-07																				Ube2c	59.6135	0.836208	2.00159e-09	6.42654e-08
						Rcsd1	132.151	0.763236	2.48314e-08	8.32157e-07																				Rab31	2213.77	0.63858	2.04917e-09	6.55971e-08
						Elovl5	1779.18	0.449726	2.54438e-08	8.49707e-07																				Fmnl3	350.963	0.699847	2.05025e-09	6.55971e-08
						Sox8	870.334	0.362114	2.55538e-08	8.51898e-07																				Ilk	1960.33	0.381844	2.21508e-09	7.06234e-08
						C530044C16Rik	26.7287	1.02586	2.72602e-08	9.07206e-07																				Arap1	611.552	0.597736	2.37113e-09	7.54671e-08
						Rasa4	176.53	0.672085	2.73096e-08	9.07276e-07																				Kif4	65.3572	1.0868	2.39299e-09	7.60306e-08
						Apod	4967.93	0.94718	2.76866e-08	9.18209e-07																				Ralb	474.395	0.513883	2.4558e-09	7.78907e-08
						Ccnb2	57.7181	0.994616	3.23481e-08	1.06911e-06																				Nusap1	58.2761	1.02875	2.48218e-09	7.8591e-08
						BC026585	227.481	0.607241	3.29137e-08	1.08593e-06																				S100b	2929.22	0.443015	2.52314e-09	7.96119e-08
						Slc7a7	74.7972	0.958344	3.32901e-08	1.09646e-06																				Nrros	231.357	0.752681	2.78541e-09	8.75847e-08
						Cyr61	178.423	0.959099	3.42148e-08	1.12498e-06																				Hist1h1c	250.202	0.787759	2.8069e-09	8.81088e-08
						Hsd17b4	1553.12	0.356252	3.44245e-08	1.12994e-06																				Rps9	3594.74	0.335587	2.82258e-09	8.82976e-08
						Lrrc3	256.309	0.675769	3.55348e-08	1.16439e-06																				Npc2	1843.8	0.588975	2.86012e-09	8.93189e-08
						Lpcat2	328.169	0.607335	3.59361e-08	1.17352e-06																				Tpx2	163.939	1.05458	3.04539e-09	9.49423e-08
						Slc2a5	144.801	0.623504	3.60628e-08	1.17566e-06																				Col4a6	100.43	1.08262	3.14664e-09	9.79317e-08
						Rab13	158.023	0.724981	3.61803e-08	1.17749e-06																				Brca1	59.1305	1.03819	3.27343e-09	1.01705e-07
						Cmtm3	283.58	0.727466	3.78122e-08	1.22851e-06																				Arhgef40	771.256	0.512388	3.38733e-09	1.04887e-07
						Hrsp12	820.486	0.561033	3.92511e-08	1.27067e-06																				Fabp5	2101.61	0.63947	3.54057e-09	1.09446e-07
						Tcf19	120.822	0.9893	3.93086e-08	1.27067e-06																				Szrd1	1132.82	0.432168	3.76211e-09	1.15902e-07
						Gm20743	44.0128	0.90722	3.98097e-08	1.2847e-06																				Oat	2096.11	0.389207	3.92605e-09	1.20749e-07
						Rnf180	431.642	0.485849	4.01273e-08	1.29277e-06																				Trim30d	57.9368	1.08892	4.04627e-09	1.24238e-07
						Syt15	35.6529	1.04985	4.10427e-08	1.32005e-06																				Mcm3	162.011	1.05821	4.07808e-09	1.25004e-07
						Rhoj	138.277	0.78305	4.24158e-08	1.35965e-06																				Rrm2	154.926	0.918143	4.13185e-09	1.2644e-07
						Zfp36	121.04	0.833947	4.26639e-08	1.36532e-06																				Ckap2l	92.3408	0.945923	4.64773e-09	1.41752e-07
						Mmd2	6153.63	0.33203	4.31242e-08	1.37775e-06																				Athl1	258.507	0.735407	4.68961e-09	1.42791e-07
						G6pdx	949.386	0.443687	4.45567e-08	1.41878e-06																				Bmf	122.579	0.72254	5.11965e-09	1.55625e-07
						Tnfrsf11a	81.1289	0.888757	4.54997e-08	1.44641e-06																				Jak3	250.342	0.827324	5.55989e-09	1.68727e-07
						Lfng	443.829	0.481957	4.62671e-08	1.46837e-06																				Dcxr	203.88	0.589246	5.73943e-09	1.73887e-07
						AB124611	28.3132	0.951084	4.82799e-08	1.52719e-06																				C3	147.82	0.98029	5.76017e-09	1.74226e-07
						Tspan15	531.731	0.51558	5.31122e-08	1.67177e-06																				Pla2g15	662.385	0.372249	5.77444e-09	1.74369e-07
						Ahnak	817.026	0.720528	5.32562e-08	1.67355e-06																				Phf11b	18.1003	1.05003	6.25612e-09	1.88292e-07
						Ptpn18	61.4105	0.923442	5.36116e-08	1.68196e-06																				Dnm2	1781.64	0.367733	6.26925e-09	1.88377e-07
						Kif4	65.3572	0.972479	5.49571e-08	1.71855e-06																				Gbp7	123.823	0.895613	6.6603e-09	1.99798e-07
						Prss23	467.638	0.611104	5.57806e-08	1.73863e-06																				Pmp22	479.635	0.74618	6.77591e-09	2.0292e-07
						Rrbp1	1787.5	0.552732	5.67709e-08	1.76663e-06																				Cyp1b1	130.529	0.930177	6.7866e-09	2.0292e-07
						Ecscr	115.02	0.872643	5.75663e-08	1.78847e-06																				Nr2e1	465.882	0.546155	7.54295e-09	2.24799e-07
						Adgrg6	51.1434	0.953536	5.80925e-08	1.8019e-06																				Plce1	526.966	0.682587	7.80891e-09	2.32347e-07
						Ptgs1	379.497	0.536353	5.828e-08	1.8048e-06																				Hmox1	625.517	0.898229	8.31632e-09	2.47042e-07
						Lap3	1435.45	0.469229	6.22545e-08	1.92477e-06																				Plin2	304.46	1.05522	8.47369e-09	2.51308e-07
						Adk	1452.16	0.456388	6.29379e-08	1.93964e-06																				Myo6	3805.48	0.405552	8.55244e-09	2.53233e-07
						Cyp4v3	232.755	0.571882	6.44762e-08	1.98386e-06																				Folh1	173.704	0.763804	9.49008e-09	2.80541e-07
						Prkcdbp	342.945	0.616334	6.56954e-08	2.01813e-06																				Eya4	90.6658	0.775396	9.50661e-09	2.80575e-07
						Pm20d1	55.8309	0.782013	7.38189e-08	2.26044e-06																				Ctla2b	35.9268	1.04509	9.55928e-09	2.81486e-07
						Ch25h	42.5225	0.946173	7.48458e-08	2.28823e-06																				Emp1	116.537	1.00891	9.56826e-09	2.81486e-07
						Spp1	1155.11	0.511659	7.72977e-08	2.34938e-06																				Rab13	158.023	0.75448	9.69236e-09	2.84678e-07
						Gsdmd	85.3946	0.871382	7.79278e-08	2.3636e-06																				Fam167a	135.366	0.926829	9.99862e-09	2.93202e-07
						Spc25	42.9701	0.892102	8.06413e-08	2.43819e-06																				Irf9	356.767	0.750103	1.0366e-08	3.03003e-07
						Stom	501.868	0.631425	8.88885e-08	2.68331e-06																				Lmf2	548.995	0.436109	1.04049e-08	3.03653e-07
						Prdx1	2266.6	0.540966	8.91835e-08	2.68798e-06																				Knstrn	93.1462	1.04952	1.11312e-08	3.23815e-07
						Sox6	640.458	0.530398	9.09475e-08	2.73685e-06																				Hadh	673.097	0.530801	1.13359e-08	3.29245e-07
						Rsu1	658.293	0.437996	1.00834e-07	3.02486e-06																				Efemp2	472.641	0.853177	1.18352e-08	3.43203e-07
						H2-Q4	90.698	0.887876	1.01343e-07	3.03539e-06																				Gpt2	1991.1	0.433684	1.27929e-08	3.69798e-07
						Pea15a	19576	0.378022	1.03676e-07	3.1004e-06																				Clec4a3	20.4874	1.08994	1.28525e-08	3.70937e-07
						Psmb9	40.5948	0.916801	1.06872e-07	3.19102e-06																				Ppard	527.562	0.382579	1.30525e-08	3.76115e-07
						Rcbtb2	884.619	0.412388	1.08582e-07	3.23702e-06																				Ppp1r3c	1546.9	0.583243	1.32293e-08	3.80609e-07
						Lpcat3	624.196	0.368543	1.12167e-07	3.33872e-06																				I830012O16Rik	94.5057	0.950808	1.37553e-08	3.95119e-07
						Pde3b	361.976	0.6504	1.17507e-07	3.48741e-06																				Trim25	188.044	0.838453	1.38736e-08	3.97892e-07
						Tns3	2589.47	0.412964	1.17526e-07	3.48741e-06																				Rcbtb2	884.619	0.440014	1.403e-08	4.01746e-07
						S100b	2929.22	0.393257	1.23579e-07	3.6557e-06																				Timp4	920.905	0.544984	1.46293e-08	4.18251e-07
						Nr2e1	465.882	0.500294	1.25006e-07	3.6922e-06																				Traf3ip3	33.3242	1.01147	1.46576e-08	4.18405e-07
						Mrps6	707.323	0.806754	1.2979e-07	3.82762e-06																				Ddah2	357.697	0.645256	1.47196e-08	4.1952e-07
						Itfg3	627.062	0.484499	1.32768e-07	3.9081e-06																				Cebpd	331.431	0.907871	1.48284e-08	4.21963e-07
						Hadh	673.097	0.490817	1.32927e-07	3.9081e-06																				Rasa4	176.53	0.684085	1.5076e-08	4.28343e-07
						Tmsb4x	20107.1	0.396931	1.40349e-07	4.11997e-06																				Rpl41	3636.27	0.41669	1.51854e-08	4.30778e-07
						Gpld1	1358.57	0.412879	1.43228e-07	4.19807e-06																				Fam20a	406.014	0.475224	1.52578e-08	4.32163e-07
						Tln1	1865.28	0.485055	1.46214e-07	4.27906e-06																				Tcf19	120.822	1.01901	1.67102e-08	4.7111e-07
						Pdgfrl	58.3846	0.857915	1.51911e-07	4.43224e-06																				Syngr2	290.035	0.647798	1.68738e-08	4.7499e-07
						Sp110	43.3415	0.923203	1.52647e-07	4.44696e-06																				Spc25	42.9701	0.957014	1.74545e-08	4.89825e-07
						Lmf2	548.995	0.400627	1.52996e-07	4.45035e-06																				Irgm2	102.913	0.883477	1.78895e-08	5.00495e-07
						Mcm3	162.011	0.933013	1.60918e-07	4.66661e-06																				Lima1	395.512	0.601995	1.80434e-08	5.04028e-07
						Sla	245.261	0.796103	1.66119e-07	4.80734e-06																				Mtmr11	289.465	0.739216	1.83122e-08	5.10257e-07
						Sparc	11559.6	0.476856	1.67529e-07	4.83551e-06																				Car5b	155.499	0.807517	1.83222e-08	5.10257e-07
						Farp1	1903.05	0.400505	1.68168e-07	4.84026e-06																				Ppp1r14b	196.323	0.670159	1.89124e-08	5.25892e-07
						Plk1	71.5201	0.940983	1.76272e-07	5.0659e-06																				Bco2	118.983	0.708401	2.04624e-08	5.68126e-07
						Il3ra	75.8135	0.81324	1.91553e-07	5.4886e-06																				G6pdx	949.386	0.45424	2.08851e-08	5.78983e-07
						Akna	199.877	0.597763	1.95714e-07	5.59947e-06																				Plk1	71.5201	1.01571	2.15805e-08	5.97356e-07
						Emid1	148.389	0.586103	1.97662e-07	5.64676e-06																				Gcnt1	95.3716	0.934656	2.17498e-08	6.01131e-07
						Neurl3	35.3324	0.965297	2.01065e-07	5.73543e-06																				Cdkn2c	100.994	0.987703	2.26029e-08	6.23738e-07
						Lilrb4	72.9043	0.536503	2.09749e-07	5.97425e-06																				Cxcl5	29.3137	1.02574	2.26361e-08	6.23738e-07
						Ccdc88b	182.948	0.699452	2.15087e-07	6.11721e-06																				Myd88	187.477	0.648825	2.26929e-08	6.24361e-07
						Slc25a10	510.746	0.471972	2.31873e-07	6.5751e-06																				Wdr81	1136.13	0.328229	2.37607e-08	6.52758e-07
						0610040J01Rik	138.794	0.775306	2.33046e-07	6.59861e-06																				Adk	1452.16	0.470592	2.39944e-08	6.5819e-07
						Npc2	1843.8	0.512786	2.34633e-07	6.62796e-06																				AK081274	744.648	0.370678	2.40498e-08	6.58718e-07
						Gng5	216.973	0.567549	2.34774e-07	6.62796e-06																				1810037I17Rik	820.482	0.432042	2.47009e-08	6.75541e-07
						Olig1	2777.28	0.511289	2.36726e-07	6.67325e-06																				Gm5089	108.287	0.729053	2.47933e-08	6.77055e-07
						Pyroxd2	99.7042	0.829206	2.38883e-07	6.72416e-06																				Ppap2b	7608.42	0.341624	2.49646e-08	6.80713e-07
						Knstrn	93.1462	0.932481	2.51429e-07	7.05658e-06																				Plxdc2	932.226	0.558662	2.55467e-08	6.94948e-07
						Muc1	34.6855	0.864736	2.5285e-07	7.08608e-06																				Frmd8	697.696	0.646622	2.55627e-08	6.94948e-07
						Scgb3a1	12.0477	0.951205	2.60704e-07	7.28489e-06																				Cmtm3	283.58	0.735346	2.6743e-08	7.24879e-07
						Kif11	103.728	0.94026	2.7491e-07	7.67066e-06																				Slc35b2	662.457	0.361195	2.76092e-08	7.47248e-07
						Cchcr1	150.642	0.868913	2.80794e-07	7.81209e-06																				Cd302	240.122	0.66025	2.81669e-08	7.61214e-07
						Plcb2	134.138	0.738081	2.81318e-07	7.81533e-06																				Atoh8	81.6203	0.827828	2.84446e-08	7.67585e-07
						Edem1	583.454	0.607448	2.86186e-07	7.91615e-06																				Cmtm6	707.343	0.507968	2.89155e-08	7.7914e-07
						Cryba4	29.6476	0.934675	2.92247e-07	8.07216e-06																				Cdca8	72.2895	1.00055	2.91868e-08	7.85131e-07
						Ltbr	293.142	0.727672	2.92911e-07	8.07887e-06																				Slc1a3	19760.7	0.445293	2.92238e-08	7.85131e-07
						Tspo	174.312	0.844761	3.02571e-07	8.30944e-06																				Vasp	373.87	0.521971	2.98196e-08	7.99962e-07
						Scarb2	1722.14	0.373714	3.10646e-07	8.519e-06																				Sox6	640.458	0.549615	3.02067e-08	8.0916e-07
						Pcsk6	865.699	0.455495	3.24387e-07	8.8831e-06																				Dna2	63.5818	0.924288	3.02996e-08	8.1046e-07
						Uba7	171.175	0.708216	3.29255e-07	9.00356e-06																				Trim47	83.8925	0.996307	3.13876e-08	8.38334e-07
						Ticam1	208.918	0.514918	3.6503e-07	9.91114e-06																				Fblim1	48.7374	1.0244	3.24058e-08	8.64266e-07
						Pnp	576.997	0.608861	3.67059e-07	9.95125e-06																				Il6ra	165.708	0.658476	3.34058e-08	8.88341e-07
						Sh3tc1	54.4475	0.83895	3.67546e-07	9.95125e-06																				Cdkn1a	191.403	0.819763	3.80424e-08	1.0087e-06
						Lrrc25	34.5283	0.943561	3.78259e-07	1.02269e-05																				Sdsl	105.268	0.686282	4.01963e-08	1.06119e-06
						Vcan	654.999	0.590266	3.80471e-07	1.02719e-05																				Nuf2	132.286	0.934677	4.14014e-08	1.08986e-06
						Gfpt2	191.501	0.727091	3.80996e-07	1.02719e-05																				Atf3	44.4696	0.983724	4.1499e-08	1.09086e-06
						Atoh8	81.6203	0.755409	4.0959e-07	1.10118e-05																				Aim2	55.9358	0.941687	4.24339e-08	1.11383e-06
						Daam2	3290.66	0.452247	4.19568e-07	1.12643e-05																				1810011H11Rik	31.3358	1.02613	4.35174e-08	1.14063e-06
						Efemp2	472.641	0.755295	4.31331e-07	1.15477e-05																				Pabpc1	2940.41	0.378107	4.39567e-08	1.15049e-06
						Loxl3	208.014	0.613083	4.35494e-07	1.16429e-05																				Pcsk6	865.699	0.487679	4.41459e-08	1.15379e-06
						Nfkb2	91.9025	0.790757	4.42102e-07	1.18031e-05																				Ptgfrn	483.116	0.734497	4.58581e-08	1.19683e-06
						Rin3	73.5609	0.782029	4.49195e-07	1.19592e-05																				Galnt1	1218.59	0.46325	4.68542e-08	1.22108e-06
						Fam111a	106.281	0.91501	4.53597e-07	1.20263e-05																				Lrrc25	34.5283	1.02267	4.90304e-08	1.27598e-06
						Slc1a4	2329.7	0.452897	4.55397e-07	1.20573e-05																				Ncan	7190.48	0.398418	4.97008e-08	1.29158e-06
						Cd38	261.65	0.524511	4.5903e-07	1.21368e-05																				Cib1	331.854	0.507593	5.28259e-08	1.3689e-06
						Hhex	43.6517	0.916647	4.61965e-07	1.21975e-05																				Arhgap4	191.217	0.759429	6.04101e-08	1.56101e-06
						Epsti1	34.4153	0.860575	5.42383e-07	1.42349e-05																				Atp13a4	548.577	0.440977	6.05916e-08	1.56128e-06
						1810037I17Rik	820.482	0.388789	5.42839e-07	1.42349e-05																				Cdca3	84.4688	0.891957	6.31241e-08	1.62196e-06
						Mamdc2	57.4077	0.788632	5.67024e-07	1.48487e-05																				Rlbp1	565.767	0.38742	6.33511e-08	1.62323e-06
						Susd3	52.9285	0.810372	5.84239e-07	1.5226e-05																				Slfn2	64.5028	0.98262	6.352e-08	1.62528e-06
						Tm4sf1	313.478	0.732985	5.96309e-07	1.54887e-05																				Gngt2	100.96	0.92155	6.38215e-08	1.63071e-06
						Tjp2	966.386	0.341467	6.08196e-07	1.57761e-05																				Sctr	37.1596	0.933271	6.56786e-08	1.67347e-06
						Csk	736.541	0.401741	6.09744e-07	1.57949e-05																				Tnfrsf11a	81.1289	0.876712	6.74594e-08	1.71407e-06
						Dok1	62.3534	0.750108	6.30809e-07	1.63185e-05																				Tap2	263.716	0.556965	6.76562e-08	1.71668e-06
						Adipor2	1431.24	0.36072	6.34993e-07	1.63758e-05																				Gstm1	5492.34	0.382342	7.02549e-08	1.77277e-06
						Plin2	304.46	0.897035	6.35452e-07	1.63758e-05																				Cln3	381.337	0.382758	7.24448e-08	1.82551e-06
						Myo1e	429.493	0.61042	6.37979e-07	1.64153e-05																				AB124611	28.3132	0.930712	7.32723e-08	1.84382e-06
						Ip6k3	20.6704	0.95069	6.4506e-07	1.65531e-05																				Tjp2	966.386	0.368018	7.34489e-08	1.84572e-06
						Adamtsl4	221.745	0.741742	6.55611e-07	1.68013e-05																				Stat1	728.99	0.641037	7.54803e-08	1.89416e-06
						Anxa2	470.962	0.897858	6.75774e-07	1.72949e-05																				Atp6v0a2	2201.22	0.341394	7.59934e-08	1.90442e-06
						Ctsc	516.878	0.761575	6.77337e-07	1.73118e-05																				Cchcr1	150.642	0.910506	7.70102e-08	1.92726e-06
						Gmfg	18.7744	0.905277	6.84107e-07	1.74616e-05																				Lfng	443.829	0.473136	8.06555e-08	2.00749e-06
						Col5a3	181.649	0.722043	6.89272e-07	1.757e-05																				Gmip	300.853	0.594576	8.28759e-08	2.05995e-06
						Eya4	90.6658	0.670732	7.22839e-07	1.83768e-05																				Tmsb4x	20107.1	0.404083	8.33322e-08	2.06847e-06
						Cyp1b1	130.529	0.791857	7.37468e-07	1.87239e-05																				Loxl3	208.014	0.649536	8.37728e-08	2.07433e-06
						Arhgap11a	119.417	0.868286	7.82094e-07	1.98045e-05																				Myh9	3568.7	0.323025	8.37955e-08	2.07433e-06
						Tnni1	68.0843	0.766387	7.88621e-07	1.99434e-05																				Fgfrl1	718.69	0.678727	8.55295e-08	2.10869e-06
						Il6st	1870.32	0.338477	7.99222e-07	2.01416e-05																				Atf5	457.166	0.478386	9.17458e-08	2.2498e-06
						Ralb	474.395	0.426522	7.99612e-07	2.01416e-05																				Mgll	6510.51	0.387912	9.42373e-08	2.30471e-06
						Clspn	65.0725	0.873817	8.13059e-07	2.04534e-05																				Ch25h	42.5225	0.935042	9.76144e-08	2.38411e-06
						Vamp3	713.029	0.416918	8.21085e-07	2.06283e-05																				Bmp2k	413.896	0.614279	9.89731e-08	2.41407e-06
						Gba	1099.04	0.324247	8.29866e-07	2.08216e-05																				Pde3b	361.976	0.653618	1.00764e-07	2.45447e-06
						Kif22	65.4574	0.893487	8.45594e-07	2.11608e-05																				Cyb5a	957.736	0.410751	1.03419e-07	2.51098e-06
						Racgap1	209.836	0.83168	8.71836e-07	2.17607e-05																				Dap	219.91	0.786533	1.05266e-07	2.55054e-06
						Xlr	25.0152	0.883177	9.15767e-07	2.28275e-05																				Prcp	189.497	0.595782	1.07249e-07	2.59514e-06
						Elk3	236.385	0.604668	9.2597e-07	2.30219e-05																				Tril	1759.33	0.552271	1.077e-07	2.60262e-06
						Lmcd1	174.169	0.623296	9.54818e-07	2.36778e-05																				Ptafr	24.9295	0.976566	1.11552e-07	2.69213e-06
						Fblim1	48.7374	0.884666	9.98276e-07	2.47235e-05																				abParts	344.282	0.788404	1.13286e-07	2.73037e-06
						Mxra7	409.05	0.413664	1.00464e-06	2.48489e-05																				Tapbp	806.025	0.556575	1.16252e-07	2.79778e-06
						Hspb8	634.693	0.605785	1.0521e-06	2.59559e-05																				Fam111a	106.281	0.968723	1.16389e-07	2.79778e-06
						Gadd45g	384.876	0.571865	1.06278e-06	2.61857e-05																				Gstk1	217.385	0.500871	1.16668e-07	2.80081e-06
						Shisa8	29.5103	0.899832	1.12769e-06	2.76782e-05																				Gabarap	4093.96	0.327777	1.24793e-07	2.98799e-06
						Tnfrsf12a	96.7336	0.872942	1.12977e-06	2.76939e-05																				Clspn	65.0725	0.947885	1.26039e-07	3.01387e-06
						Nek6	1355.78	0.478051	1.14255e-06	2.79357e-05																				Rin2	800.874	0.471805	1.28809e-07	3.07608e-06
						Rhog	721.531	0.635047	1.15032e-06	2.80897e-05																				Il3ra	75.8135	0.824408	1.29297e-07	3.08373e-06
						Cenpa	59.0129	0.869213	1.17721e-06	2.87098e-05																				Myo10	1513.43	0.4189	1.32832e-07	3.16134e-06
						Slc16a1	990.698	0.524966	1.19571e-06	2.91241e-05																				Gtse1	48.026	0.981694	1.32898e-07	3.16134e-06
						Cd302	240.122	0.577789	1.22703e-06	2.9849e-05																				Psph	406.176	0.44379	1.36914e-07	3.25264e-06
						Brca1	59.1305	0.838971	1.2563e-06	3.04065e-05																				Xaf1	121.817	0.76742	1.37156e-07	3.25416e-06
						Trim14	39.5778	0.868319	1.37107e-06	3.30591e-05																				Il17ra	275.656	0.609282	1.37934e-07	3.26838e-06
						Trim47	83.8925	0.858751	1.44372e-06	3.47671e-05																				Fgl2	71.3792	0.839115	1.46908e-07	3.46751e-06
						Palld	242.546	0.588634	1.46286e-06	3.5184e-05																				Bhlhe41	813.772	0.458459	1.47913e-07	3.48675e-06
						Plekha4	46.6716	0.861324	1.47024e-06	3.53171e-05																				Pnp	576.997	0.628262	1.53377e-07	3.60624e-06
						Tnfrsf19	1798.82	0.335863	1.47774e-06	3.54529e-05																				Itfg3	627.062	0.481537	1.56938e-07	3.68523e-06
						Tmem86a	466.096	0.55729	1.50213e-06	3.59929e-05																				Renbp	117.189	0.90138	1.64348e-07	3.84932e-06
						Dtx3l	174.758	0.61719	1.51908e-06	3.63536e-05																				Pdia4	1421.97	0.363003	1.69242e-07	3.95382e-06
						Snx20	43.1421	0.868448	1.59214e-06	3.80072e-05																				Lrrc3	256.309	0.641132	1.70352e-07	3.97467e-06
						Renbp	117.189	0.823128	1.61009e-06	3.83878e-05																				Kif23	48.0458	0.977654	1.72285e-07	4.01463e-06
						Galnt1	1218.59	0.407128	1.61214e-06	3.83889e-05																				Anxa4	143.431	0.792217	1.72525e-07	4.01511e-06
						Trim30d	57.9368	0.863089	1.7119e-06	4.06506e-05																				Nfatc1	189.517	0.697234	1.73062e-07	4.02248e-06
						Brip1os	384.528	0.625313	1.71958e-06	4.06945e-05																				Ahnak	817.026	0.691893	1.73706e-07	4.03232e-06
						Rhbdf1	529.89	0.659042	1.77099e-06	4.1808e-05																				Slc29a3	502.795	0.418072	1.7707e-07	4.1052e-06
						Syngr2	290.035	0.547406	1.95368e-06	4.58947e-05																				Rftn2	1038.2	0.361469	1.78306e-07	4.1286e-06
						Nrros	231.357	0.603217	1.96507e-06	4.61057e-05																				Cenpa	59.0129	0.93578	1.91237e-07	4.41125e-06
						Stk17b	138.329	0.701463	1.98886e-06	4.6607e-05																				Psat1	3040.24	0.473512	1.94047e-07	4.47043e-06
						Parp14	121.734	0.811373	1.99805e-06	4.6765e-05																				Rrbp1	1787.5	0.529807	1.95243e-07	4.49232e-06
						Sun2	863.539	0.40662	2.08397e-06	4.86573e-05																				Gfpt2	191.501	0.744657	1.96431e-07	4.50829e-06
						Srgn	159.419	0.729423	2.10815e-06	4.91619e-05																				Itpripl2	182.606	0.696033	2.00797e-07	4.60271e-06
						Arhgef40	771.256	0.411816	2.12017e-06	4.93822e-05																				Ifitm2	263.024	0.763129	2.03323e-07	4.64894e-06
						Folh1	173.704	0.630771	2.19071e-06	5.09015e-05																				Zfp703	546.719	0.582447	2.05015e-07	4.68178e-06
						Nfatc1	189.517	0.631603	2.23797e-06	5.18737e-05																				Pttg1ip	1586.26	0.34758	2.0947e-07	4.77755e-06
						Ptafr	24.9295	0.858676	2.25987e-06	5.23181e-05																				Zc3h12a	30.1502	0.918666	2.12844e-07	4.84843e-06
						P2rx4	275.721	0.465436	2.27245e-06	5.2546e-05																				Edem2	677.415	0.3781	2.15477e-07	4.90229e-06
						Cfh	658.048	0.652235	2.30252e-06	5.31771e-05																				Papss2	538.935	0.506829	2.19744e-07	4.99315e-06
						Sh3pxd2b	588.464	0.464135	2.32124e-06	5.35449e-05																				Daam2	3290.66	0.462298	2.30549e-07	5.22569e-06
						Lect1	52.6857	0.879156	2.34289e-06	5.39535e-05																				Tec	50.6037	0.855761	2.30961e-07	5.22854e-06
						Nek2	56.1684	0.860228	2.39453e-06	5.49406e-05																				Racgap1	209.836	0.874504	2.43401e-07	5.49653e-06
						Gpt2	1991.1	0.359908	2.39607e-06	5.49406e-05																				Msrb1	482.833	0.377147	2.47094e-07	5.57304e-06
						Anxa4	143.431	0.713511	2.48065e-06	5.68119e-05																				Rcn3	261.758	0.549728	2.52778e-07	5.6942e-06
						Lhfpl3	567.919	0.573328	2.51388e-06	5.75043e-05																				Nfkb2	91.9025	0.806807	2.55426e-07	5.7397e-06
						Gem	54.104	0.763632	2.6665e-06	6.08501e-05																				Xdh	99.0761	0.922789	2.55991e-07	5.74257e-06
						Kif23	48.0458	0.860058	2.71145e-06	6.18023e-05																				C530044C16Rik	26.7287	0.940065	2.56182e-07	5.74257e-06
						Edem2	677.415	0.341879	2.85873e-06	6.46977e-05																				Parp12	287.102	0.61985	2.61641e-07	5.85774e-06
						Plin3	555.395	0.527808	2.91821e-06	6.58884e-05																				Zcchc24	2385.08	0.3794	2.69087e-07	6.01707e-06
						Nkx2-2	116.354	0.685812	2.95203e-06	6.65735e-05																				Hmgb2	51.7167	0.952823	2.72604e-07	6.08827e-06
						Tril	1759.33	0.485783	2.97388e-06	6.69875e-05																				Phka1	997.399	0.364923	2.84416e-07	6.33659e-06
						Gpr160	26.9676	0.858713	2.99234e-06	6.73241e-05																				Anxa2	470.962	0.929688	2.88733e-07	6.4171e-06
						Ltbp1	217.952	0.478862	3.024e-06	6.79568e-05																				Def6	52.4175	0.823351	2.92372e-07	6.49008e-06
						Gtse1	48.026	0.850502	3.12775e-06	7.02058e-05																				Ctla2a	137.252	0.913805	2.99416e-07	6.63839e-06
						4931406C07Rik	738.098	0.361197	3.13608e-06	7.03106e-05																				Eci2	785.185	0.367698	3.03038e-07	6.71055e-06
						Kazn	1272.6	0.342614	3.2431e-06	7.24556e-05																				Nkx2-2	116.354	0.751144	3.06973e-07	6.78945e-06
						Reep3	891.652	0.41695	3.34398e-06	7.45357e-05																				Tnfrsf19	1798.82	0.356709	3.12496e-07	6.90325e-06
						Wwtr1	478.567	0.573957	3.42974e-06	7.61816e-05																				Rapgef3	1009.95	0.458836	3.17789e-07	7.00325e-06
						Plau	68.5642	0.774993	3.43872e-06	7.62926e-05																				Ftl1	4205.63	0.828439	3.40193e-07	7.47249e-06
						Itpripl2	182.606	0.621185	3.5439e-06	7.83541e-05																				Igdcc4	1830.16	0.423363	3.40309e-07	7.47249e-06
						Plce1	526.966	0.548142	3.61732e-06	7.96102e-05																				Gm20743	44.0128	0.84001	3.41261e-07	7.4844e-06
						Ccna2	143.457	0.818807	3.69955e-06	8.13265e-05																				Mfap3l	1652.12	0.458491	3.52255e-07	7.71625e-06
						Ethe1	210.719	0.43225	3.7065e-06	8.1386e-05																				Irf7	75.5868	0.956277	3.58057e-07	7.82458e-06
						Cd109	246.755	0.696064	3.72378e-06	8.16718e-05																				Eif2ak2	231.458	0.830482	3.72984e-07	8.13132e-06
						Fmnl3	350.963	0.538941	4.07686e-06	8.85044e-05																				Tifa	145.684	0.630885	3.79719e-07	8.26829e-06
						Spidr	192.69	0.652664	4.1901e-06	9.0702e-05																				Itga5	101.155	0.945174	3.85379e-07	8.37157e-06
						Sh3glb1	2037.81	0.343873	4.26346e-06	9.2034e-05																				Ccna2	143.457	0.914667	4.04216e-07	8.75992e-06
						Slc7a2	857.922	0.456276	4.33198e-06	9.3408e-05																				Trim12c	97.9205	0.749321	4.11402e-07	8.9051e-06
						Wipi1	493.751	0.333216	4.3681e-06	9.4081e-05																				Ticam1	208.918	0.512334	4.12698e-07	8.92258e-06
						Ncaph	59.358	0.831844	4.50905e-06	9.68218e-05																				Palld	242.546	0.618179	4.16238e-07	8.98847e-06
						1810011H11Rik	31.3358	0.83754	4.51051e-06	9.68218e-05																				Csk	736.541	0.40709	4.25791e-07	9.18391e-06
						Dera	79.1136	0.650429	4.60405e-06	9.83891e-05																				Dbx2	567.243	0.482871	4.29647e-07	9.24526e-06
						C1qtnf1	163.241	0.751067	4.67651e-06	9.96045e-05																				Edem1	583.454	0.598097	4.32116e-07	9.26565e-06
						Prrx2	22.666	0.840641	4.74169e-06	0.000100769																				Prdx1	2266.6	0.511179	4.34358e-07	9.29191e-06
						Adam17	482.425	0.460451	5.06711e-06	0.000107446																				Pnpla2	521.395	0.421187	4.38845e-07	9.36597e-06
						Folr2	26.9193	0.863983	5.14419e-06	0.000108892																				Sox8	870.334	0.328383	4.48874e-07	9.56882e-06
						Lbh	1217.16	0.358379	5.24858e-06	0.000110926																				Prkd3	572.366	0.416167	4.52961e-07	9.6447e-06
						Def6	52.4175	0.72891	5.40441e-06	0.000114094																				Rpl29	1401.19	0.37757	4.57389e-07	9.72764e-06
						Cdk5rap2	524.267	0.44125	5.46045e-06	0.00011515																				Pald1	514.142	0.375985	4.62044e-07	9.81521e-06
						Prkd3	572.366	0.375003	5.65587e-06	0.000119009																				Pik3ip1	939.513	0.344429	4.69283e-07	9.95741e-06
						Gareml	515.872	0.490716	5.66295e-06	0.000119028																				Rinl	79.3639	0.710244	4.78038e-07	1.01314e-05
						Mgll	6510.51	0.329904	5.6728e-06	0.000119104																				Gm5086	26.703	0.920621	4.78737e-07	1.01345e-05
						Eif4ebp1	65.9655	0.789299	5.84916e-06	0.000122138																				Lpxn	56.2908	0.887678	4.8393e-07	1.02325e-05
						Ahnak2_	43.1536	0.851464	5.90543e-06	0.000123179																				Lrp4	1379.85	0.365429	4.93022e-07	1.04127e-05
						Cmtm6	707.343	0.41459	6.18089e-06	0.000128505																				Nek6	1355.78	0.493779	4.99401e-07	1.05353e-05
						Hip1	1544.4	0.374811	6.2242e-06	0.000129265																				AK080484	124.18	0.582826	5.10755e-07	1.07624e-05
						Piezo2	51.8904	0.78626	6.2535e-06	0.000129733																				Lap3	1435.45	0.435233	5.18238e-07	1.09075e-05
						Lgals3	149.988	0.76827	6.75184e-06	0.000139018																				Gba	1099.04	0.329928	5.23745e-07	1.10107e-05
						Man2b1	1633.56	0.374504	6.81131e-06	0.000140092																				Serpine2	4495.45	0.394044	5.2811e-07	1.10897e-05
						Litaf	470.811	0.516592	6.86873e-06	0.000141122																				Myl9	409.248	0.709534	5.3042e-07	1.11254e-05
						Asrgl1	4740.7	0.364409	6.91303e-06	0.000141728																				Plau	68.5642	0.838373	5.40446e-07	1.13227e-05
						Slc44a1	1782.41	0.525817	6.99972e-06	0.000143352																				Endou	44.3449	0.905358	5.53374e-07	1.1567e-05
						Galnt6	437.123	0.669987	7.21968e-06	0.000147542																				Mpst	565.16	0.390703	5.78648e-07	1.20815e-05
						Jam2	1234.77	0.502227	7.24602e-06	0.000147871																				Cdk4	1136.44	0.374759	5.93428e-07	1.2376e-05
						Uhrf1	105.63	0.761307	7.33043e-06	0.000149011																				Xlr	25.0152	0.901028	6.08161e-07	1.26543e-05
						Gbp7	123.823	0.689353	7.53198e-06	0.000152784																				Fabp7	1311.98	0.892856	6.18345e-07	1.28516e-05
						H2-Q7	13.1255	0.799311	7.57306e-06	0.000153455																				Sprr1a	16.6484	0.81051	6.20054e-07	1.28725e-05
						Irgm2	102.913	0.699412	7.69942e-06	0.00015585																				Clec5a	70.6063	0.873667	6.26874e-07	1.29993e-05
						Dbf4	45.7815	0.798377	7.70789e-06	0.000155857																				Eml3	358.876	0.423542	6.29436e-07	1.30376e-05
						Ssc5d	130.829	0.670773	7.7381e-06	0.000156303																				Igfbp5	1997.47	0.670432	6.36195e-07	1.31627e-05
						Nop9	323.429	0.44638	7.79222e-06	0.000157231																				Wwtr1	478.567	0.615062	6.44508e-07	1.33171e-05
						Rhoa	3194.5	0.360007	7.81289e-06	0.000157482																				Rhoa	3194.5	0.40063	6.48681e-07	1.33756e-05
						Trim30a	120.853	0.796693	7.89776e-06	0.000159025																				Snx20	43.1421	0.900831	6.83199e-07	1.40398e-05
						Slc25a18	1881.6	0.440085	8.10753e-06	0.000163078																				Ifit3	179.488	0.891227	6.9927e-07	1.43378e-05
						Nme2	1169.06	0.33134	8.19221e-06	0.000164264																				Cfb	14.3157	0.887344	7.14903e-07	1.46255e-05
						Serpine1	39.3987	0.572198	8.28445e-06	0.000165601																				Mxra8	241.147	0.663815	7.17546e-07	1.46631e-05
						Rfx4	430.662	0.389089	8.28481e-06	0.000165601																				Fam63a	627.488	0.358557	7.46825e-07	1.52104e-05
						Gatsl3	82.9334	0.637064	8.55317e-06	0.000170255																				Fxyd5	328.228	0.722609	7.52848e-07	1.5299e-05
						Ccdc3	534.499	0.654694	8.63114e-06	0.000171629																				Lacc1	190.748	0.608484	7.58401e-07	1.53947e-05
						Slc1a3	19760.7	0.356987	8.74306e-06	0.000173674																				Thrsp	798.845	0.349359	7.60038e-07	1.54064e-05
						Lacc1	190.748	0.547325	8.8778e-06	0.000176168																				Isg15	36.49	0.952003	7.81453e-07	1.57924e-05
						Cdt1	43.6738	0.801033	9.52475e-06	0.000188033																				1700017B05Rik	706.543	0.415876	7.85041e-07	1.58474e-05
						Tpt1	1097.91	0.473713	9.5452e-06	0.000188243																				Rras	199.63	0.578573	7.99336e-07	1.61182e-05
						Tfeb	238.19	0.549585	9.5735e-06	0.000188607																				Slc46a3	174.399	0.521977	8.40573e-07	1.69124e-05
						Ugp2	2177.33	0.440911	9.66009e-06	0.000190117																				Ltbr	293.142	0.698483	8.44585e-07	1.69744e-05
						Msrb1	482.833	0.324311	9.71365e-06	0.00019078																				Ang	55.7781	0.868374	8.5264e-07	1.71175e-05
						Tagap	37.4262	0.781529	1.03733e-05	0.000202285																				Cbr2	35.7242	0.88962	8.62814e-07	1.73027e-05
						Smim3	353.5	0.561805	1.0638e-05	0.000207025																				Tmem100	358.395	0.547932	8.9584e-07	1.79256e-05
						Tapbp	806.025	0.462625	1.07656e-05	0.000209296																				Pfkfb4	408.313	0.390879	9.0508e-07	1.80907e-05
						Cfb	14.3157	0.746516	1.09324e-05	0.000212108																				H2-Eb1	56.6942	0.927441	9.43129e-07	1.87896e-05
						Greb1	19.749	0.821794	1.10693e-05	0.000214548																				F3	1042.28	0.461381	9.72618e-07	1.93559e-05
						Il6ra	165.708	0.525045	1.14039e-05	0.000220143																				Slc12a9	988.009	0.37961	1.00492e-06	1.99771e-05
						Egln3	115.082	0.618882	1.15499e-05	0.000222736																				Pole	96.9417	0.80376	1.01786e-06	2.01904e-05
						Clec4a3	20.4874	0.797036	1.17402e-05	0.000225724																				Ncaph	59.358	0.895691	1.02561e-06	2.0322e-05
						Itga5	101.155	0.803323	1.17578e-05	0.000225836																				Tnfrsf12a	96.7336	0.873452	1.10269e-06	2.1802e-05
						Parvg	398.967	0.474901	1.1902e-05	0.000228378																				Spidr	192.69	0.690723	1.11359e-06	2.19937e-05
						Smtn	175.443	0.589371	1.21352e-05	0.000232386																				BC064078	73.7606	0.782233	1.12973e-06	2.22884e-05
						Snx5	1976.86	0.414124	1.22563e-05	0.000234238																				Bgn	521.914	0.656061	1.15403e-06	2.27432e-05
						Lpin3	54.7214	0.765372	1.27835e-05	0.000243828																				Lpin3	54.7214	0.854442	1.23143e-06	2.42163e-05
						Tgfbr2	539.293	0.601149	1.29368e-05	0.000246507																				Ifitm10	580.583	0.44655	1.2464e-06	2.44845e-05
						Igsf11	892.868	0.447011	1.29694e-05	0.000246883																				Tgfbi	183.696	0.878467	1.25352e-06	2.45979e-05
						Casp8	106.869	0.758288	1.34951e-05	0.000256126																				Eif4ebp1	65.9655	0.84623	1.26865e-06	2.48412e-05
						Phf11b	18.1003	0.673906	1.39924e-05	0.000265021																				Kif22	65.4574	0.876059	1.295e-06	2.53302e-05
						Ednrb	1452.47	0.53743	1.40998e-05	0.000266286																				Lgals3	149.988	0.846973	1.3029e-06	2.54466e-05
						Sall3	168.834	0.531895	1.42116e-05	0.000268133																				Lrg1	37.9602	0.876444	1.31152e-06	2.55711e-05
						St6gal1	692.227	0.367533	1.48068e-05	0.000278812																				Slc1a4	2329.7	0.434056	1.33499e-06	2.59733e-05
						Rin2	800.874	0.387273	1.50674e-05	0.000282887																				Sall3	168.834	0.590629	1.38317e-06	2.68821e-05
						Bag3	280.329	0.461428	1.51961e-05	0.000285023																				Hacl1	166.686	0.532096	1.38467e-06	2.68825e-05
						Pstpip1	72.1354	0.695986	1.52933e-05	0.000286286																				Naglu	370.164	0.540231	1.45978e-06	2.82209e-05
						Slfn2	64.5028	0.743606	1.53376e-05	0.000286836																				Alox5	33.0951	0.883972	1.4989e-06	2.88854e-05
						Xdh	99.0761	0.764841	1.5357e-05	0.000286919																				Flna	4243.12	0.401658	1.5023e-06	2.889e-05
						Mtmr10	596.934	0.332201	1.57666e-05	0.000293427																				Prkcdbp	342.945	0.548925	1.5216e-06	2.91997e-05
						Hapln1	646.35	0.39605	1.57974e-05	0.000293716																				Dhx58	54.7401	0.894454	1.5449e-06	2.9535e-05
						mKIAA1554_	226.791	0.680332	1.58955e-05	0.000295253																				Ehd4	284.117	0.675265	1.54554e-06	2.9535e-05
						Gmip	300.853	0.479682	1.5986e-05	0.000296646																				Adgre5	292.972	0.48178	1.62558e-06	3.09674e-05
						Triobp	263.174	0.526786	1.60446e-05	0.000297446																				Sla	245.261	0.728261	1.63605e-06	3.11019e-05
						P4hb	3155.73	0.350055	1.63581e-05	0.000302673																				Cdc42ep4	1173.24	0.433342	1.65037e-06	3.13417e-05
						Pth1r	179.917	0.590323	1.64517e-05	0.000303818																				Bag3	280.329	0.51015	1.66756e-06	3.16352e-05
						Tinf2	267.162	0.420517	1.6692e-05	0.000307368																				0610040J01Rik	138.794	0.717527	1.66942e-06	3.16375e-05
						Arhgap22	133.304	0.524399	1.75308e-05	0.000322194																				Dok1	62.3534	0.720558	1.6899e-06	3.1961e-05
						St14	22.5107	0.791182	1.79077e-05	0.000328176																				Arhgap11a	119.417	0.839659	1.68998e-06	3.1961e-05
						Hacd2	894.368	0.348351	1.79603e-05	0.000328825																				Uhrf1	105.63	0.828395	1.75568e-06	3.31348e-05
						Slc29a3	502.795	0.344215	1.81859e-05	0.000332638																				Traf4	356.993	0.386435	1.97328e-06	3.70122e-05
						Parp9	147.129	0.659586	1.93254e-05	0.000352809																				Lhfp	399.673	0.471373	2.05895e-06	3.85004e-05
						Oas1a	35.7623	0.696953	2.00872e-05	0.000366366																				Stat6	240.462	0.639282	2.16098e-06	4.02847e-05
						Tead3	102.296	0.57431	2.01391e-05	0.000366963																				Ndrg2	21068.5	0.355617	2.22625e-06	4.13546e-05
						Pmf1	89.6594	0.686795	2.01772e-05	0.00036731																				Stk17b	138.329	0.697833	2.22743e-06	4.13546e-05
						Cav2	649.12	0.592726	2.02639e-05	0.000368537																				Jam2	1234.77	0.529567	2.23191e-06	4.13956e-05
						Naglu	370.164	0.478253	2.05215e-05	0.000372869																				Rgma	1231.57	0.408319	2.272e-06	4.20966e-05
						Pole	96.9417	0.696923	2.10545e-05	0.000381829																				Slc16a1	990.698	0.510761	2.2961e-06	4.24569e-05
						Gamt	303.295	0.425797	2.1384e-05	0.000387438																				Plekhg2	207.185	0.786743	2.30594e-06	4.25826e-05
						Rfc4	58.5442	0.695193	2.15832e-05	0.000390678																				Cdt1	43.6738	0.859596	2.30756e-06	4.25826e-05
						Plscr2	68.7309	0.783521	2.20875e-05	0.000399053																				Pdgfrl	58.3846	0.768778	2.3575e-06	4.34166e-05
						Notch1	1058.64	0.450622	2.25103e-05	0.00040631																				AK199358	119.895	0.611066	2.36609e-06	4.35309e-05
						Ldlrap1	107.84	0.644072	2.2715e-05	0.000409617																				Neurl3	35.3324	0.86506	2.39597e-06	4.40363e-05
						Arhgap4	191.217	0.593587	2.28333e-05	0.000411364																				Rtp4	60.4623	0.894302	2.43452e-06	4.46997e-05
						Hmgb2	51.7167	0.763494	2.32624e-05	0.000418308																				Brip1os	384.528	0.614601	2.56406e-06	4.69366e-05
						Ubtd1	262.537	0.420558	2.42286e-05	0.000433903																				H2-Aa	61.1627	0.897566	2.5797e-06	4.71757e-05
						Lrig1	1102.91	0.515432	2.42428e-05	0.000433903																				Map3k14	139.817	0.634484	2.63389e-06	4.81186e-05
						Elovl1	484.478	0.432602	2.48865e-05	0.000444181																				St6gal1	692.227	0.398123	2.64453e-06	4.82646e-05
						Rps4x	2994.48	0.394051	2.52036e-05	0.000448328																				Tgfbr2	539.293	0.646773	2.71014e-06	4.93634e-05
						V00821	31.0115	0.741682	2.52125e-05	0.000448328																				P2rx4	275.721	0.46055	2.87664e-06	5.224e-05
						Chst7	61.8156	0.618574	2.55751e-05	0.000453934																				Elovl5	1779.18	0.37796	2.88152e-06	5.22766e-05
						Col2a1	54.0382	0.725544	2.57201e-05	0.000456086																				Tmem47	3071.9	0.384794	2.99811e-06	5.42792e-05
						Soat1	595.739	0.466538	2.66114e-05	0.000471019																				Reep3	891.652	0.418836	3.00082e-06	5.42792e-05
						E130114P18Rik	138.544	0.541211	2.71719e-05	0.000480053																				Myh15	71.4887	0.70911	3.01019e-06	5.43948e-05
						Bco2	118.983	0.530619	2.88075e-05	0.00050615																				Casp8	106.869	0.815163	3.04854e-06	5.50333e-05
						Zfp488	124.854	0.612094	2.89105e-05	0.000507031																				Tmem37	40.3966	0.852684	3.10767e-06	5.5935e-05
						Incenp	357.853	0.495904	2.90761e-05	0.000509004																				Vcl	1479.61	0.336101	3.15073e-06	5.65984e-05
						Gpx7	94.3929	0.599861	2.9418e-05	0.000514051																				Arid5a	320.373	0.484654	3.15978e-06	5.67054e-05
						2610034B18Rik	403.865	0.406917	3.01206e-05	0.000524415																				Acsf2	328.339	0.554026	3.16878e-06	5.68111e-05
						Camk1	1133.65	0.406477	3.04781e-05	0.000530159																				Ccnf	152.851	0.663704	3.23809e-06	5.794e-05
						BC064078	73.7606	0.668195	3.07974e-05	0.000534037																				Smtn	175.443	0.626586	3.24704e-06	5.80432e-05
						Ghdc	178.358	0.465958	3.08992e-05	0.000535057																				Itih3	883.893	0.430489	3.39628e-06	6.04154e-05
						Lpxn	56.2908	0.727674	3.11798e-05	0.000538941																				Pdlim2	335.811	0.485942	3.61266e-06	6.40653e-05
						Ripk1	218.127	0.505523	3.1806e-05	0.000548775																				Arl5c	46.1683	0.784859	3.61549e-06	6.40653e-05
						Tap1	138.458	0.630309	3.18427e-05	0.000548914																				Dera	79.1136	0.65651	3.71721e-06	6.56767e-05
						H2-DMb1	50.3486	0.747412	3.25767e-05	0.000561063																				Plekha4	46.6716	0.824452	3.75216e-06	6.62301e-05
						Pnpla2	521.395	0.347208	3.27991e-05	0.000564386																				Folr2	26.9193	0.876644	3.85345e-06	6.78869e-05
						Slc12a9	988.009	0.322501	3.33869e-05	0.000573472																				Ltbp1	217.952	0.473415	3.88047e-06	6.82313e-05
						Shisa5	1342.58	0.36222	3.3636e-05	0.000577232																				Mxra7	409.05	0.390208	3.99558e-06	7.01877e-05
						Tmem37	40.3966	0.752779	3.37161e-05	0.00057809																				Asf1b	37.8559	0.851257	4.03377e-06	7.07904e-05
						Gal3st1	280.662	0.506645	3.3859e-05	0.000580021																				Ube2l6	132.698	0.677093	4.12549e-06	7.22613e-05
						Dap	219.91	0.609577	3.66616e-05	0.000622631																				Pvrl2	192.163	0.523283	4.16115e-06	7.26769e-05
						Sqrdl	143.009	0.540253	3.66712e-05	0.000622631																				Ddx58	188.933	0.642216	4.28828e-06	7.47543e-05
						Galnt4	151.039	0.589687	3.6927e-05	0.000626419																				Trf	9631.15	0.720657	4.30436e-06	7.49631e-05
						Tmbim1	814.516	0.351908	3.71095e-05	0.000628959																				Ikbke	68.9629	0.646116	4.31789e-06	7.51271e-05
						Il17ra	275.656	0.475952	4.03077e-05	0.000678365																				Nop9	323.429	0.45778	4.46706e-06	7.75749e-05
						Erbb2ip	2170.9	0.505439	4.10227e-05	0.000687982																				Usp18	27.8122	0.885425	4.53836e-06	7.87381e-05
						Adssl1	349.695	0.578396	4.15259e-05	0.000695206																				Agtrap	351.32	0.489386	4.54415e-06	7.87565e-05
						Zc3h12a	30.1502	0.714407	4.19702e-05	0.000701418																				Csf2rb2	149.117	0.696928	4.54804e-06	7.87565e-05
						Ehd4	284.117	0.575372	4.21041e-05	0.000703043																				Rhog	721.531	0.596437	4.88615e-06	8.42918e-05
						Ehd2	237.983	0.570657	4.29834e-05	0.000716477																				Kif11	103.728	0.825346	4.89603e-06	8.43827e-05
						Mgmt	29.6799	0.71993	4.34577e-05	0.000723754																				Gbp5	51.1755	0.838455	5.01839e-06	8.63286e-05
						Pctp	55.8546	0.694881	4.37178e-05	0.000726627																				Ptn	3906.98	0.442268	5.0869e-06	8.74248e-05
						Plekhf1	102.935	0.634463	4.40456e-05	0.000730247																				Ube2t	23.8028	0.830343	5.13688e-06	8.8118e-05
						Cldn11	3448.02	0.663378	4.40761e-05	0.000730247																				Hn1l	191	0.748749	5.20073e-06	8.91044e-05
						AK199358	119.895	0.529473	4.48836e-05	0.000742341																				Mapkapk3	88.6597	0.603876	5.21703e-06	8.9158e-05
						Pllp	1280.63	0.519904	4.58335e-05	0.000756745																				Tagln	318.554	0.792598	5.40181e-06	9.22296e-05
						Hn1l	191	0.666966	4.72428e-05	0.000779344																				Tmem86a	466.096	0.526723	5.43663e-06	9.25646e-05
						Traf1	46.5245	0.698973	4.91744e-05	0.000808425																				4931406C07Rik	738.098	0.35183	5.58559e-06	9.48356e-05
						Matn4	356.842	0.352151	4.93031e-05	0.000809847																				Sh3glb1	2037.81	0.339438	5.64034e-06	9.56763e-05
						Cyp4f16	170.915	0.462417	4.95551e-05	0.000813289																				Nek2	56.1684	0.822237	5.65953e-06	9.59128e-05
						Ankrd13a	1154.89	0.369849	5.1052e-05	0.00083571																				Npepl1	410.305	0.365071	5.67014e-06	9.60035e-05
						S1pr2	93.8478	0.617077	5.14181e-05	0.000840985																				Soat1	595.739	0.503758	5.67577e-06	9.60098e-05
						Myc	118.381	0.545529	5.33527e-05	0.000870398																				Tspan14	938.246	0.335318	5.94792e-06	0.000100428
						Neat1	377.051	0.594998	5.39084e-05	0.000878716																				Prss23	467.638	0.508338	6.30506e-06	0.000106261
						Lrrc75a	182.938	0.455938	5.56181e-05	0.000902747																				Emid1	148.389	0.509983	6.327e-06	0.000106533
						Cenph	17.5803	0.722348	5.59604e-05	0.000906742																				Adgrg6	51.1434	0.783454	6.39673e-06	0.000107608
						Mcm10	36.7955	0.73884	5.60235e-05	0.000906742																				Smim3	353.5	0.575494	6.40964e-06	0.000107726
						Irf9	356.767	0.527941	5.60535e-05	0.000906742																				Cenpn	32.9145	0.822118	6.42496e-06	0.000107814
						Kcnk13	175.784	0.573774	5.64495e-05	0.000912378																				Vat1	824.63	0.363421	6.4267e-06	0.000107814
						Mob3a	315.931	0.342615	5.65233e-05	0.000912801																				Pmf1	89.6594	0.727009	6.5151e-06	0.000109097
						Capn2	2077.8	0.420542	5.67027e-05	0.000914927																				Mrps6	707.323	0.687135	6.57146e-06	0.000109839
						Ptn	3906.98	0.390384	5.67953e-05	0.000915651																				Tagap	37.4262	0.801718	6.67531e-06	0.000111473
						Myd88	187.477	0.469115	5.74289e-05	0.000924139																				E130114P18Rik	138.544	0.57958	6.85191e-06	0.000114109
						Ifitm10	580.583	0.371162	5.76633e-05	0.000925752																				Ifit2	213.915	0.688818	6.97301e-06	0.00011602
						Tspan12	450.785	0.39569	5.90274e-05	0.000943699																				Zeb2os	98.9362	0.617368	6.99854e-06	0.000116339
						Tmem229a	1578.53	0.381982	5.97966e-05	0.000953039																				Igsf11	892.868	0.459592	7.30522e-06	0.000121326
						Nln	702.016	0.371426	5.9948e-05	0.000954438																				Pm20d1	55.8309	0.65155	7.42938e-06	0.000123276
						Mob1a	246.037	0.458306	6.15758e-05	0.000977918																				Lmo2	358.053	0.353536	7.5139e-06	0.000124437
						Ftl1	4205.63	0.646976	6.20146e-05	0.000984071																				Gm10790	54.9755	0.706562	7.6591e-06	0.000126514
						Tnfrsf11b	22.6804	0.731954	6.2974e-05	0.000998469																				Casp7	67.97	0.728227	7.80084e-06	0.000128739
						Esyt1	231.175	0.634964	6.38933e-05	0.00101137																				Myo1e	429.493	0.547831	7.85618e-06	0.000129535
						Abcd2	865.681	0.377733	6.55526e-05	0.00103422																				Galnt10	414.68	0.381981	8.21149e-06	0.000135028
						Tnni2	7.89043	0.727243	6.59003e-05	0.001038																				Zfp488	124.854	0.652204	8.33055e-06	0.000136739
						Eif2ak2	231.458	0.647878	6.72e-05	0.00105673																				S1pr2	93.8478	0.67848	8.58454e-06	0.000140782
						Ncapd2	738.826	0.395962	6.77563e-05	0.001062																				Lgals3bp	941.12	0.813871	8.96578e-06	0.00014677
						Fut10	261.869	0.344559	6.91575e-05	0.00108219																				Gpr160	26.9676	0.809185	9.22651e-06	0.000150499
						Ube2t	23.8028	0.71043	6.96917e-05	0.00108966																				C1qtnf1	163.241	0.725811	9.42531e-06	0.000153468
						Decr1	489.484	0.498807	7.04485e-05	0.0010997																				Vcan	654.999	0.51446	9.60196e-06	0.000156205
						Rb1	1020.16	0.374048	7.11819e-05	0.0011079																				Tmem252	40.5639	0.807323	9.61113e-06	0.000156215
						Tacc3	201.382	0.626128	7.12052e-05	0.0011079																				Cercam	228.697	0.444275	9.70682e-06	0.00015763
						Mif4gd	362.61	0.341464	7.28731e-05	0.0011311																				V00821	31.0115	0.780087	9.85775e-06	0.000159514
						Cercam	228.697	0.399266	7.30255e-05	0.00113163																				Pfn1	2993.21	0.33926	1.00172e-05	0.000161951
						Lrg1	37.9602	0.697465	7.31071e-05	0.00113198																				Tmod3	556.561	0.322015	1.00466e-05	0.000162221
						2021-09-02	1564.74	0.394092	7.34103e-05	0.00113576																				Nedd1	88.3814	0.684291	1.01276e-05	0.000163302
						Cenpn	32.9145	0.706371	7.37121e-05	0.00113767																				Pola2	188.404	0.448216	1.02185e-05	0.000164622
						Ifitm2	263.024	0.581083	7.40655e-05	0.00114037																				Rfx4	430.662	0.384935	1.026e-05	0.000165145
						Rras	199.63	0.46567	7.4641e-05	0.00114647																				Adam17	482.425	0.444688	1.05266e-05	0.00016899
						Aldh16a1	182.626	0.409644	7.79824e-05	0.00119397																				Arhgap31	927.939	0.420953	1.06927e-05	0.000171348
						Mical1	366.012	0.405765	7.84368e-05	0.00119996																				1810058I24Rik	361.128	0.32999	1.07016e-05	0.000171348
						Fdxr	357.074	0.325909	7.85177e-05	0.00120024																				P2ry13	350.602	0.587661	1.07556e-05	0.000172061
						Tgfbr1	719.432	0.416121	7.95926e-05	0.00121474																				Parvg	398.967	0.476891	1.08514e-05	0.000173442
						Spsb1	570.984	0.473066	7.97645e-05	0.00121639																				Myc	118.381	0.593412	1.08823e-05	0.000173783
						Mcl1	1753.63	0.337642	7.99239e-05	0.00121785																				Cenph	17.5803	0.806925	1.09253e-05	0.000174318
						C330027C09Rik	81.2242	0.684473	8.08818e-05	0.00122757																				Apod	4967.93	0.743144	1.09385e-05	0.000174377
						Ppp1r14b	196.323	0.471696	8.11903e-05	0.00123128																				Sirt2	4166.04	0.322807	1.12789e-05	0.000179489
						Tmem100	358.395	0.439535	8.3517e-05	0.00126137																				Hip1	1544.4	0.364168	1.12997e-05	0.000179665
						Mpv17l2	371.103	0.341958	8.3678e-05	0.00126137																				Arhgap22	133.304	0.535206	1.14996e-05	0.000182525
						Lima1	395.512	0.421886	8.37006e-05	0.00126137																				Adamtsl4	221.745	0.653012	1.15563e-05	0.000183106
						2410006H16Rik	421.54	0.334637	8.38883e-05	0.0012632																				Traf1	46.5245	0.756111	1.19306e-05	0.000188221
						A930009A15Rik	21.4375	0.710556	8.5293e-05	0.00128234																				Col27a1	257.583	0.485418	1.20632e-05	0.000189985
						Gm10863	39.6917	0.683013	8.72415e-05	0.00130867																				Acad12	74.4279	0.662327	1.22846e-05	0.000193139
						Cfhr2	22.8873	0.718927	8.7249e-05	0.00130867																				Ezh2	143.309	0.640634	1.24884e-05	0.000196174
						Rnf135	121.182	0.489965	8.80666e-05	0.00131887																				Plekhf1	102.935	0.677688	1.30176e-05	0.000204311
						Trib1	275.892	0.540405	8.89796e-05	0.0013315																				Tmem104	629.437	0.342854	1.3043e-05	0.000204534
						Padi2	1271.55	0.549111	9.03126e-05	0.00135039																				Snx5	1976.86	0.412635	1.31439e-05	0.000205763
						Cryab	2183.45	0.359672	9.12686e-05	0.00136256																				Mrc1	87.5925	0.767321	1.35957e-05	0.000211928
						Dbp	1340.78	0.351542	9.22563e-05	0.00137516																				Sqrdl	143.009	0.568722	1.37185e-05	0.000213296
						Kcng4	256.383	0.449771	9.37027e-05	0.00139564																				Rnf180	431.642	0.385548	1.39107e-05	0.000215917
						Txndc12	585.18	0.329862	9.47189e-05	0.00140968																				Mob3a	315.931	0.368621	1.4231e-05	0.000220327
						Itgav	948.901	0.45683	9.52292e-05	0.00141617																				Trim34a	59.2858	0.798933	1.42537e-05	0.000220492
						H2-Eb1	56.6942	0.714667	9.67498e-05	0.00143656																				H2-T23	159.599	0.675313	1.44472e-05	0.000223107
						Ctso	901.107	0.341365	9.73137e-05	0.00144381																				Als2cl	312.571	0.462745	1.45388e-05	0.000224333
						Accs	111.29	0.479823	9.84292e-05	0.00145774																				Sh3pxd2b	588.464	0.425236	1.51702e-05	0.00023368
						Bcl2l11	146.6	0.516873	9.84806e-05	0.00145774																				Decr1	489.484	0.542142	1.55336e-05	0.000239077
						Carhsp1	988.507	0.397856	9.92435e-05	0.0014679																				Cdk2	96.8322	0.720953	1.55545e-05	0.000239196
						Tifa	145.684	0.484745	0.000100483	0.00148509																				Ugdh	639.948	0.443012	1.55758e-05	0.000239199
						Adamtsl5	108.4	0.536873	0.000101901	0.00150257																				Shc1	285.125	0.496293	1.56933e-05	0.000240722
						Aim2	55.9358	0.657685	0.000102977	0.00151727																				Hhex	43.6517	0.773828	1.58885e-05	0.000243308
						Aldh1a1	1520.87	0.493187	0.00010606	0.0015579																				Ubtd1	262.537	0.429409	1.60266e-05	0.000245218
						Aurka	63.0274	0.708727	0.000106219	0.00155905																				Nrm	58.0534	0.753627	1.61083e-05	0.000246262
						Ptges	98.8863	0.593308	0.000106446	0.00156118																				Kifc1	47.859	0.793502	1.62926e-05	0.000248871
						Sctr	37.1596	0.65955	0.000107247	0.00157173																				5730559C18Rik	146.611	0.59826	1.64113e-05	0.000250454
						I830012O16Rik	94.5057	0.640113	0.000111207	0.00162231																				P4hb	3155.73	0.349949	1.64236e-05	0.000250454
						Pgls	460.553	0.34853	0.000114194	0.00166084																				AK033756	68.7877	0.708762	1.6445e-05	0.000250571
						Lst1	46.7481	0.663581	0.000116705	0.00169351																				Triobp	263.174	0.525639	1.66566e-05	0.000253115
						Mastl	36.5513	0.701318	0.000117858	0.00170895																				Itgb3	94.2756	0.586286	1.66675e-05	0.000253115
						Cenpl	34.2018	0.663629	0.000122278	0.00176769																				Gng10	966.938	0.354991	1.69478e-05	0.000256945
						Rad51	38.4698	0.688671	0.000124261	0.00178837																				Cenpm	58.3002	0.685125	1.71285e-05	0.00025947
						Cstb	330.429	0.345	0.000128054	0.00184146																				Ncapd2	738.826	0.42671	1.74059e-05	0.000263235
						Cbr2	35.7242	0.676307	0.000134611	0.00192421																				Bmpr1b	594.246	0.32967	1.75083e-05	0.000264509
						Acot1	316.877	0.459184	0.000135427	0.00193442																				H2-DMb1	50.3486	0.773406	1.7519e-05	0.000264509
						Col27a1	257.583	0.423625	0.000137425	0.0019615																				Ugp2	2177.33	0.42786	1.7551e-05	0.000264772
						Irf7	75.5868	0.683168	0.000141345	0.00201146																				Vamp3	713.029	0.36314	1.77777e-05	0.000267749
						Cux1	1294.53	0.322751	0.000141736	0.00201553																				Accs	111.29	0.526771	1.83287e-05	0.000275141
						Rasgrp3	344.927	0.456804	0.000142806	0.00202925																				Shisa5	1342.58	0.373791	1.8598e-05	0.000278955
						E2f2	43.3392	0.686086	0.000146489	0.00207389																				Olig1	2777.28	0.422164	1.98254e-05	0.000296877
						P2ry13	350.602	0.506835	0.000147124	0.00207996																				St14	22.5107	0.786679	2.01385e-05	0.000301073
						Cpne3	424.779	0.389224	0.000149185	0.00210739																				Rnf135	121.182	0.531625	2.03501e-05	0.000303987
						6330416G13Rik	297.07	0.342386	0.000152442	0.00215023																				Rhbdf1	529.89	0.587183	2.04437e-05	0.000305135
						Clec2d	80.6638	0.506275	0.00015593	0.00219781																				Maf	434.89	0.394957	2.06672e-05	0.00030822
						Cdk2	96.8322	0.628306	0.000158315	0.00222579																				Ip6k3	20.6704	0.792433	2.12157e-05	0.000315885
						Mtus1	836.265	0.395992	0.000158496	0.00222579																				Tsc22d3	1123.36	0.44306	2.1538e-05	0.000320421
						Bcas1	4589.98	0.553051	0.000163939	0.0022955																				Cxcl10	19.2915	0.613535	2.1618e-05	0.00032135
						Mdfi	20.4644	0.707875	0.000165323	0.0023132																				Fmo5	119.944	0.489443	2.16654e-05	0.000321793
						Oasl2	134.061	0.664847	0.000167877	0.00234437																				Pstpip1	72.1354	0.683058	2.17688e-05	0.000323066
						Sema3d	201.764	0.553056	0.000174709	0.00243564																				9030617O03Rik	192.497	0.467615	2.19383e-05	0.000325318
						Asf1b	37.8559	0.663281	0.000177123	0.0024657																				Rps26	939.172	0.405302	2.23875e-05	0.000330904
						Calu	2653.79	0.34549	0.000183077	0.00253203																				Hacd2	894.368	0.344223	2.2451e-05	0.000331574
						Mfsd1	552.898	0.351602	0.000184029	0.00254338																				Plin3	555.395	0.477793	2.30566e-05	0.000339942
						Zeb2os	98.9362	0.514322	0.00018543	0.00256088																				Mir692-3	107.257	0.741342	2.30734e-05	0.000339942
						Grm3	1164.61	0.335184	0.00019527	0.00267366																				Pdlim5	897.987	0.337001	2.34941e-05	0.00034586
						Nradd	38.7474	0.637909	0.000201699	0.00275186																				Ctso	901.107	0.369102	2.47977e-05	0.000364171
						Itgb3	94.2756	0.506328	0.000205577	0.00279879																				Ifit1	63.6925	0.786119	2.5391e-05	0.000372286
						Fxyd5	328.228	0.540827	0.000207494	0.0028229																				Cmya5	227.912	0.451148	2.58754e-05	0.00037878
						Kifc1	47.859	0.666814	0.000207845	0.00282566																				H2-Q7	13.1255	0.730563	2.59423e-05	0.000379456
						F3	1042.28	0.349806	0.000208599	0.00283189																				Ripk1	218.127	0.510457	2.63349e-05	0.000384582
						Car8	162.27	0.63533	0.000208986	0.00283513																				Esyt1	231.175	0.665782	2.79548e-05	0.000406613
						Gm10790	54.9755	0.582108	0.000220019	0.00297429																				Hapln1	646.35	0.383343	2.92507e-05	0.000424786
						Npas3	363.524	0.382752	0.000222668	0.00300375																				Capn2	2077.8	0.436405	2.93574e-05	0.00042566
						Dna2	63.5818	0.608662	0.000223726	0.00301377																				Gem	54.104	0.677382	2.97754e-05	0.000431378
						Sspn	310.544	0.372495	0.000226625	0.00304854																				Siglece	24.6379	0.75597	2.99827e-05	0.000434036
						Suox	378.225	0.342796	0.000229321	0.00307617																				Sun2	863.539	0.357586	3.03682e-05	0.000438921
						Gng12	1743.99	0.327426	0.000229632	0.00307819																				Orai1	228.945	0.501026	3.07489e-05	0.000443722
						Mboat1	75.1061	0.608571	0.00023231	0.00310653																				Cd74	118.74	0.77111	3.15084e-05	0.000453606
						Ccnf	152.851	0.524122	0.000236564	0.00316007																				Ucp2	1034.33	0.702886	3.16821e-05	0.000455749
						Stil	22.1109	0.629773	0.000244563	0.00325331																				Efemp1	275.531	0.589512	3.18616e-05	0.000457787
						Nme6	118.707	0.430918	0.000246534	0.00327045																				Bak1	360.941	0.417705	3.18982e-05	0.000457787
						Acad12	74.4279	0.554825	0.000248326	0.00328741																				Slc25a10	510.746	0.380232	3.1899e-05	0.000457787
						Ppp1r14a	207.824	0.607513	0.00025278	0.00334176																				Tgm2	454.959	0.630011	3.20001e-05	0.000458692
						Hmga2-ps1	34.6076	0.643439	0.000253781	0.00335268																				Mcm2	196.88	0.692192	3.25295e-05	0.000465374
						Itih5	846.426	0.371851	0.000254103	0.00335461																				Mastl	36.5513	0.764417	3.26202e-05	0.000466306
						Taf13	385.535	0.392384	0.000254902	0.00336053																				Mcl1	1753.63	0.355329	3.28855e-05	0.000469731
						H2-M3	41.3989	0.628858	0.000261829	0.00344238																				Spsb1	570.984	0.497463	3.32985e-05	0.000475258
						Mvp	277.326	0.492195	0.000271928	0.00356294																				Rhbdf2	43.7445	0.749107	3.41559e-05	0.000487114
						Crybb1	84.3575	0.568019	0.000273049	0.00357031																				Dbf4	45.7815	0.735417	3.42469e-05	0.000487685
						4930427A07Rik	57.6435	0.668108	0.000275279	0.00359702																				Tm4sf1	313.478	0.607259	3.4276e-05	0.000487685
						Slc2a4	31.6984	0.674838	0.000275477	0.00359716																				Tmco4	122.648	0.589649	3.60669e-05	0.000511971
						Efemp1	275.531	0.515383	0.000275766	0.00359847																				Tyms	72.9238	0.706883	3.63527e-05	0.000515146
						Cacng5	353.139	0.580814	0.000280118	0.00364781																				Rbl1	64.2942	0.75615	3.68928e-05	0.000521264
						Lama2	443.869	0.330277	0.000293985	0.00381028																				Cstb	330.429	0.370574	3.78225e-05	0.000533987
						AK049914	50.4316	0.669069	0.000296047	0.00383182																				Tgfbr1	719.432	0.434338	3.79203e-05	0.000534955
						Itgb1	1484.3	0.394058	0.000301099	0.00387888																				Cux1	1294.53	0.349191	3.80707e-05	0.000536662
						Stc2	77.8937	0.579176	0.000302637	0.00389373																				Tpm4	665.824	0.54785	3.81034e-05	0.000536709
						Gm5086	26.703	0.643717	0.000305763	0.00393067																				Incenp	357.853	0.487739	3.91155e-05	0.00054927
						Plekhg2	207.185	0.597025	0.000309429	0.00397018																				Fam46c	61.1375	0.781114	3.92426e-05	0.000550633
						Chtf18	50.0437	0.630677	0.000311498	0.00399138																				Abtb2	379.648	0.416499	3.94789e-05	0.000553522
						Haus4	82.6861	0.545459	0.00031578	0.00404085																				Mpv17l2	371.103	0.356754	3.99064e-05	0.000559087
						Col9a2	137.331	0.546388	0.000326445	0.00416342																				Gpr183	43.2636	0.742784	3.99414e-05	0.000559149
						5730559C18Rik	146.611	0.499039	0.00032905	0.00419107																				Plgrkt	279.553	0.381094	4.08609e-05	0.000571146
						Arl5c	46.1683	0.603831	0.00032952	0.00419427																				Acot1	316.877	0.49323	4.11097e-05	0.000574184
						Cib1	331.854	0.336937	0.0003303	0.00420141																				Scgb3a1	12.0477	0.674812	4.13308e-05	0.00057639
						Ndp	267.214	0.384505	0.000334969	0.0042467																				Ndp	267.214	0.4385	4.17297e-05	0.000581067
						Pla2g4a	97.495	0.586193	0.0003433	0.00433513																				Amz1	331.159	0.482621	4.20126e-05	0.000584561
						Bak1	360.941	0.360107	0.000344287	0.00434472																				Gatsl3	82.9334	0.58595	4.21812e-05	0.00058646
						H2-Aa	61.1627	0.646317	0.000355204	0.00446833																				Sp100	64.6147	0.769701	4.23721e-05	0.000588665
						Rcn3	261.758	0.382569	0.000355247	0.00446833																				Il2rg	30.0482	0.78261	4.42538e-05	0.000612944
						AK139445	27.5621	0.650837	0.000360741	0.0045226																				Rad51	38.4698	0.73976	4.53197e-05	0.000626283
						Siglece	24.6379	0.637672	0.000366227	0.00458537																				Fli1	80.919	0.66485	4.55957e-05	0.000629145
						Fos	218.101	0.523767	0.000389949	0.00486017																				Pla2g4a	97.495	0.667678	4.72989e-05	0.000650681
						Cxcl10	19.2915	0.445094	0.000395451	0.00491804																				Creg1	652.561	0.378224	4.75778e-05	0.000653534
						Trim12c	97.9205	0.524141	0.000395878	0.00491804																				Mcm10	36.7955	0.746353	4.79156e-05	0.000657587
						Tyms	72.9238	0.603361	0.000396132	0.00491804																				Crybb1	84.3575	0.634904	4.82441e-05	0.000661193
						Cdkn1a	191.403	0.526312	0.000397045	0.00492619																				Nedd9	380.352	0.452503	4.91564e-05	0.000672185
						Ctla2a	137.252	0.618949	0.000399936	0.00495564																				Gareml	515.872	0.438822	4.96452e-05	0.000677854
						Gli3	300.488	0.420782	0.000401163	0.00496763																				Prrx2	22.666	0.733563	5.11451e-05	0.000696083
						Gli2	170.156	0.374791	0.00040734	0.00504087																				Cdk5rap2	524.267	0.393314	5.11708e-05	0.000696083
						Mxd3	32.5514	0.638404	0.000415354	0.0051268																				Plscr4	148.193	0.494467	5.16354e-05	0.000700317
						Elf1	155.551	0.472422	0.000428527	0.00526566																				Mvp	277.326	0.546927	5.1891e-05	0.000703262
						Cp	418.92	0.464555	0.00044005	0.00539687																				Lhfpl3	567.919	0.492146	5.33239e-05	0.000721076
						Gmnn	55.1823	0.61252	0.000443826	0.00543623																				Gpr157	74.2928	0.655588	5.5893e-05	0.00075303
						Arid5a	320.373	0.366309	0.000446166	0.00545696																				Hist1h2bc	643.059	0.35593	5.82171e-05	0.000783188
						Tec	50.6037	0.576009	0.000446372	0.00545696																				Tes	38.8001	0.713259	5.82728e-05	0.000783359
						Hacl1	166.686	0.388898	0.000449913	0.00548326																				Mdk	347.111	0.509264	5.83597e-05	0.000783951
						Phlda3	322.63	0.420968	0.000457788	0.00555598																				Ska3	30.7634	0.738483	5.85069e-05	0.000785351
						Bgn	521.914	0.472289	0.000458777	0.00556249																				Lst1	46.7481	0.693205	5.86166e-05	0.000786245
						Ezh2	143.309	0.512816	0.000467277	0.00565125																				Maff	18.726	0.756759	6.0712e-05	0.000811967
						Gjb1	313.331	0.542426	0.000471473	0.00569481																				1110007C09Rik	152.436	0.408183	6.15622e-05	0.000822736
						Plxnd1	1011.57	0.36011	0.000472842	0.00570456																				Rfc4	58.5442	0.653891	6.3076e-05	0.000840507
						Cmya5	227.912	0.375525	0.0004795	0.00577357																				Arap3	243.145	0.428892	6.31996e-05	0.00084154
						Phf19	48.1132	0.627528	0.000481218	0.00579062																				Stil	22.1109	0.702783	6.39933e-05	0.000850869
						Pvrl2	192.163	0.398179	0.000483849	0.00581498																				Galnt4	151.039	0.570733	6.46298e-05	0.000858083
						AK202301	503.368	0.425255	0.000487241	0.00584842																				Trim12a	67.5244	0.597869	6.55737e-05	0.00086872
						Isoc2b	112.081	0.417667	0.000488804	0.0058635																				Gnpda1	423.137	0.339999	6.61776e-05	0.000875452
						Dhx58	54.7401	0.62633	0.000501065	0.00599813																				Piezo2	51.8904	0.689024	6.75518e-05	0.000892609
						Gbp5	51.1755	0.625479	0.000506647	0.00605481																				AI467606	39.3724	0.676903	6.80509e-05	0.000897637
						Rell1	244.366	0.344513	0.000507991	0.00606567																				Aurka	63.0274	0.729764	6.80992e-05	0.000897637
						Slc46a3	174.399	0.370659	0.000512287	0.00610318																				Dhrs4	303.03	0.369336	6.81465e-05	0.000897637
						Acsf2	328.339	0.413625	0.000515209	0.00612278																				C330027C09Rik	81.2242	0.691498	6.83704e-05	0.00089908
						Ang	55.7781	0.602843	0.00051681	0.0061342																				Cp	418.92	0.526192	6.83957e-05	0.00089908
						Clec5a	70.6063	0.598623	0.000527005	0.00624361																				Erbb2	98.7023	0.577028	6.86475e-05	0.00089908
						H2-T23	159.599	0.538225	0.000534273	0.006318																				F13a1	61.0556	0.74103	6.86527e-05	0.00089908
						Dynlt1f	36.4217	0.592117	0.000541035	0.00638221																				Ost4	517.177	0.326755	6.9072e-05	0.000902976
						Myl9	409.248	0.48694	0.000565816	0.00665407																				Itih5	846.426	0.404306	6.90985e-05	0.000902976
						Tmem179b	130.021	0.380688	0.000569373	0.00668769																				Dbndd2	3238.53	0.396625	6.97128e-05	0.000910353
						Vasp	373.87	0.326253	0.000573636	0.00672952																				Greb1	19.749	0.733151	7.05742e-05	0.000920286
						Srpk3	120.695	0.419519	0.00057456	0.00673211																				Nkiras2	268.58	0.331376	7.08726e-05	0.000923518
						Agtrap	351.32	0.368311	0.000577737	0.0067652																				Ldlrap1	107.84	0.603253	7.14014e-05	0.000929082
						Marcks	2007.45	0.370712	0.000582844	0.00682084																				Fbln5	128.306	0.69335	7.21657e-05	0.00093636
						Sox10	1117.9	0.366284	0.000588915	0.00687929																				Isoc2b	112.081	0.473793	7.34606e-05	0.00095181
						Lrmp	68.746	0.614319	0.0006015	0.00701348																				Gdpd2	332.026	0.487087	7.42136e-05	0.000960204
						Rbl1	64.2942	0.620276	0.00060523	0.0070484																				Nras	1165.59	0.325839	7.57474e-05	0.000978663
						Ifit2	213.915	0.522975	0.000621695	0.00721384																				Hopx	1540.48	0.32346	7.78322e-05	0.00100276
						AK045786	41.189	0.594835	0.00062551	0.00725372																				Tnc	419.87	0.627115	7.86726e-05	0.00101288
						H2-Oa	17.2472	0.630211	0.000626396	0.00725644																				Litaf	470.811	0.453172	7.98886e-05	0.00102708
						Fli1	80.919	0.556296	0.000627723	0.00726619																				Tnfsf12	113.601	0.490031	8.1104e-05	0.00103978
						C1qtnf6	89.7646	0.489022	0.000630064	0.0072889																				Fam105a	533.555	0.328824	8.34246e-05	0.00106339
						Snx8	284.122	0.355436	0.000636793	0.00735785																				Ednrb	1452.47	0.486805	8.34408e-05	0.00106339
						Glipr1	48.5523	0.605678	0.000650022	0.00749715																				Reep4	81.647	0.604721	8.3469e-05	0.00106339
						Ly6g6e	77.1494	0.601934	0.000662204	0.00762204																				B4galt1	266.173	0.533316	8.35583e-05	0.00106378
						Ezr	2532.93	0.366438	0.000670396	0.0076951																				Col5a3	181.649	0.571257	8.37077e-05	0.00106494
						Ptprz1	7599.18	0.336612	0.000671448	0.00770257																				Mtus1	836.265	0.411173	8.73215e-05	0.00110783
						Tmem140	45.039	0.577053	0.000682031	0.00781929																				Igtp	102.274	0.633936	8.74788e-05	0.00110906
						Rrm1	522.369	0.507122	0.000682439	0.00781929																				Fam83d	53.7752	0.721591	8.80882e-05	0.00111523
						AK040557	25.1859	0.613202	0.000701031	0.00798934																				Gpx7	94.3929	0.561493	9.1981e-05	0.0011577
						Igtp	102.274	0.546621	0.000703338	0.00800814																				Nfkbia	458.161	0.471311	9.20126e-05	0.0011577
						Tgfbi	183.696	0.603309	0.000703517	0.00800814																				Slc7a5	1234.59	0.334286	9.30449e-05	0.00116827
						Emilin2	105.827	0.486616	0.000704933	0.0080195																				Notch1	1058.64	0.415353	9.3521e-05	0.00117264
						Ucp2	1034.33	0.568212	0.000725253	0.00820684																				Smoc1	408.365	0.439602	9.3711e-05	0.00117422
						Spc24	39.4996	0.62141	0.000729816	0.00825359																				Tmem140	45.039	0.665561	9.63933e-05	0.00120587
						Mfng	102.321	0.488461	0.000733038	0.00827539																				Pdk4	254.782	0.409352	9.74967e-05	0.00121831
						Ugt8a	1157.98	0.478188	0.000733776	0.00827884																				Ehd2	237.983	0.543117	9.82527e-05	0.00122692
						Acy3	43.4028	0.548883	0.000744113	0.00837575																				Ifi35	67.5917	0.587743	9.86621e-05	0.00123119
						Rgcc	244.664	0.365895	0.000754527	0.0084717																				Smc4	264.667	0.636446	9.93883e-05	0.0012394
						Cntf	15.5357	0.619039	0.000762646	0.00853662																				Tbx6	29.017	0.674163	9.98375e-05	0.00124416
						Cyp39a1	46.7677	0.599825	0.000767918	0.00858322																				Gmnn	55.1823	0.681407	0.000100347	0.00124965
						Tpm4	665.824	0.446176	0.000791753	0.00879833																				Ifitm1	63.952	0.68337	0.000104362	0.00129788
						Ermard	302.713	0.556548	0.000815818	0.00902911																				Tacc3	201.382	0.611055	0.000105105	0.00130623
						Nedd1	88.3814	0.516852	0.000837779	0.00924547																				Pax6	240.564	0.33822	0.000107065	0.00132581
						Tgif1	47.6291	0.603293	0.000848208	0.0093498																				Ifih1	87.4017	0.665862	0.000107116	0.00132581
						Smc4	264.667	0.543814	0.000850972	0.00936412																				Plscr2	68.7309	0.709258	0.000110796	0.00136581
						Fgd3	211.167	0.375538	0.000858533	0.00943107																				Pctp	55.8546	0.656034	0.000111219	0.0013701
						Hbegf	303.678	0.493718	0.000883105	0.00962379																				Ly6a	361.947	0.549166	0.000112278	0.00138222
						Tdgf1	19.0285	0.619293	0.000908103	0.00985698																				Mxd3	32.5514	0.703077	0.000114269	0.00140389
						Nrm	58.0534	0.572286	0.000934501	0.0101206																				Fcgrt	494.285	0.43003	0.000119786	0.00146286
						Trip13	28.4835	0.603176	0.000945771	0.0102196																				Cd109	246.755	0.577517	0.000119946	0.00146379
						Tor4a	134.642	0.568388	0.000954235	0.0102687																				Cenpj	78.9543	0.509163	0.000122018	0.0014861
						Chadl	252.351	0.358682	0.000954758	0.0102687																				Rgl3	108.976	0.463871	0.000122909	0.00149396
						Erbb2	98.7023	0.479214	0.000955676	0.0102687																				Pcna	507.601	0.39299	0.000129072	0.00156471
						Mroh3_	9.31929	0.554554	0.000964934	0.0103508																				Ly6c1	565.558	0.400032	0.000130839	0.00158193
						Trim25	188.044	0.485929	0.000969319	0.010392																				Crip1	88.0894	0.51954	0.000134426	0.00162101
						Irak3	20.4417	0.616198	0.000970002	0.0103935																				Arhgef19	578.144	0.329193	0.000134696	0.00162319
						Xaf1	121.817	0.479931	0.000977927	0.010455																				Mx2	25.5186	0.710867	0.000135769	0.00163397
						Hmox1	625.517	0.354017	0.000980455	0.0104762																				Phf19	48.1132	0.694621	0.000137831	0.00165443
						Ska3	30.7634	0.592187	0.000994121	0.0105998																				Tspan12	450.785	0.375408	0.000138593	0.00166248
						Slc45a3	31.5548	0.596341	0.00100108	0.0106551																				A930009A15Rik	21.4375	0.684852	0.000139689	0.00167343
						Cracr2b	45.628	0.548756	0.00100922	0.0107238																				Mcm4	309.864	0.494788	0.000139784	0.00167346
						Mir692-3	107.257	0.568316	0.00104722	0.0110846																				Slc4a4	4709.81	0.330921	0.000146401	0.00174241
						Ube2l6	132.698	0.480497	0.00107679	0.0113661																				Susd5	133.021	0.507744	0.000149619	0.00177608
						Plxnb3	925.605	0.415624	0.00108434	0.0114207																				Adrb2	32.8594	0.638319	0.000152851	0.00181209
						Cd74	118.74	0.575234	0.00108836	0.0114568																				Lrig1	1102.91	0.462067	0.000153429	0.00181777
						Ifnar2	477.676	0.333353	0.00109969	0.0115444																				Cav2	649.12	0.525736	0.000154933	0.00183321
						Mcm5	197.228	0.552379	0.00114238	0.0119272																				Abcd2	865.681	0.357541	0.00015777	0.00186075
						Gm973	249.351	0.406896	0.00114656	0.0119643																				Cmtm5	1052.97	0.348486	0.000165289	0.00194431
						Lhfp	399.673	0.32396	0.00115061	0.0119811																				Eva1b	43.1403	0.652454	0.000167404	0.00196675
						Hfe	203.583	0.507973	0.00115192	0.0119811																				Elf1	155.551	0.50392	0.000170343	0.00199487
						Rad51ap1	56.0059	0.56176	0.00118101	0.0122438																				Slc16a3	72.0936	0.690974	0.000176881	0.00205955
						Grifin	4.24028	0.500519	0.0012363	0.0127687																				Ghdc	178.358	0.419699	0.000177093	0.00206071
						A930003O13Rik	7.12055	0.597962	0.00124272	0.0128211																				Glmp	935.692	0.343406	0.000177224	0.00206092
						Fadd	83.9707	0.44395	0.00125894	0.0129675																				Cracr2b	45.628	0.626641	0.0001803	0.00209403
						Tes	38.8001	0.566641	0.00127974	0.0131447																				Zfp36l1	610.673	0.428214	0.000180832	0.00209781
						AK033756	68.7877	0.526193	0.00130388	0.0133444																				Chst7	61.8156	0.550283	0.000180971	0.00209781
						Adgre5	292.972	0.324564	0.00130954	0.013388																				Fos	218.101	0.552865	0.000181449	0.00210202
						Tmem252	40.5639	0.545624	0.00131904	0.0134708																				Gins2	64.7378	0.644473	0.000186618	0.00215099
						Stat6	240.462	0.433232	0.00133398	0.0135944																				1500012F01Rik	424.745	0.371675	0.000188095	0.00216529
						Fgl2	71.3792	0.509033	0.0013408	0.0136494																				Chtf18	50.0437	0.653735	0.00018923	0.00217424
						Acat3	237.233	0.383388	0.00137048	0.0138999																				Myo1h	86.474	0.487498	0.000198356	0.00226042
						Sdsl	105.268	0.40317	0.00138342	0.0139941																				Lace1	547.726	0.32511	0.000204753	0.00231863
						Emilin1	93.1255	0.548437	0.0014023	0.0141477																				Sspn	310.544	0.374913	0.000204916	0.00231863
						Angpt1	221.22	0.483372	0.00140454	0.0141629																				Plxnb2	2944.37	0.372126	0.00020497	0.00231863
						Hist1h1c	250.202	0.42372	0.00140836	0.0141939																				Poc1b	176.715	0.421645	0.000216019	0.00242982
						Lgals3bp	941.12	0.574883	0.00142009	0.0142896																				Asah1	1200.78	0.333281	0.000216129	0.00242982
						Mcm2	196.88	0.526995	0.00145699	0.0146379																				Micall2	89.4582	0.552619	0.000219349	0.0024613
						Shc1	285.125	0.366102	0.00148465	0.0148469																				Glipr1	48.5523	0.659534	0.000219468	0.0024613
						Tmco4	122.648	0.453548	0.001493	0.0148982																				Car8	162.27	0.632117	0.000224087	0.00250542
						Myo1h	86.474	0.417066	0.00149444	0.0149047																				Vstm4	104.097	0.53738	0.000227357	0.00253732
						Mxra8	241.147	0.425263	0.00151031	0.0150473																				Lmnb1	196.256	0.505898	0.000234054	0.00260251
						Ttf2	87.6757	0.528865	0.00151332	0.0150688																				Itgav	948.901	0.43053	0.000234829	0.00260796
						Pcdhb5	124.547	0.357932	0.00151403	0.0150688																				Itgb1	1484.3	0.400408	0.000239735	0.00265599
						Tap2	263.716	0.329531	0.00152149	0.0151116																				H2-M3	41.3989	0.632554	0.000240739	0.00266549
						Ikbke	68.9629	0.44716	0.00153295	0.0151977																				C1ra	82.4716	0.617064	0.000244606	0.00270371
						Prdx4	241.299	0.406741	0.00158767	0.0156634																				4930427A07Rik	57.6435	0.673793	0.000245279	0.00270755
						Ifit3	179.488	0.555627	0.00159416	0.0157032																				Pgls	460.553	0.329922	0.000260439	0.00285935
						Cldn19	30.4729	0.573767	0.00160801	0.0158072																				Lrmp	68.746	0.657187	0.000260673	0.0028602
						Mtbp	62.308	0.527332	0.00162992	0.0159979																				Bmp1	2554.64	0.338099	0.000261361	0.0028657
						Slc9a9	478.314	0.351948	0.00173876	0.0169104																				Ppic	57.3678	0.631092	0.000261533	0.0028657
						9030617O03Rik	192.497	0.344831	0.00183304	0.0176717																				Dctpp1	170.555	0.430424	0.000261645	0.0028657
						Eva1b	43.1403	0.536931	0.00183897	0.0177052																				Hbegf	303.678	0.541498	0.000266755	0.00291642
						Il33	918.796	0.439323	0.00184505	0.0177549																				Mical1	366.012	0.373688	0.000277117	0.00301888
						Fam46c	61.1375	0.572956	0.00184741	0.0177598																				AK045786	41.189	0.633419	0.000279272	0.00303245
						Gm5089	108.287	0.408692	0.00190524	0.0182062																				H2-T24	37.9923	0.686298	0.000282296	0.00306251
						Gpr157	74.2928	0.502893	0.00192121	0.0183496																				AK040557	25.1859	0.660228	0.00028678	0.00310378
						AK043219	10.726	0.563607	0.00198512	0.0188193																				Muc1	34.6855	0.600958	0.000292008	0.0031529
						Dsn1	98.7316	0.512933	0.00207352	0.0195438																				Samhd1	478.084	0.343157	0.000292892	0.00315871
						Rgs6	161.712	0.364874	0.00207377	0.0195438																				Cacna2d4	62.7437	0.555589	0.000302366	0.00325512
						Cks2	12.824	0.576687	0.00207595	0.0195485																				Pglyrp1	65.9517	0.601915	0.000304152	0.00326856
						Nsl1	30.0601	0.555011	0.00213051	0.0199218																				Acer2	111.754	0.597588	0.000308455	0.00331285
						Lmnb1	196.256	0.422356	0.00213943	0.0199858																				Slc7a2	857.922	0.357806	0.000317338	0.00339837
						AK043332	37.7763	0.531827	0.00215292	0.0200922																				Parp10	67.339	0.604126	0.000318119	0.00340463
						Polh	128.183	0.371386	0.00216767	0.0202157																				Ptges	98.8863	0.55059	0.000318623	0.00340803
						Zfp36l2	375.479	0.360916	0.00216827	0.0202157																				Suox	378.225	0.334098	0.000328912	0.00350782
						Sap30	127.741	0.368826	0.00219094	0.0203876																				Slfn5	126.023	0.645964	0.000331863	0.00353723
						Tph2	40.0261	0.533658	0.00220949	0.0205401																				Mavs	281.862	0.388953	0.000332503	0.00354198
						Met	156.459	0.390995	0.00225806	0.0209105																				Mfng	102.321	0.518087	0.000338796	0.00360136
						Plekhg1	655.728	0.408402	0.0022943	0.0211847																				Slc2a10	57.3028	0.569008	0.000338866	0.00360136
						Fignl1	35.0615	0.547585	0.00234446	0.0215855																				Mfsd1	552.898	0.336751	0.000340746	0.00361714
						Smoc1	408.365	0.341972	0.0024098	0.0221128																				Ahnak2_	43.1536	0.649056	0.000341813	0.00362635
						Gpr137b	328.997	0.33486	0.00241611	0.0221494																				Nmi	94.1823	0.521939	0.000343028	0.00363713
						Ecel1	134.679	0.572755	0.00244713	0.0223687																				Klf15	522.006	0.33078	0.000344085	0.00364411
						Fam167b	20.3609	0.526908	0.00245786	0.0224356																				Dsn1	98.7316	0.59765	0.000346616	0.00366666
						Fam83d	53.7752	0.54369	0.00248988	0.0226739																				Nsa2	397.608	0.323043	0.000349996	0.003696
						Slc16a3	72.0936	0.549016	0.00249146	0.0226774																				Tnni1	68.0843	0.551368	0.000365204	0.00383223
						Shc4	184.372	0.410662	0.00249287	0.0226796																				Cpne3	424.779	0.365763	0.000365825	0.00383654
						9330188P03Rik	27.5467	0.550966	0.00249753	0.0227071																				2021-09-02	1564.74	0.353769	0.000372052	0.00389291
						Gpr183	43.2636	0.537349	0.00250259	0.0227356																				Elovl1	484.478	0.365467	0.000372331	0.0038936
						Pou2f2	151.447	0.340843	0.00253316	0.0229916																				Il10rb	241.029	0.493471	0.000379667	0.00396124
						Grap	105.027	0.403195	0.00253842	0.0230284																				Hmcn2	14.6819	0.676921	0.000382635	0.00397858
						Pamr1	370.929	0.359991	0.00254233	0.023042																				Map3k8	42.5774	0.610875	0.000396598	0.00411499
						Il10rb	241.029	0.419016	0.00255424	0.0231281																				AK082264	36.1971	0.596699	0.000396764	0.00411499
						Ap5b1	125.638	0.342472	0.00256472	0.0231918																				Mamdc2	57.4077	0.556521	0.000399328	0.00413567
						Casp7	67.97	0.485601	0.00272064	0.0244271																				Gins1	22.394	0.65449	0.000402794	0.00416684
						Ppapdc1a	138.081	0.411871	0.0027446	0.0246077																				Pxmp2	114.121	0.464697	0.000403388	0.00417062
						Mfsd7a	27.7471	0.524486	0.00283469	0.0253207																				Dusp27	15.263	0.665759	0.000406386	0.00419925
						Cenpm	58.3002	0.472509	0.00292579	0.0260011																				Ephx2	510.615	0.378397	0.000408237	0.0042136
						AI467606	39.3724	0.502123	0.00293773	0.026071																				Fam167b	20.3609	0.634573	0.000415063	0.00426958
						Sox9	733.114	0.327048	0.00300367	0.0266069																				Ccdc3	534.499	0.517623	0.000423751	0.00433698
						Casp1	54.674	0.532256	0.00302327	0.0267558																				Nes	447.41	0.660318	0.000430188	0.00438811
						Stard8	320.009	0.371466	0.00302511	0.0267598																				Cmbl	194.341	0.390818	0.000433219	0.00441085
						Cks1b	52.4124	0.527146	0.0032206	0.0281898																				Rad51ap1	56.0059	0.61136	0.000434182	0.00441598
						Plekhf2	179.734	0.414087	0.00322694	0.0281934																				Mcm5	197.228	0.597799	0.000442856	0.00449974
						Cdh19	169.409	0.472986	0.00327887	0.0285434																				AK139445	27.5621	0.63917	0.000445849	0.00452318
						Mx2	25.5186	0.532903	0.00331094	0.0287443																				AK202301	503.368	0.427823	0.000448771	0.0045472
						Tmem243	94.1954	0.368319	0.00332	0.0288099																				H2-Oa	17.2472	0.648608	0.000451948	0.0045765
						Bub1b	120.642	0.529603	0.00332329	0.0288254																				Npas3	363.524	0.36348	0.000455271	0.0045963
						AB347559	4.90504	0.49607	0.00332805	0.0288436																				Hmgcs2	216.404	0.467527	0.000464755	0.00467545
						Gins1	22.394	0.530359	0.00337754	0.0292035																				Crispld2	65.4973	0.570582	0.000483495	0.00484796
						Parp12	287.102	0.353479	0.00342285	0.0295419																				Aldh16a1	182.626	0.361602	0.000497478	0.00497996
						Ccnd1	2002.07	0.340553	0.0034489	0.0296961																				Gli3	300.488	0.412223	0.000524219	0.00520304
						AK047082	51.6742	0.471748	0.00345377	0.0297151																				Nsmce1	281.216	0.369697	0.00052432	0.00520304
						Ebi3	28.3869	0.527572	0.00348756	0.0299655																				Ezr	2532.93	0.373381	0.000528037	0.00523424
						Micall2	89.4582	0.436736	0.00350171	0.0300467																				Hfe	203.583	0.540799	0.000539961	0.00533507
						Cntd1	14.4677	0.542592	0.00354357	0.0303244																				Fignl1	35.0615	0.635332	0.000546777	0.0053992
						Prr5l	263.05	0.404369	0.00355255	0.0303722																				Tnfrsf11b	22.6804	0.613075	0.000547043	0.0053992
						Mapkapk3	88.6597	0.388471	0.00355843	0.0303782																				Cdc45	65.7922	0.607259	0.00056422	0.00555074
						Tesk2	156.244	0.374179	0.00360209	0.0306682																				Gpr137b	328.997	0.379281	0.000581664	0.00570087
						Tnc	419.87	0.460395	0.00360294	0.0306682																				Rrm1	522.369	0.51329	0.000586231	0.00574255
						Tppp3	748.994	0.40037	0.00361412	0.030749																				Ifnar2	477.676	0.350536	0.000594492	0.00581412
						AK161964	669.272	0.401845	0.00368932	0.0312923																				Oplah	981.475	0.328176	0.000596381	0.00582947
						Gins2	64.7378	0.496862	0.00369848	0.0313423																				Tead3	102.296	0.462165	0.000610749	0.00594447
						Scpep1	371.917	0.392326	0.00375397	0.0317703																				Mob1a	246.037	0.392153	0.000614062	0.00597036
						Pold1	220.404	0.368319	0.00377887	0.0319388																				Ednra	163.646	0.379024	0.000615814	0.00598102
						Map3k14	139.817	0.390693	0.00390807	0.0329581																				Stard8	320.009	0.428092	0.000627525	0.00606896
						Fam212a	107.442	0.373251	0.00391095	0.0329679																				Nsl1	30.0601	0.620811	0.000643293	0.00618869
						Nfkbia	458.161	0.347355	0.00397635	0.0333725																				Ptprz1	7599.18	0.337317	0.000653936	0.00628446
						Casp12	19.86	0.530469	0.00400549	0.0335729																				Gm3219	82.8218	0.470081	0.000662316	0.00635831
						Prrx1	184.897	0.365239	0.0040943	0.0341485																				Ccdc23	191.643	0.361644	0.000665831	0.00638869
						Sh3d21	30.5488	0.507629	0.00416924	0.0346109																				AK047082	51.6742	0.548729	0.000678973	0.00649093
						Zfp36l1	610.673	0.327645	0.00420269	0.0348148																				Tfeb	238.19	0.421996	0.000684152	0.00653019
						Clic4	1853.1	0.328833	0.00429228	0.0354497																				Camk1	1133.65	0.330401	0.000703805	0.00668981
						Epx	13.9102	0.525149	0.00453505	0.037103																				C1ql1	254.92	0.398303	0.000720558	0.00681645
						Sspo	122.968	0.423063	0.0048707	0.0392296																				Slc46a1	314.112	0.330747	0.000723763	0.00683576
						Rom1	148.536	0.357239	0.00488878	0.0393421																				Ttf2	87.6757	0.562979	0.000739212	0.00694327
						Gm5617	53.6443	0.44069	0.00489508	0.0393651																				Lamp2	2027.94	0.355016	0.00074041	0.00694634
						Tgm2	454.959	0.424523	0.00492425	0.039528																				Emilin1	93.1255	0.57996	0.000742926	0.00696027
						Stat1	728.99	0.333998	0.00510576	0.0406784																				Chaf1a	190.597	0.379782	0.000748309	0.00699634
						Alox5	33.0951	0.495101	0.00523736	0.0414809																				Oas1b	10.2483	0.636938	0.000776938	0.00723439
						Mcm4	309.864	0.362389	0.00531026	0.0418554																				Dynlt1f	36.4217	0.574562	0.000778706	0.00724717
						Tagln	318.554	0.41195	0.00531299	0.0418597																				E2f2	43.3392	0.600913	0.000787285	0.00730762
						Pter	49.8181	0.430298	0.00532172	0.0419113																				Nme6	118.707	0.394774	0.000791963	0.0073369
						Ifitm1	63.952	0.483863	0.0054899	0.0430236																				Sh3d21	30.5488	0.59877	0.000798635	0.00739122
						Ifit1	63.6925	0.487911	0.00550494	0.0431063																				Ddit4	1215.4	0.356405	0.000809532	0.00746559
						Rgl3	108.976	0.336788	0.00554966	0.0433442																				Clec2d	80.6638	0.448774	0.00081231	0.00748366
						Pin4	24.0774	0.491001	0.00555141	0.0433442																				Adhfe1	508.556	0.32229	0.000860348	0.0078744
						Pcdhgb5	147.88	0.323614	0.00560145	0.0436182																				Lig1	262.873	0.503711	0.000860757	0.0078744
						Tcf7l1	125.936	0.366878	0.00564048	0.0438275																				Map4k1	66.1067	0.470328	0.000861875	0.00788068
						Ttc12	107.817	0.404983	0.00568009	0.0440457																				Trib1	275.892	0.459157	0.000865742	0.00790812
						Plp2	57.3916	0.497602	0.00568578	0.0440457																				Etnppl	385.8	0.536553	0.000904057	0.00820219
						Pmaip1	22.9856	0.523345	0.00570473	0.0441477																				Prim2	159.503	0.40571	0.000905159	0.00820255
						Tha1	109.775	0.368593	0.00577644	0.0446313																				Tor4a	134.642	0.570369	0.000910866	0.00824201
						Echdc3	26.9325	0.497437	0.00577653	0.0446313																				Pik3r6	66.4815	0.50753	0.000918014	0.00829436
						Ttc7	246.696	0.346677	0.00582355	0.044868																				Lrrc75a	182.938	0.375389	0.000924209	0.00833796
						Susd5	133.021	0.36969	0.00587264	0.0451013																				Stag3	60.9575	0.497687	0.00093698	0.00844068
						Mybl1	56.7039	0.47671	0.00589531	0.0451775																				Mdfi	20.4644	0.610581	0.000963428	0.00861943
						Gjb2	172.363	0.461474	0.0059053	0.0452121																				Mertk	827.307	0.429083	0.000965625	0.00862641
						Amz1	331.159	0.323505	0.00614331	0.0466381																				Crot	761.021	0.365935	0.000974245	0.00869491
						St8sia2	118.972	0.342229	0.00617415	0.0467796																				Bmp4	74.1139	0.481587	0.000976308	0.00870482
						Pex11g	18.2449	0.501773	0.00624391	0.0472148																				Tgif1	47.6291	0.59452	0.000992344	0.00882107
						Cdc45	65.7922	0.477095	0.00627036	0.0473401																				Slc1a5	61.1396	0.573534	0.000992727	0.00882107
						Upp1	81.7463	0.464072	0.00648169	0.048603																				Fhod1	90.3916	0.553596	0.000993341	0.00882224
						Ier5l	156.383	0.402652	0.00653248	0.0489145																				Pou2f2	151.447	0.370763	0.0010022	0.00888794
						Brinp3	317.932	0.350047	0.00666988	0.0496331																				Trim21	68.0541	0.500098	0.00100437	0.00889882
						Ccdc163	64.2331	0.400972	0.00671113	0.0499014																				Gamt	303.295	0.330344	0.0010044	0.00889882
						Stat5a	64.631	0.485763	0.00673376	0.049968																				Galnt6	437.123	0.489068	0.00102084	0.00901823
																														Bst2	142.197	0.625886	0.0010547	0.00928143
																														Tnni2	7.89043	0.544265	0.00107449	0.00943291
																														Adam8	228.825	0.566194	0.00110208	0.00964732
																														Grifin	4.24028	0.50293	0.00119438	0.0103364
																														Herc6	133.06	0.516132	0.00124236	0.0106295
																														Col9a2	137.331	0.489948	0.0012584	0.0107428
																														Isg20	20.3355	0.611725	0.00127433	0.0108687
																														Stra13	218.628	0.375802	0.00129581	0.0110346
																														Rrp8	279.426	0.380414	0.00129642	0.0110346
																														Bcas1	4589.98	0.469908	0.00134278	0.0113361
																														C1qtnf6	89.7646	0.458418	0.00134864	0.0113698
																														Cks1b	52.4124	0.574122	0.00138866	0.011648
																														Angpt1	221.22	0.483037	0.00141001	0.0117892
																														Cyb561a3	360.152	0.324437	0.00142298	0.0118814
																														Fhl3	26.2236	0.598101	0.00144134	0.0119808
																														AB347592	4.55521	0.556301	0.00147938	0.0122794
																														Dysf	77.3199	0.524408	0.00149036	0.0123536
																														Gm973	249.351	0.396861	0.00151387	0.0125201
																														Syt15	35.6529	0.559671	0.00152039	0.0125683
																														Stard9_	31.677	0.548897	0.00152314	0.0125854
																														Fn1	1671.53	0.568026	0.00152701	0.0126116
																														Haus4	82.6861	0.479646	0.00152981	0.0126233
																														Zfp36l2	375.479	0.37289	0.00153075	0.0126254
																														Acy3	43.4028	0.514674	0.00153704	0.0126601
																														Pth1r	179.917	0.433904	0.00154268	0.0127009
																														Pold1	220.404	0.402125	0.00155576	0.012774
																														Pter	49.8181	0.48814	0.00156207	0.0128143
																														Slc44a1	1782.41	0.369766	0.00157097	0.012881
																														Grap	105.027	0.42164	0.00158263	0.0129423
																														Dok3	297.209	0.332589	0.0015835	0.0129436
																														Klf2	93.7148	0.473156	0.00159579	0.0130324
																														Mroh3_	9.31929	0.519477	0.00163986	0.0133209
																														Ccnd1	2002.07	0.366551	0.00164438	0.013334
																														Rnls	19.1159	0.582279	0.00165574	0.0134081
																														Bcl2l11	146.6	0.416976	0.00168887	0.0136281
																														Loxl1	186.676	0.465747	0.00176972	0.014199
																														Gm694	34.9658	0.526089	0.00177324	0.0142147
																														Mtbp	62.308	0.522707	0.0017812	0.0142597
																														Slc40a1	228.217	0.471311	0.00178288	0.014267
																														Txlnb	48.2692	0.512237	0.00181264	0.0144544
																														Amotl1	709.592	0.337154	0.00184668	0.0146788
																														Bub1b	120.642	0.562804	0.00187318	0.0148529
																														Shc4	184.372	0.42111	0.00192207	0.0151813
																														Tcf7l1	125.936	0.409278	0.00198697	0.0155727
																														Pllp	1280.63	0.394133	0.00198886	0.0155795
																														Tubb2a-ps2	267.121	0.353701	0.00201663	0.0157511
																														Mmp2	105.627	0.46849	0.00208292	0.0161927
																														Vwf	476.704	0.537646	0.00216802	0.0167332
																														Hmga2-ps1	34.6076	0.534373	0.00217275	0.0167485
																														Scpep1	371.917	0.41414	0.00221682	0.0170451
																														Nradd	38.7474	0.520456	0.00226579	0.0173196
																														Egln3	115.082	0.429707	0.0023313	0.017701
																														Rgcc	244.664	0.330749	0.00233714	0.0177093
																														Taf13	385.535	0.326676	0.0023461	0.0177699
																														Cenpk	18.2045	0.576614	0.00236187	0.0178597
																														Pex11g	18.2449	0.562222	0.00238535	0.0179925
																														Phlda3	322.63	0.36498	0.00238784	0.0180039
																														Arrdc1	194.728	0.370475	0.0024413	0.0183464
																														Marcks	2007.45	0.326405	0.00245697	0.0184293
																														Proca1	70.6293	0.532748	0.00246556	0.0184831
																														Prr5	174.241	0.423909	0.00249005	0.0186304
																														Spc24	39.4996	0.550442	0.00251623	0.0188012
																														Sox4	244.034	0.340391	0.00252237	0.0188317
																														Kcng4	256.383	0.347543	0.00257829	0.0191787
																														Slc9a9	478.314	0.338666	0.00258136	0.0191859
																														Slc38a3	2368.39	0.362009	0.00259251	0.0192412
																														Gm5617	53.6443	0.471607	0.0026081	0.0193296
																														Nudt1	78.2669	0.426797	0.00263271	0.0194567
																														Traf5	31.0994	0.524412	0.00264942	0.019572
																														Ttc7	246.696	0.377505	0.00265584	0.0195998
																														Erap1	255.661	0.377739	0.00271801	0.019974
																														Emilin2	105.827	0.429603	0.00278278	0.0203843
																														Fam212a	107.442	0.38651	0.00279168	0.0204414
																														Fgd3	211.167	0.336341	0.00284813	0.0207963
																														Blvrb	175.326	0.323878	0.0028824	0.0210214
																														Col2a1	54.0382	0.507025	0.00292521	0.0212911
																														Lonrf3	782.014	0.32615	0.00293869	0.0213807
																														Ano7	8.57488	0.562286	0.00297939	0.0216423
																														Gjb2	172.363	0.498061	0.00299637	0.0217139
																														Timeless	116.015	0.491031	0.00301359	0.0218112
																														Casp6	103.361	0.34572	0.00303547	0.0219537
																														Cd93	167.962	0.530485	0.00306558	0.0221452
																														Nek3	67.5617	0.421633	0.00310495	0.0223856
																														Slc39a8	83.9371	0.493162	0.00312859	0.0225468
																														Trip13	28.4835	0.533887	0.00315149	0.0226404
																														Sgk1	2177.79	0.460546	0.00321909	0.0230445
																														Rasgrp3	344.927	0.35366	0.0032529	0.0232228
																														Cenpl	34.2018	0.50289	0.00330173	0.0235072
																														Hist2h3c1	42.2319	0.493867	0.0033218	0.0236224
																														Thbs1	117.96	0.567704	0.00338178	0.0240303
																														Prrx1	184.897	0.37214	0.00343254	0.0243435
																														Rbm38	58.1095	0.470326	0.00354212	0.0249479
																														F11r	255.705	0.421882	0.00358347	0.0251794
																														Col12a1	278.03	0.450295	0.00363305	0.02544
																														Ncapg2	149.934	0.480645	0.00364311	0.0255004
																														Epx	13.9102	0.538226	0.00367368	0.0256562
																														Cideb	90.8502	0.395723	0.0036973	0.0257809
																														1700019G17Rik	433.847	0.32972	0.00370824	0.0258473
																														Eva1a	234.757	0.356785	0.00371766	0.0258932
																														AK039110	239.347	0.477806	0.00378797	0.0262927
																														Prdx4	241.299	0.372653	0.0038115	0.0264059
																														Grrp1	36.3576	0.509576	0.00388544	0.0268063
																														Tor3a	245.579	0.438119	0.00409954	0.0279561
																														Dnase1l1	41.7095	0.509055	0.00414944	0.0282437
																														Adssl1	349.695	0.40358	0.00418233	0.0284358
																														Tnfsf13b	26.8943	0.506936	0.00419332	0.0284893
																														AK202078	36.0742	0.508977	0.00423304	0.0286845
																														Sh2b2	145.109	0.415208	0.00424534	0.0287417
																														Upp1	81.7463	0.487615	0.0042462	0.0287417
																														Angptl4	78.4917	0.525186	0.00427634	0.0288815
																														C230052I12Rik	116.578	0.325553	0.00429723	0.0289905
																														Ly6c2	10.3755	0.516246	0.00432752	0.0291733
																														Rarres1	23.6803	0.529945	0.0043962	0.0295707
																														Ctbs	167.452	0.34068	0.00442649	0.0296979
																														Cenpo	96.6246	0.356659	0.00444319	0.0297772
																														9530082P21Rik	53.6125	0.454174	0.00453953	0.030356
																														Casp1	54.674	0.50758	0.00458806	0.0305798
																														Padi2	1271.55	0.396407	0.00463569	0.0308536
																														AK039090	30.4765	0.526991	0.0046424	0.0308856
																														Plvap	188.4	0.347316	0.00464759	0.030909
																														Neat1	377.051	0.415076	0.00474031	0.0313885
																														Srpk3	120.695	0.344687	0.00475431	0.0314584
																														Slc41a3	109.742	0.337938	0.00477797	0.0315535
																														Avil	15.395	0.507183	0.0047922	0.031606
																														Casp3	264.246	0.347127	0.00481636	0.031731
																														Sap30	127.741	0.338955	0.00491158	0.0321616
																														Tm6sf2	65.4614	0.390995	0.00496593	0.0324473
																														Tmpo	593.483	0.324843	0.00507188	0.033045
																														AK049914	50.4316	0.499699	0.00523894	0.0339736
																														2810403D21Rik	21.0681	0.505716	0.00536549	0.0345757
																														Alpk1	172.74	0.349814	0.00540956	0.0347616
																														Stc2	77.8937	0.444043	0.00542444	0.0348328
																														Vcam1	846.95	0.364418	0.0055173	0.0352709
																														Cdca7	71.081	0.393041	0.00554414	0.0354214
																														AK043332	37.7763	0.478895	0.00554519	0.0354214
																														Slc2a4	31.6984	0.505168	0.005644	0.035852
																														Gm10863	39.6917	0.475834	0.00566265	0.0359204
																														Tcn2	777.305	0.402236	0.00583671	0.0368328
																														Ptgr1	87.2621	0.438418	0.00585599	0.0368907
																														Kif24	31.6723	0.48493	0.00590331	0.0371376
																														Itga1	118.123	0.397028	0.00605327	0.0378723
																														Mgmt	29.6799	0.476075	0.00609619	0.0381111
																														Fam78a	105.385	0.411442	0.0061706	0.038396
																														Sdf2l1	213.747	0.336613	0.00619653	0.0384773
																														Ttc12	107.817	0.399995	0.00626269	0.0387972
																														Cd274	63.8923	0.415483	0.00632196	0.0390981
																														Cldn11	3448.02	0.438712	0.00652616	0.0400627
																														Erbb2ip	2170.9	0.334896	0.00652965	0.0400706
																														Mfsd7a	27.7471	0.474752	0.00668229	0.0406523
																														Notch3	261.076	0.344485	0.00671042	0.0407826
																														Fam129a	54.2187	0.463697	0.00672677	0.0408684
																														Shisa8	29.5103	0.484175	0.00673663	0.0409147
																														Mir684-1	12.4611	0.492156	0.0068229	0.0412877
																														Chek1	33.7561	0.46884	0.00682824	0.0413063
																														Plekhf2	179.734	0.379929	0.0068646	0.0414713
																														Trim65	68.1029	0.375607	0.00693522	0.0418225
																														Rfc3	125.35	0.342711	0.00701215	0.0421398
																														Smyd1	52.6725	0.415788	0.00707092	0.0424431
																														Zwilch	93.3398	0.445877	0.00710819	0.0426188
																														Scel	49.958	0.417635	0.00717944	0.0429333
																														Tdgf1	19.0285	0.490961	0.00719805	0.0430305
																														E230029C05Rik	44.5718	0.432898	0.00741795	0.0440998
																														Ppl	115.715	0.418986	0.00750782	0.044576
																														Nuak2	54.2494	0.457736	0.00753663	0.0446745
																														Mir6390	56.9721	0.389626	0.00767202	0.0453153
																														Catsper2	103.045	0.331188	0.00776872	0.0457386
																														AB347559	4.90504	0.429119	0.00779263	0.0458102
																														Sema3d	201.764	0.391325	0.00781479	0.0458767
																														AK207499	19.4096	0.495377	0.00782897	0.0459452
																														Tph2	40.0261	0.461236	0.00783436	0.0459621
																														Paqr6	274.263	0.370679	0.00784847	0.0460206
																														Ddx11	53.8812	0.461531	0.00791657	0.0463254
																														Net1	732.783	0.36067	0.00802004	0.046796
																														Ier3	81.2243	0.451396	0.00802904	0.0468335
																														Col3a1	109.741	0.496477	0.00838504	0.0485535
																														Ebi3	28.3869	0.472268	0.00842781	0.0487394
																														Tmem8c	15.6717	0.491514	0.00847	0.0488905
																														AU021092	65.7873	0.402609	0.00860678	0.0494934
																														Pf4	17.7723	0.485605	0.00863541	0.0496414

## Sheet: 29dpi-Hippocampus
Table S1. Differentially expressed genes in all brain regions, times, and conditions. Differential gene expression of each condition as compared to Sham + VH.
29 Days Post Injury - Hippocampus
TBI+VH												Sham+CD												TBI+CD
Down-Regulated						Up-Regulated						Down-Regulated						Up-Regulated						Down-Regulated						Up-Regulated
Gene	Base Mean	Log2 Fold Change	p value	p-adj		Gene	Base Mean	Log2 Fold Change	p value	p-adj		Gene	Base Mean	Log2 Fold Change	p value	p-adj		Gene	Base Mean	Log2 Fold Change	p value	p-adj		Gene	Base Mean	Log2 Fold Change	p value	p-adj		Gene	Base Mean	Log2 Fold Change	p value	p-adj
Tex40	90.7424	-0.36003	5.13034e-05	0.0103834		Lyz2	395.896	1.10517	5.62149e-34	1.10361e-29		None						Arc	2540.15	0.435365	8.0008e-07	0.00947535		Malat1	26215	-0.563394	4.18761e-13	1.82015e-09		C4b	1462.1	0.803758	3.73431e-20	6.49248e-16
Rora	796.695	-0.334309	0.000106387	0.0188161		Gpnmb	228.292	1.10622	1.51739e-32	1.48947e-28														Grin2b	1341.27	-0.366425	3.0663e-05	0.0152316		Lyz2	395.896	0.633906	3.02004e-15	2.62532e-11
						C4b	1462.1	1.03717	6.46373e-31	4.22986e-27														AK078656	96.6867	-0.333938	0.000131227	0.0425004		C3	98.7245	0.527177	1.92377e-13	1.11489e-09
						Vim	1265.98	0.959312	1.06376e-25	5.22092e-22																				Gpnmb	228.292	0.583639	2.24639e-12	7.81115e-09
						Clec7a	42.7502	0.849375	2.64983e-22	1.04043e-18																				Itgax	39.6018	0.324673	4.57e-12	1.32423e-08
						Mpeg1	673.493	0.762385	2.41335e-21	7.89649e-18																				Clec7a	42.7502	0.456021	1.98128e-11	4.92093e-08
						C3	98.7245	0.717815	3.08169e-19	8.64282e-16																				GU332589	199.63	0.548805	2.75905e-10	5.99611e-07
						Itgax	39.6018	0.569964	2.86987e-18	7.04265e-15																				Vim	1265.98	0.543386	4.00636e-10	7.73939e-07
						Cd68	265.621	0.675533	2.3871e-15	5.20705e-12																				Thbs4	513.769	0.487782	1.51379e-08	2.63188e-05
						Thbs4	513.769	0.695099	1.21616e-14	2.38756e-11																				Mpeg1	673.493	0.442203	1.99229e-08	3.14891e-05
						Flnc	101.085	0.725971	1.37933e-14	2.46172e-11																				Cst7	15.3735	0.328616	4.49849e-08	6.51756e-05
						P4ha3	92.5892	0.677402	1.45011e-13	2.37237e-10																				Cd68	265.621	0.449791	5.80534e-08	7.76397e-05
						Ctss	1556.17	0.565467	3.725e-13	5.62532e-10																				Lag3	115.163	0.434912	5.03007e-07	0.000623238
						Lag3	115.163	0.648788	7.23184e-13	1.01411e-09																				Flnc	101.085	0.438609	7.59672e-07	0.000825479
						H2-D1	579.361	0.550047	8.06393e-13	1.05541e-09																				P4ha3	92.5892	0.428571	1.04894e-06	0.00102571
						Ggta1	135.786	0.65404	1.37772e-12	1.69046e-09																				Ctss	1556.17	0.37598	1.06194e-06	0.00102571
						Cst7	15.3735	0.562739	1.52395e-12	1.75989e-09																				Osmr	147.743	0.427	1.29991e-06	0.00118949
						S1pr3	233.49	0.624507	2.94196e-12	3.2087e-09																				Ggta1	135.786	0.427597	1.46994e-06	0.00127782
						S100a6	185.251	0.626389	8.6696e-12	8.95797e-09																				Fcer1g	182.822	0.379068	1.7096e-06	0.00141539
						Osmr	147.743	0.617617	1.58944e-11	1.5602e-08																				Laptm5	555.885	0.342386	2.13543e-06	0.00168758
						Tyrobp	310.972	0.544927	6.85899e-11	6.41217e-08																				H2-D1	579.361	0.353089	3.03457e-06	0.00229387
						Anxa5	1098.68	0.401527	8.63906e-11	7.70918e-08																				Cmtm3	198.939	0.377551	4.10919e-06	0.00285769
						Trem2	241.081	0.539272	2.92906e-10	2.39597e-07																				Ly86	209.5	0.354534	5.3382e-06	0.00356961
						C1qa	1217.64	0.526994	4.36206e-10	3.42544e-07																				Nfkbia	361.413	0.398936	7.86475e-06	0.00506432
						Fcgr2b	72.4696	0.543747	9.85433e-10	7.44078e-07																				S1pr3	233.49	0.383186	9.34733e-06	0.00580402
						S100a4	76.9162	0.509526	1.36482e-09	9.92378e-07																				Fcgr2b	72.4696	0.36212	1.27523e-05	0.0076452
						Capg	63.1258	0.530463	3.58283e-09	2.34699e-06																				Slc11a1	60.7556	0.372593	1.99192e-05	0.0111715
						C1qb	1142.08	0.493287	3.58647e-09	2.34699e-06																				Tyrobp	310.972	0.343077	2.53698e-05	0.0137837
						C1qc	939.012	0.481643	7.48818e-09	4.74219e-06																				Crispld2	54.7975	0.384374	2.8255e-05	0.0148861
						Spp1	303.259	0.465561	7.84792e-09	4.8147e-06																				Esyt1	160.276	0.365399	3.57934e-05	0.0172862
						Itgb2	127.234	0.484807	1.31484e-08	7.59206e-06																				S100a6	185.251	0.354654	3.94841e-05	0.018065
						Ly86	209.5	0.452251	1.43948e-08	8.07425e-06																				C1qa	1217.64	0.337769	4.89657e-05	0.0212829
						Cd44	145.975	0.52349	1.55763e-08	8.49426e-06																				Ddit4	700.663	0.332097	5.48072e-05	0.0232409
						Fcer1g	182.822	0.450809	2.57974e-08	1.3688e-05																				Tob2	426.268	0.326374	6.15175e-05	0.0248731
						Lilrb4	20.6447	0.409596	3.4996e-08	1.808e-05																				St8sia2	101.249	0.35346	7.28441e-05	0.0281437
						Myo1f	69.1741	0.500371	4.3559e-08	2.19269e-05																				C4a	113.627	0.346763	8.80333e-05	0.0332728
						Abca1	1230.28	0.384452	5.40885e-08	2.65466e-05																				Glipr2	75.861	0.346405	9.00721e-05	0.033319
						Csf1r	2174.62	0.332501	5.6697e-08	2.71482e-05
						Cybrd1	149.061	0.479783	7.10986e-08	3.32335e-05
						C3ar1	50.3938	0.478645	7.65327e-08	3.49416e-05
						Ptprc	76.0424	0.49109	9.14557e-08	4.08059e-05
						Unc93b1	344.09	0.417547	1.31496e-07	5.73674e-05
						Aspg	74.9588	0.468325	1.61617e-07	6.89753e-05
						Hexb	1802.28	0.335412	2.04835e-07	8.55602e-05
						Slc11a1	60.7556	0.464551	2.32232e-07	9.49828e-05
						Laptm5	555.885	0.378088	2.42804e-07	9.69927e-05
						Gfap	11463.6	0.435962	3.23374e-07	0.000119783
						Cd84	68.7137	0.462991	7.69246e-07	0.000266241
						H2-K1	494.395	0.423003	7.73011e-07	0.000266241
						Cyba	93.162	0.444385	8.2034e-07	0.000277671
						Csf3r	153.474	0.430482	1.32173e-06	0.000439277
						Slc14a1	513.991	0.42703	1.36241e-06	0.000439277
						Msn	670.708	0.364051	1.36491e-06	0.000439277
						Ctsh	230.542	0.400261	3.35541e-06	0.00101344
						AF251705	57.2998	0.408805	4.00298e-06	0.0011907
						Adgre1	106.216	0.420575	4.24385e-06	0.00124351
						Ctsz	843.166	0.336033	4.37239e-06	0.00126234
						Nckap1l	283.048	0.338708	5.49219e-06	0.00156265
						Serpina3n	1975.53	0.403147	7.1264e-06	0.0019782
						Cd52	23.2111	0.36072	7.15426e-06	0.0019782
						Kcne1l	100.509	0.403657	1.09663e-05	0.00290933
						Tlr2	34.3327	0.35233	1.62282e-05	0.004192
						Anxa2	219.679	0.389565	2.11172e-05	0.00538406
						Gbp2	84.5952	0.382011	2.36108e-05	0.00577764
						Hvcn1	65.0506	0.384113	2.51079e-05	0.0060112
						Cmtm3	198.939	0.345352	3.06778e-05	0.00716985
						Glipr2	75.861	0.369902	3.18466e-05	0.00735545
						Cyr61	78.1427	0.37596	3.63348e-05	0.00810597
						Tlr7	63.3187	0.373508	3.68636e-05	0.00813154
						Tnfrsf1b	80.9495	0.372015	3.99244e-05	0.00870885
						C4a	113.627	0.360803	4.88856e-05	0.0102098
						Aldh1l2	118.231	0.374912	5.04788e-05	0.0103229
						Emp1	57.8248	0.365555	7.61339e-05	0.0147986
						Fcgr3	258.962	0.346071	8.33403e-05	0.0157321
						Slc15a3	51.6479	0.36005	8.87863e-05	0.0164439
						Entpd2	279.206	0.325545	9.63737e-05	0.0175186
						Cmklr1	72.2651	0.347611	0.000104912	0.0187239
						Ptpn6	101.731	0.345167	0.000119093	0.0205091
						Ncf1	152.627	0.336773	0.000121866	0.0206247
						Pros1	272.538	0.329098	0.000126223	0.0211795
						St8sia2	101.249	0.339296	0.000144073	0.0235704
						Pdlim4	169.345	0.33971	0.000150065	0.0243477
						Gem	44.0372	0.325628	0.000160678	0.0256458
						Tnfrsf1a	202.406	0.323965	0.000185957	0.0287458
						Cxcl16	41.0466	0.343274	0.000188197	0.0288646
						Clic1	194.776	0.328244	0.000253255	0.0365582
						Dock2	111.443	0.329294	0.000259437	0.0369077
																														Prrx1	184.897	0.37214	0.00343254	0.0243435
																														Rbm38	58.1095	0.470326	0.00354212	0.0249479
																														F11r	255.705	0.421882	0.00358347	0.0251794
																														Col12a1	278.03	0.450295	0.00363305	0.02544
																														Ncapg2	149.934	0.480645	0.00364311	0.0255004
																														Epx	13.9102	0.538226	0.00367368	0.0256562
																														Cideb	90.8502	0.395723	0.0036973	0.0257809
																														1700019G17Rik	433.847	0.32972	0.00370824	0.0258473
																														Eva1a	234.757	0.356785	0.00371766	0.0258932
																														AK039110	239.347	0.477806	0.00378797	0.0262927
																														Prdx4	241.299	0.372653	0.0038115	0.0264059
																														Grrp1	36.3576	0.509576	0.00388544	0.0268063
																														Tor3a	245.579	0.438119	0.00409954	0.0279561
																														Dnase1l1	41.7095	0.509055	0.00414944	0.0282437
																														Adssl1	349.695	0.40358	0.00418233	0.0284358
																														Tnfsf13b	26.8943	0.506936	0.00419332	0.0284893
																														AK202078	36.0742	0.508977	0.00423304	0.0286845
																														Sh2b2	145.109	0.415208	0.00424534	0.0287417
																														Upp1	81.7463	0.487615	0.0042462	0.0287417
																														Angptl4	78.4917	0.525186	0.00427634	0.0288815
																														C230052I12Rik	116.578	0.325553	0.00429723	0.0289905
																														Ly6c2	10.3755	0.516246	0.00432752	0.0291733
																														Rarres1	23.6803	0.529945	0.0043962	0.0295707
																														Ctbs	167.452	0.34068	0.00442649	0.0296979
																														Cenpo	96.6246	0.356659	0.00444319	0.0297772
																														9530082P21Rik	53.6125	0.454174	0.00453953	0.030356
																														Casp1	54.674	0.50758	0.00458806	0.0305798
																														Padi2	1271.55	0.396407	0.00463569	0.0308536
																														AK039090	30.4765	0.526991	0.0046424	0.0308856
																														Plvap	188.4	0.347316	0.00464759	0.030909
																														Neat1	377.051	0.415076	0.00474031	0.0313885
																														Srpk3	120.695	0.344687	0.00475431	0.0314584
																														Slc41a3	109.742	0.337938	0.00477797	0.0315535
																														Avil	15.395	0.507183	0.0047922	0.031606
																														Casp3	264.246	0.347127	0.00481636	0.031731
																														Sap30	127.741	0.338955	0.00491158	0.0321616
																														Tm6sf2	65.4614	0.390995	0.00496593	0.0324473
																														Tmpo	593.483	0.324843	0.00507188	0.033045
																														AK049914	50.4316	0.499699	0.00523894	0.0339736
																														2810403D21Rik	21.0681	0.505716	0.00536549	0.0345757
																														Alpk1	172.74	0.349814	0.00540956	0.0347616
																														Stc2	77.8937	0.444043	0.00542444	0.0348328
																														Vcam1	846.95	0.364418	0.0055173	0.0352709
																														Cdca7	71.081	0.393041	0.00554414	0.0354214
																														AK043332	37.7763	0.478895	0.00554519	0.0354214
																														Slc2a4	31.6984	0.505168	0.005644	0.035852
																														Gm10863	39.6917	0.475834	0.00566265	0.0359204
																														Tcn2	777.305	0.402236	0.00583671	0.0368328
																														Ptgr1	87.2621	0.438418	0.00585599	0.0368907
																														Kif24	31.6723	0.48493	0.00590331	0.0371376
																														Itga1	118.123	0.397028	0.00605327	0.0378723
																														Mgmt	29.6799	0.476075	0.00609619	0.0381111
																														Fam78a	105.385	0.411442	0.0061706	0.038396
																														Sdf2l1	213.747	0.336613	0.00619653	0.0384773
																														Ttc12	107.817	0.399995	0.00626269	0.0387972
																														Cd274	63.8923	0.415483	0.00632196	0.0390981
																														Cldn11	3448.02	0.438712	0.00652616	0.0400627
																														Erbb2ip	2170.9	0.334896	0.00652965	0.0400706
																														Mfsd7a	27.7471	0.474752	0.00668229	0.0406523
																														Notch3	261.076	0.344485	0.00671042	0.0407826
																														Fam129a	54.2187	0.463697	0.00672677	0.0408684
																														Shisa8	29.5103	0.484175	0.00673663	0.0409147
																														Mir684-1	12.4611	0.492156	0.0068229	0.0412877
																														Chek1	33.7561	0.46884	0.00682824	0.0413063
																														Plekhf2	179.734	0.379929	0.0068646	0.0414713
																														Trim65	68.1029	0.375607	0.00693522	0.0418225
																														Rfc3	125.35	0.342711	0.00701215	0.0421398
																														Smyd1	52.6725	0.415788	0.00707092	0.0424431
																														Zwilch	93.3398	0.445877	0.00710819	0.0426188
																														Scel	49.958	0.417635	0.00717944	0.0429333
																														Tdgf1	19.0285	0.490961	0.00719805	0.0430305
																														E230029C05Rik	44.5718	0.432898	0.00741795	0.0440998
																														Ppl	115.715	0.418986	0.00750782	0.044576
																														Nuak2	54.2494	0.457736	0.00753663	0.0446745
																														Mir6390	56.9721	0.389626	0.00767202	0.0453153
																														Catsper2	103.045	0.331188	0.00776872	0.0457386
																														AB347559	4.90504	0.429119	0.00779263	0.0458102
																														Sema3d	201.764	0.391325	0.00781479	0.0458767
																														AK207499	19.4096	0.495377	0.00782897	0.0459452
																														Tph2	40.0261	0.461236	0.00783436	0.0459621
																														Paqr6	274.263	0.370679	0.00784847	0.0460206
																														Ddx11	53.8812	0.461531	0.00791657	0.0463254
																														Net1	732.783	0.36067	0.00802004	0.046796
																														Ier3	81.2243	0.451396	0.00802904	0.0468335
																														Col3a1	109.741	0.496477	0.00838504	0.0485535
																														Ebi3	28.3869	0.472268	0.00842781	0.0487394
																														Tmem8c	15.6717	0.491514	0.00847	0.0488905
																														AU021092	65.7873	0.402609	0.00860678	0.0494934
																														Pf4	17.7723	0.485605	0.00863541	0.0496414

## Sheet: 3dpi-Thalamus
Supplementary Table 1. Differentially expressed genes in all brain regions, times, and conditions. Differential gene expression of each condition as compared to Sham + VH.
3 Days Post Injury - Thalamus
TBI+VH												Sham+CD												TBI+CD
Down-Regulated						Up-Regulated						Down-Regulated						Up-Regulated						Down-Regulated						Up-Regulated
Gene	Base Mean	Log2 Fold Change	p value	p-adj		Gene	Base Mean	Log2 Fold Change	p value	p-adj		Gene	Base Mean	Log2 Fold Change	p value	p-adj		Gene	Base Mean	Log2 Fold Change	p value	p-adj		Gene	Base Mean	Log2 Fold Change	p value	p-adj		Gene	Base Mean	Log2 Fold Change	p value	p-adj
None						Tyrobp	337.486	0.644912	4.24843e-20	7.05146e-16		None						Kif13b	1170.35	0.330407	1.37579e-06	0.00807463		None						Tyrobp	337.486	0.664427	6.00955e-21	1.12775e-16
						Ly86	267.846	0.733083	7.69978e-20	7.05146e-16								Gjc3	1835.15	0.340247	2.47736e-06	0.00807463								Ly86	267.846	0.745375	2.40825e-20	2.25966e-16
						Olfml3	525.562	0.673275	3.36169e-17	2.05242e-13								Adamts4	801.038	0.366273	7.67522e-06	0.0176645								Olfml3	525.562	0.676519	2.65696e-17	1.66202e-13
						Fcrls	461.858	0.635615	6.98321e-15	3.19761e-11																				C1qa	1006.81	0.642642	1.02769e-16	4.8214e-13
						Mki67	42.4002	0.477756	2.78143e-12	1.01889e-08																				Fcrls	461.858	0.604752	1.0937e-13	4.10488e-10
						Csf1r	2356.79	0.436095	3.69234e-12	1.12715e-08																				C1qb	1116.56	0.59246	1.56818e-13	4.90475e-10
						Top2a	36.4268	0.437811	5.27375e-12	1.37991e-08																				Cd68	219.818	0.595596	4.81538e-13	1.29093e-09
						C1qa	1006.81	0.519758	1.34068e-11	3.06948e-08																				Laptm5	585.355	0.548139	1.29014e-12	3.02634e-09
						Itgam	571.897	0.496642	1.9593e-11	3.98739e-08																				Itgam	571.897	0.522538	2.10853e-12	4.39652e-09
						Cd68	219.818	0.545324	2.594e-11	4.75118e-08																				C4b	977.735	0.471448	9.0923e-12	1.70626e-08
						Laptm5	585.355	0.502756	6.29914e-11	1.04886e-07																				Csf1r	2356.79	0.414743	4.29557e-11	7.08386e-08
						C4b	977.735	0.441085	8.28686e-11	1.26485e-07																				Mki67	42.4002	0.433979	4.5298e-11	7.08386e-08
						C1qc	1057.89	0.507007	2.22584e-10	3.13604e-07																				Lcp1	270.412	0.505297	7.92538e-11	1.14406e-07
						C1qb	1116.56	0.502221	2.87671e-10	3.76356e-07																				C1qc	1057.89	0.516246	1.10979e-10	1.48759e-07
						Hexb	2282.59	0.430753	7.34799e-10	8.97239e-07																				Top2a	36.4268	0.378292	2.3997e-10	3.00219e-07
						D17H6S56E-5	54.1516	0.469936	8.52705e-10	9.76134e-07																				D17H6S56E-5	54.1516	0.477643	4.43423e-10	4.98611e-07
						Cx3cr1	990.381	0.395446	4.39362e-09	4.73374e-06																				BC019819	62.2674	0.495862	4.51689e-10	4.98611e-07
						Nckap1l	282.208	0.43852	5.33149e-09	5.42509e-06																				Nckap1l	282.208	0.465366	7.86103e-10	8.19556e-07
						Mpeg1	610.584	0.461992	1.57436e-08	1.51267e-05																				Tmem119	509.041	0.469194	8.78835e-10	8.68012e-07
						Irf8	102.336	0.459281	1.65174e-08	1.51267e-05																				Selplg	761.106	0.420296	1.97012e-09	1.84856e-06
						Aif1	90.4364	0.463137	1.89706e-08	1.6546e-05																				Irf8	102.336	0.485342	3.14695e-09	2.81217e-06
						C3ar1	45.39	0.454598	2.43748e-08	2.02931e-05																				Trem2	238.083	0.471852	3.99599e-09	3.40858e-06
						Bin2	144.453	0.45425	2.87533e-08	2.28976e-05																				Ctss	1293.34	0.41449	8.38143e-09	6.83852e-06
						Selplg	761.106	0.386019	3.10139e-08	2.36688e-05																				Ctsz	801.195	0.417226	3.52718e-08	2.75796e-05
						Lcp1	270.412	0.41616	6.50719e-08	4.76743e-05																				Hexb	2282.59	0.383721	4.17048e-08	3.13053e-05
						Trem2	238.083	0.426735	8.75824e-08	6.16984e-05																				Mpeg1	610.584	0.442364	5.90571e-08	4.26256e-05
						Tmem119	509.041	0.4034	1.17376e-07	7.96242e-05																				Aif1	90.4364	0.436359	1.07866e-07	7.21512e-05
						Ctss	1293.34	0.369315	2.62622e-07	0.000171792																				Itgb2	154.636	0.435715	1.09191e-07	7.21512e-05
						Iqgap3	19.3486	0.334508	6.50813e-07	0.000384526																				Cx3cr1	990.381	0.358935	1.11499e-07	7.21512e-05
						Cd180	57.6511	0.345855	6.82914e-07	0.000390883																				Fermt3	104.009	0.439651	1.19332e-07	7.4646e-05
						Siglech	320.796	0.361369	1.09685e-06	0.000590877																				Siglech	320.796	0.387776	2.09294e-07	0.000126697
						Fcer1g	156.297	0.38742	1.57503e-06	0.000808925																				Cyth4	259.242	0.388203	2.31096e-07	0.000135523
						Fcgr3	228.855	0.39063	1.58994e-06	0.000808925																				Lat2	51.6249	0.408096	3.95969e-07	0.000225174
						Ctsz	801.195	0.354145	2.60771e-06	0.00129089																				Arhgdib	168.553	0.401967	6.7955e-07	0.000364321
						Ptgs1	202.4	0.346364	2.71341e-06	0.00130786																				Fcer1g	156.297	0.40227	6.99395e-07	0.000364321
						Cd53	138.863	0.373724	3.22472e-06	0.00151446																				Iqgap3	19.3486	0.328489	7.33959e-07	0.000364321
						Aspg	61.4722	0.341973	4.25902e-06	0.0019502																				Bin2	144.453	0.402941	7.99032e-07	0.000384478
						Rasal3	67.3403	0.360878	4.79888e-06	0.00214381																				Inpp5d	275.283	0.39319	1.2164e-06	0.000556754
						Itgb2	154.636	0.368216	5.47339e-06	0.00238692																				Myo1f	80.3833	0.393107	2.09034e-06	0.000912262
						BC019819	62.2674	0.340395	5.97468e-06	0.00254494																				Pld4	235.867	0.386177	2.66363e-06	0.00113604
						Cyth4	259.242	0.33541	6.54599e-06	0.00266436																				Parvg	96.9966	0.388968	2.75803e-06	0.00115016
						Ccl6	30.4299	0.330563	7.64096e-06	0.00302591																				Syk	98.3657	0.389356	2.82799e-06	0.0011537
						Pik3cg	77.4316	0.371759	7.76468e-06	0.00302591																				Gal3st4	94.0517	0.383181	3.30516e-06	0.00124049
						Slc15a3	53.8303	0.352268	1.36006e-05	0.00508386																				Fcgr3	228.855	0.377648	3.57019e-06	0.00131369
						Gal3st4	94.0517	0.353145	1.6016e-05	0.00586698																				Sla	68.429	0.363945	4.97113e-06	0.00176016
						Sla	68.429	0.340247	1.71651e-05	0.00604609																				Grn	1746.25	0.332883	5.35935e-06	0.00186247
						Mafb	115.058	0.350787	1.84681e-05	0.00626987																				Rac2	69.8636	0.354341	5.91699e-06	0.00201888
						Inpp5d	275.283	0.344987	1.84851e-05	0.00626987																				Clec5a	46.2735	0.364241	6.92516e-06	0.00227996
						Clec5a	46.2735	0.344686	2.0157e-05	0.00671264																				Mcm5	99.1438	0.368368	7.74897e-06	0.00250719
						Lyz2	177.329	0.341152	2.36967e-05	0.00767499																				Adgre1	114.281	0.363048	7.94325e-06	0.00252649
						Wdfy4	68.2074	0.33753	3.6205e-05	0.0106956																				Kcnk6	79.9838	0.369255	8.12957e-06	0.00254266
						Lgals9	137.133	0.33068	4.93159e-05	0.0141136																				Anxa3	191.702	0.347684	8.47651e-06	0.00260771
						S100a6	113.017	0.341454	5.61292e-05	0.0158163																				Cd53	138.863	0.355036	1.06453e-05	0.00317096
						Myo1f	80.3833	0.324692	7.28133e-05	0.0191119																				Apobec3	58.673	0.341403	1.1939e-05	0.00350075
						Pld4	235.867	0.322906	7.30418e-05	0.0191119																				Ncf1	163.755	0.359908	1.25041e-05	0.00351392
						Kcnk6	79.9838	0.322022	8.88833e-05	0.0214209																				Hmox1	114.773	0.361835	1.25457e-05	0.00351392
																														Egr1	1037.65	0.352201	1.36347e-05	0.00376277
																														Lgals9	137.133	0.355597	1.41368e-05	0.00381147
																														Sgk1	2367.15	0.333061	1.42174e-05	0.00381147
																														Irf7	43.4193	0.337232	1.62046e-05	0.00422356
																														Mafb	115.058	0.351323	1.89817e-05	0.00481367
																														C3ar1	45.39	0.329613	2.4011e-05	0.00572422
																														Lyz2	177.329	0.338912	2.6381e-05	0.0060034
																														Il10ra	109.367	0.346291	2.77305e-05	0.00619514
																														Blnk	56.9296	0.329264	4.48973e-05	0.00946677
																														Vav1	79.4026	0.332333	5.55225e-05	0.0115303

## Sheet: 29dpi-Thalamus
Supplementary Table 1. Differentially expressed genes in all brain regions, times, and conditions. Differential gene expression of each condition as compared to Sham + VH.
29 Days Post Injury - Thalamus
TBI+VH												Sham+CD												TBI+CD
Down-Regulated						Up-Regulated						Down-Regulated						Up-Regulated						Down-Regulated						Up-Regulated
Gene	Base Mean	Log2 Fold Change	p value	p-adj		Gene	Base Mean	Log2 Fold Change	p value	p-adj		Gene	Base Mean	Log2 Fold Change	p value	p-adj		Gene	Base Mean	Log2 Fold Change	p value	p-adj		Gene	Base Mean	Log2 Fold Change	p value	p-adj		Gene	Base Mean	Log2 Fold Change	p value	p-adj
None						None						None						None						Malat1	16898	-0.426488	5.28679e-10	8.76762e-06		Ddit4	785.889	0.355684	8.73791e-08	0.000280929
																														Arl4d	174.926	0.375614	1.01639e-07	0.000280929
																														Nfkbia	440.124	0.391739	5.12516e-07	0.00121422
																														Dock2	135.006	0.327448	2.8411e-05	0.0329637
																														Prrx1	184.897	0.37214	0.00343254	0.0243435
																														Rbm38	58.1095	0.470326	0.00354212	0.0249479
																														F11r	255.705	0.421882	0.00358347	0.0251794
																														Col12a1	278.03	0.450295	0.00363305	0.02544
																														Ncapg2	149.934	0.480645	0.00364311	0.0255004
																														Epx	13.9102	0.538226	0.00367368	0.0256562
																														Cideb	90.8502	0.395723	0.0036973	0.0257809
																														1700019G17Rik	433.847	0.32972	0.00370824	0.0258473
																														Eva1a	234.757	0.356785	0.00371766	0.0258932
																														AK039110	239.347	0.477806	0.00378797	0.0262927
																														Prdx4	241.299	0.372653	0.0038115	0.0264059
																														Grrp1	36.3576	0.509576	0.00388544	0.0268063
																														Tor3a	245.579	0.438119	0.00409954	0.0279561
																														Dnase1l1	41.7095	0.509055	0.00414944	0.0282437
																														Adssl1	349.695	0.40358	0.00418233	0.0284358
																														Tnfsf13b	26.8943	0.506936	0.00419332	0.0284893
																														AK202078	36.0742	0.508977	0.00423304	0.0286845
																														Sh2b2	145.109	0.415208	0.00424534	0.0287417
																														Upp1	81.7463	0.487615	0.0042462	0.0287417
																														Angptl4	78.4917	0.525186	0.00427634	0.0288815
																														C230052I12Rik	116.578	0.325553	0.00429723	0.0289905
																														Ly6c2	10.3755	0.516246	0.00432752	0.0291733
																														Rarres1	23.6803	0.529945	0.0043962	0.0295707
																														Ctbs	167.452	0.34068	0.00442649	0.0296979
																														Cenpo	96.6246	0.356659	0.00444319	0.0297772
																														9530082P21Rik	53.6125	0.454174	0.00453953	0.030356
																														Casp1	54.674	0.50758	0.00458806	0.0305798
																														Padi2	1271.55	0.396407	0.00463569	0.0308536
																														AK039090	30.4765	0.526991	0.0046424	0.0308856
																														Plvap	188.4	0.347316	0.00464759	0.030909
																														Neat1	377.051	0.415076	0.00474031	0.0313885
																														Srpk3	120.695	0.344687	0.00475431	0.0314584
																														Slc41a3	109.742	0.337938	0.00477797	0.0315535
																														Avil	15.395	0.507183	0.0047922	0.031606
																														Casp3	264.246	0.347127	0.00481636	0.031731
																														Sap30	127.741	0.338955	0.00491158	0.0321616
																														Tm6sf2	65.4614	0.390995	0.00496593	0.0324473
																														Tmpo	593.483	0.324843	0.00507188	0.033045
																														AK049914	50.4316	0.499699	0.00523894	0.0339736
																														2810403D21Rik	21.0681	0.505716	0.00536549	0.0345757
																														Alpk1	172.74	0.349814	0.00540956	0.0347616
																														Stc2	77.8937	0.444043	0.00542444	0.0348328
																														Vcam1	846.95	0.364418	0.0055173	0.0352709
																														Cdca7	71.081	0.393041	0.00554414	0.0354214
																														AK043332	37.7763	0.478895	0.00554519	0.0354214
																														Slc2a4	31.6984	0.505168	0.005644	0.035852
																														Gm10863	39.6917	0.475834	0.00566265	0.0359204
																														Tcn2	777.305	0.402236	0.00583671	0.0368328
																														Ptgr1	87.2621	0.438418	0.00585599	0.0368907
																														Kif24	31.6723	0.48493	0.00590331	0.0371376
																														Itga1	118.123	0.397028	0.00605327	0.0378723
																														Mgmt	29.6799	0.476075	0.00609619	0.0381111
																														Fam78a	105.385	0.411442	0.0061706	0.038396
																														Sdf2l1	213.747	0.336613	0.00619653	0.0384773
																														Ttc12	107.817	0.399995	0.00626269	0.0387972
																														Cd274	63.8923	0.415483	0.00632196	0.0390981
																														Cldn11	3448.02	0.438712	0.00652616	0.0400627
																														Erbb2ip	2170.9	0.334896	0.00652965	0.0400706
																														Mfsd7a	27.7471	0.474752	0.00668229	0.0406523
																														Notch3	261.076	0.344485	0.00671042	0.0407826
																														Fam129a	54.2187	0.463697	0.00672677	0.0408684
																														Shisa8	29.5103	0.484175	0.00673663	0.0409147
																														Mir684-1	12.4611	0.492156	0.0068229	0.0412877
																														Chek1	33.7561	0.46884	0.00682824	0.0413063
																														Plekhf2	179.734	0.379929	0.0068646	0.0414713
																														Trim65	68.1029	0.375607	0.00693522	0.0418225
																														Rfc3	125.35	0.342711	0.00701215	0.0421398
																														Smyd1	52.6725	0.415788	0.00707092	0.0424431
																														Zwilch	93.3398	0.445877	0.00710819	0.0426188
																														Scel	49.958	0.417635	0.00717944	0.0429333
																														Tdgf1	19.0285	0.490961	0.00719805	0.0430305
																														E230029C05Rik	44.5718	0.432898	0.00741795	0.0440998
																														Ppl	115.715	0.418986	0.00750782	0.044576
																														Nuak2	54.2494	0.457736	0.00753663	0.0446745
																														Mir6390	56.9721	0.389626	0.00767202	0.0453153
																														Catsper2	103.045	0.331188	0.00776872	0.0457386
																														AB347559	4.90504	0.429119	0.00779263	0.0458102
																														Sema3d	201.764	0.391325	0.00781479	0.0458767
																														AK207499	19.4096	0.495377	0.00782897	0.0459452
																														Tph2	40.0261	0.461236	0.00783436	0.0459621
																														Paqr6	274.263	0.370679	0.00784847	0.0460206
																														Ddx11	53.8812	0.461531	0.00791657	0.0463254
																														Net1	732.783	0.36067	0.00802004	0.046796
																														Ier3	81.2243	0.451396	0.00802904	0.0468335
																														Col3a1	109.741	0.496477	0.00838504	0.0485535
																														Ebi3	28.3869	0.472268	0.00842781	0.0487394
																														Tmem8c	15.6717	0.491514	0.00847	0.0488905
																														AU021092	65.7873	0.402609	0.00860678	0.0494934
																														Pf4	17.7723	0.485605	0.00863541	0.0496414

## Sheet: 3dpi-Hypothalamus
Supplementary Table 1. Differentially expressed genes in all brain regions, times, and conditions. Differential gene expression of each condition as compared to Sham + VH.
3 Days Post Injury - Hypothalamus
TBI+VH												Sham+CD												TBI+CD
Down-Regulated						Up-Regulated						Down-Regulated						Up-Regulated						Down-Regulated						Up-Regulated
Gene	Base Mean	Log2 Fold Change	p value	p-adj		Gene	Base Mean	Log2 Fold Change	p value	p-adj		Gene	Base Mean	Log2 Fold Change	p value	p-adj		Gene	Base Mean	Log2 Fold Change	p value	p-adj		Gene	Base Mean	Log2 Fold Change	p value	p-adj		Gene	Base Mean	Log2 Fold Change	p value	p-adj
None						None						None						None						None						C4b	1625.41	0.348907	6.53987e-08	0.00156957

## Sheet: 29dpi-Hypothalamus
Supplementary Table 1. Differentially expressed genes in all brain regions, times, and conditions. Differential gene expression of each condition as compared to Sham + VH.
29 Days Post Injury - Hypothalamus
TBI+VH												Sham+CD												TBI+CD
Down-Regulated						Up-Regulated						Down-Regulated						Up-Regulated						Down-Regulated						Up-Regulated
Gene	Base Mean	Log2 Fold Change	p value	p-adj		Gene	Base Mean	Log2 Fold Change	p value	p-adj		Gene	Base Mean	Log2 Fold Change	p value	p-adj		Gene	Base Mean	Log2 Fold Change	p value	p-adj		Gene	Base Mean	Log2 Fold Change	p value	p-adj		Gene	Base Mean	Log2 Fold Change	p value	p-adj
None						Malat1	14044.1	0.45726	4.22828e-10	1.01678e-05		None						Egr1	1190.27	0.390684	1.84407e-08	0.00012287		None						Egr1	1190.27	0.350043	3.76959e-07	0.00906472
						BC071253	3282.4	0.327785	3.13002e-06	0.0376338
																														Prrx1	184.897	0.37214	0.00343254	0.0243435
																														Rbm38	58.1095	0.470326	0.00354212	0.0249479
																														F11r	255.705	0.421882	0.00358347	0.0251794
																														Col12a1	278.03	0.450295	0.00363305	0.02544
																														Ncapg2	149.934	0.480645	0.00364311	0.0255004
																														Epx	13.9102	0.538226	0.00367368	0.0256562
																														Cideb	90.8502	0.395723	0.0036973	0.0257809
																														1700019G17Rik	433.847	0.32972	0.00370824	0.0258473
																														Eva1a	234.757	0.356785	0.00371766	0.0258932
																														AK039110	239.347	0.477806	0.00378797	0.0262927
																														Prdx4	241.299	0.372653	0.0038115	0.0264059
																														Grrp1	36.3576	0.509576	0.00388544	0.0268063
																														Tor3a	245.579	0.438119	0.00409954	0.0279561
																														Dnase1l1	41.7095	0.509055	0.00414944	0.0282437
																														Adssl1	349.695	0.40358	0.00418233	0.0284358
																														Tnfsf13b	26.8943	0.506936	0.00419332	0.0284893
																														AK202078	36.0742	0.508977	0.00423304	0.0286845
																														Sh2b2	145.109	0.415208	0.00424534	0.0287417
																														Upp1	81.7463	0.487615	0.0042462	0.0287417
																														Angptl4	78.4917	0.525186	0.00427634	0.0288815
																														C230052I12Rik	116.578	0.325553	0.00429723	0.0289905
																														Ly6c2	10.3755	0.516246	0.00432752	0.0291733
																														Rarres1	23.6803	0.529945	0.0043962	0.0295707
																														Ctbs	167.452	0.34068	0.00442649	0.0296979
																														Cenpo	96.6246	0.356659	0.00444319	0.0297772
																														9530082P21Rik	53.6125	0.454174	0.00453953	0.030356
																														Casp1	54.674	0.50758	0.00458806	0.0305798
																														Padi2	1271.55	0.396407	0.00463569	0.0308536
																														AK039090	30.4765	0.526991	0.0046424	0.0308856
																														Plvap	188.4	0.347316	0.00464759	0.030909
																														Neat1	377.051	0.415076	0.00474031	0.0313885
																														Srpk3	120.695	0.344687	0.00475431	0.0314584
																														Slc41a3	109.742	0.337938	0.00477797	0.0315535
																														Avil	15.395	0.507183	0.0047922	0.031606
																														Casp3	264.246	0.347127	0.00481636	0.031731
																														Sap30	127.741	0.338955	0.00491158	0.0321616
																														Tm6sf2	65.4614	0.390995	0.00496593	0.0324473
																														Tmpo	593.483	0.324843	0.00507188	0.033045
																														AK049914	50.4316	0.499699	0.00523894	0.0339736
																														2810403D21Rik	21.0681	0.505716	0.00536549	0.0345757
																														Alpk1	172.74	0.349814	0.00540956	0.0347616
																														Stc2	77.8937	0.444043	0.00542444	0.0348328
																														Vcam1	846.95	0.364418	0.0055173	0.0352709
																														Cdca7	71.081	0.393041	0.00554414	0.0354214
																														AK043332	37.7763	0.478895	0.00554519	0.0354214
																														Slc2a4	31.6984	0.505168	0.005644	0.035852
																														Gm10863	39.6917	0.475834	0.00566265	0.0359204
																														Tcn2	777.305	0.402236	0.00583671	0.0368328
																														Ptgr1	87.2621	0.438418	0.00585599	0.0368907
																														Kif24	31.6723	0.48493	0.00590331	0.0371376
																														Itga1	118.123	0.397028	0.00605327	0.0378723
																														Mgmt	29.6799	0.476075	0.00609619	0.0381111
																														Fam78a	105.385	0.411442	0.0061706	0.038396
																														Sdf2l1	213.747	0.336613	0.00619653	0.0384773
																														Ttc12	107.817	0.399995	0.00626269	0.0387972
																														Cd274	63.8923	0.415483	0.00632196	0.0390981
																														Cldn11	3448.02	0.438712	0.00652616	0.0400627
																														Erbb2ip	2170.9	0.334896	0.00652965	0.0400706
																														Mfsd7a	27.7471	0.474752	0.00668229	0.0406523
																														Notch3	261.076	0.344485	0.00671042	0.0407826
																														Fam129a	54.2187	0.463697	0.00672677	0.0408684
																														Shisa8	29.5103	0.484175	0.00673663	0.0409147
																														Mir684-1	12.4611	0.492156	0.0068229	0.0412877
																														Chek1	33.7561	0.46884	0.00682824	0.0413063
																														Plekhf2	179.734	0.379929	0.0068646	0.0414713
																														Trim65	68.1029	0.375607	0.00693522	0.0418225
																														Rfc3	125.35	0.342711	0.00701215	0.0421398
																														Smyd1	52.6725	0.415788	0.00707092	0.0424431
																														Zwilch	93.3398	0.445877	0.00710819	0.0426188
																														Scel	49.958	0.417635	0.00717944	0.0429333
																														Tdgf1	19.0285	0.490961	0.00719805	0.0430305
																														E230029C05Rik	44.5718	0.432898	0.00741795	0.0440998
																														Ppl	115.715	0.418986	0.00750782	0.044576
																														Nuak2	54.2494	0.457736	0.00753663	0.0446745
																														Mir6390	56.9721	0.389626	0.00767202	0.0453153
																														Catsper2	103.045	0.331188	0.00776872	0.0457386
																														AB347559	4.90504	0.429119	0.00779263	0.0458102
																														Sema3d	201.764	0.391325	0.00781479	0.0458767
																														AK207499	19.4096	0.495377	0.00782897	0.0459452
																														Tph2	40.0261	0.461236	0.00783436	0.0459621
																														Paqr6	274.263	0.370679	0.00784847	0.0460206
																														Ddx11	53.8812	0.461531	0.00791657	0.0463254
																														Net1	732.783	0.36067	0.00802004	0.046796
																														Ier3	81.2243	0.451396	0.00802904	0.0468335
																														Col3a1	109.741	0.496477	0.00838504	0.0485535
																														Ebi3	28.3869	0.472268	0.00842781	0.0487394
																														Tmem8c	15.6717	0.491514	0.00847	0.0488905
																														AU021092	65.7873	0.402609	0.00860678	0.0494934
																														Pf4	17.7723	0.485605	0.00863541	0.0496414
