# Supplementary material for: Transcriptomic Analysis of Mouse Brain After Traumatic Brain Injury Reveals That the Angiotensin Receptor Blocker Candesartan Acts Through Novel Pathways
Source: Front Neurosci. 2021 Mar 22;15:636259. doi: 10.3389/fnins.2021.636259 (PMC8019829; doi:10.3389/fnins.2021.636259)
Supplement: Supplementary file 2 [file Table_2.xlsx]

## Sheet: Table S2
Supplementary Table 2. Gene ontology biological process analysis of unique genes altered by candesartan treatment in the hippocampus of mice after sham injury at 3dpi.
Up or Down	Treatment	GO biological process	FDR
Up-regulated	Candesartan	No GO Families Identified
Down-regulated	Candesartan	Cilium Organization (GO:0044782)	2.8e-10
		Cilium Assembly (GO:0060271)	6.22e-08
		Axoneme Assembly (GO:0035082)	4.52e-08
		Cilium Movement (GO:0003341)	1.72e-07
		Microtubule Bundle Formation (GO:0001578)	3.16e-07
		Plasma Membrane Bounded Cell Projection Assembly (GO:0120031)	3.64e-07
		Cytoskeleton Organization (GO:0007010)	4.53e-07
		Movement of Cell or Subcellular Component (GO:0006928)	6.18e-07
		Cellular Component Organization (GO:0016043)	5.75e-07
		Cell Projection Assembly (GO:0030031)	5.35e-07
		Plasma Membrane Bounded Cell Projection Organization (GO:0120036)	6.33e-07
		Cellular Component Organization or Biogenesis (GO:0071840)	2.51e-06
		Cell Projection Organization (GO:0030030)	2.58e-06
		Cell Adhesion (GO:0007155)	7.13e-06
		Ion Transport (GO:0006811)	7.13e-06
		Biological Adhesion (GO:0022610)	8.49e-06
		Microtubule-Based Process (GO:0007017)	3.76e-05
		Localization (GO:0051179)	4.39e-05
		Anion transport (GO:0006820)	5.85e-05
		Organelle Assembly (GO:0070925)	6.05e-05
