# Supplementary material for: Transcriptomic Analysis of Mouse Brain After Traumatic Brain Injury Reveals That the Angiotensin Receptor Blocker Candesartan Acts Through Novel Pathways
Source: Front Neurosci. 2021 Mar 22;15:636259. doi: 10.3389/fnins.2021.636259 (PMC8019829; doi:10.3389/fnins.2021.636259)
Supplement: Supplementary file 3 [file Table_3.xlsx]

## Sheet: Sheet1
Supplementary Table 3. Gene ontology molecular function analysis of unique genes altered by candesartan treatmentin the hippocampus of mice after sham injury at 3 dpi.
Up or Down	Treatment	GO molecular function	FDR
Up-regulated	Candesartan	Voltage-gated cation channel activity (GO:0022843)	0.0007
		Voltage-gated channel activity (GO:0022832)	0.00154
		Voltage-gated ion channel activity (GO:0005244)	0.00103
		Gated channel activity (GO:0022836)	0.0102
		Cation channel activity (GO:0005261)	0.00854
		Ion channel activity (GO:0005216)	0.0236
		Metal ion transmembrane transporter activity (GO:0046873)	0.0214
		Passive transmembrane transporter activity (GO:0022803)	0.0272
		Channel activity (GO:0015267)	0.0242
		Voltage-gated potassium channel activity (GO:0005249)	0.029
Down-regulated	Candesartan	Protein binding (GO:0005515)	5.12e-07
		Nucleic acid binding (GO:0003676)	2.82e-06
		Olfactory receptor activity (GO:0004984)	3.34e-05
		Peptidase regulator activity (GO:0061134)	0.00185
		Heterocyclic compound binding (GO:1901363)	0.0036
		RNA binding (GO:0003723)	0.00407
		Binding (GO:0005488)	0.00499
		Organic cyclic compound binding (GO:0097159)	0.00644
		DNA binding (GO:0003677)	0.00703
		Transporter activity (GO:0005215)	0.00698
		Extracellular matrix structural constituent (GO:0005201)	0.0188
		Anion transmembrane transporter activity (GO:0008509)	0.0186
		Active transmembrane transporter activity (GO:0022804)	0.0197
		Transmembrane transporter activity (GO:0022857)	0.0208
		Endopeptidase inhibitor activity (GO:0004866)	0.0197
		Peptidase inhibitor activity (GO:0030414)	0.0241
		Endopeptidase regulator activity (GO:0061135)	0.0269
		Ion transmembrane transporter activity (GO:0015075)	0.0362
		Inorganic molecular entity transmembrane transporter activity (GO:0015318)	0.0358
		Enzyme regulator activity (GO:0030234)	0.0352
		Wnt-protein binding (GO:0017147)	0.0392
