# Supplementary material for: Transcriptomic Analysis of Mouse Brain After Traumatic Brain Injury Reveals That the Angiotensin Receptor Blocker Candesartan Acts Through Novel Pathways
Source: Front Neurosci. 2021 Mar 22;15:636259. doi: 10.3389/fnins.2021.636259 (PMC8019829; doi:10.3389/fnins.2021.636259)
Supplement: Supplementary file 4 [file Table_4.xlsx]

## Sheet: Hippocampus - UGA
Supplementary Table 4. Differentially expressed genes in the hippocampus after unique gene analysis at 3 and 29 dpi.
Hippocampus Unique Gene Analyis
3 Days Post Injury					29 Days Post Injury
TBI + VH		TBI + CD			TBI + VH		TBI + CD
Down-Regulated	Up-Regulated	Down-Regulated	Up-Regulated		Down-Regulated	Up-Regulated	Down-Regulated	Up-Regulated
Inha	Trp53inp2	Slc6a15	Rab5c		Tex40	Anxa5	Malat1	GU332589
Mas1	Taldo1	Calb1	Acss1		Rora	Trem2	Grin2b	Nfkbia
Cldn2	Hsd17b4	Hs6st2	Sorbs1			S100a4	AK078656	Crispld2
Aqp1	Scarb2	Cnih3	Cyp2j9			Capg		Esyt1
Kcne2	Adipor2	Gpc5	Icosl			C1qb		Ddit4
Slc4a5	Il6st	Usp29	Gm6548			C1qc		Tob2
Baiap2l1	Cnmd	Sh3bgrl2	Gm2a			Spp1
F5	Kazn	Acvr2a	Lrrc8a			Itgb2
Fam163a	Ethe1	Nol4	Ilk			Cd44
Eps8l2	Wipi1	Peg3	Pla2g15			Lilrb4
Abca4	Lbh	Kcnj4	Dnm2			Myo1f
Slc44a5	Slc25a18	Slc4a10	Rpl41			Abca1
Phactr2	Nme2	Ralgapa2	PLPP3			Csf1r
Ttr	Tpt1	Asxl3	Slc35b2			Cybrd1
Trpv4	Mtmr10	Lingo2	Pabpc1			C3ar1
Igf2	Tinf2	Map3k5	Atp13a4			Ptprc
Folr1	Rps4x	Il1rapl1	Gstm1			Unc93b1
Vegfa	Arpin	Pcp4	Cln3			Aspg
Acacb	Gal3st1	Cdh12	Atp6v0a2			Hexb
Actn2	Tmbim1	Cacna2d2	Myh9			Gfap
St6galnac2	Matn4	Rsph4a	Cyb5a			Cd84
Steap1	Cyp4f16	Amer1	Gstk1			H2-K1
Rab11fip1	Ankrd13a	Hecw1	Gabarap			Cyba
L3mbtl3	Kcnk13	Arhgap20	Myo10			Csf3r
Ace	Tmem229a	Slc12a2	Pdia4			Slc14a1
Prdm16os	Nln	Lgi2	Rftn2			Msn
Prr32	Fut10	Chrna4	Pttg1ip			Ctsh
Tspan33	Rb1	Rd3	Papss2			AF251705
Clic6	Mif4gd	Cpne5	Phka1			Adgre1
Krt8	Fdxr	Slc9a7	Eci2			Ctsz
Mpp7	2410006H16Rik	Gucy2g	Igdcc4			Nckap1l
Adgra2	Cfhr2	Cfap206	Rpl29			Serpina3n
Cldn1	Cryab	Cdkl5	Pald1			Cd52
Wdr86	Dbp	Plppr1	Pik3ip1			Kcne1l
Fbn1	Txndc12	Fat4	Lrp4			Tlr2
Mroh7	Carhsp1	Cfap74	Serpine2			Anxa2
Rassf8	Adamtsl5	Ppargc1b	Cdk4			Gbp2
Spint2	Aldh1a1	Cfap43	Mindy1			Hvcn1
Tspan18	Tmem268	Kcnf1	Thrsp			Cyr61
Cgnl1	Calu	A230001M10Rik	Isg15			Tlr7
Cdon	Grm3	Ar	1700017B05Rik			Tnfrsf1b
Lhx9	Gng12	Zic3	Pfkfb4			Aldh1l2
Cox8b	Mboat1	Dock5	Flna			Emp1
Lmx1a	Ppp1r14a	Rsph1	Traf4			Fcgr3
Kcnh1	Cacng5	Ppil6	Ndrg2			Slc15a3
Stra6	Lama2	Dbpht2	Rtp4			Entpd2
Otx2	Gli2	Tenm1	Tmem47			Cmklr1
Ooep	Gjb1	Pip5k1b	Myh15			Ptpn6
Cavin2	Plxnd1	Pla2g4e	Vcl			Ncf1
Exph5	Rell1	Grm2	Ddx58			Pros1
Drc7	Sox10	Plcxd1	Usp18			Pdlim4
Lepr	Snx8	Lrrtm4	Csf2rb2			Gem
Slc31a1	Ly6g6e	Smim5	Npepl1			Tnfrsf1a
Slc19a1	Ugt8a	Cyp4x1	Tspan14			Cxcl16
Csrp2	Cntf	Tmem74	Vat1			Clic1
Arhgef5	Cyp39a1	Pcdhga4	Lmo2			Dock2
Fndc1	Ermard	Nek10	Galnt10
Atp7a	Chadl	1700086L19Rik	Pfn1
Dydc2	Irak3	Ubxn10	Tmod3
Gnmt	Slc45a3	Kctd16	Pola2
Angptl2	Plxnb3	Tiam1	Arhgap31
Stk32b	A930003O13Rik	Pld5	1810058I24Rik
Pih1d2	Fadd	Spag6	Sirt2
Dmpk	Acat3	Cfap53	Tmem104
Col8a2	Pcdhb5	Tunar	Mrc1
Mrap2	Cldn19	F730043M19Rik	Trim34a
Sgms2	Il33	Kcna4	Ugdh
Slc22a8	Rgs6	Cntnap5b	Gng10
Pla2g5	Cks2	Dusp4	Bmpr1b
Slc13a4	Polh	Ak8	Maf
Sema3b	Met	Dgkh	Tsc22d3
Slc16a9	Plekhg1	Upp2	Fmo5
Foxq1	Ecel1	Trpc6	Rps26
Cdh9	9330188P03Rik	Gabrd	Pdlim5
Abhd2	Pamr1	Spag16	Orai1
Tcea3	Ap5b1	Pls1	Rhbdf2
Acad8	Plpp4	Gm3764	Abtb2
Cdc14b	Sox9	Tmem232	Plgrkt
Ppp1r1b	Cdh19	Pcsk1	Sp100
Six5	Tmem243	Ankrd63	Il2rg
Tekt1	Cntd1	6820431F20Rik	Creg1
Fzd4	Prr5l	Sema3f	Nedd9
Baiap3	Tesk2	Chst9	Plscr4
Col18a1	Tppp3	Mlf1	H2bc6
Pms2	Ptn	Cfap61	Mdk
Col14a1	Casp12	Chst15	Maff
Gm20501	Clic4	Grm8	Card19
Iqub	Sspo	Jph1	Arap3
Dock6	Rom1	Ctxn3	Trim12a
Prelp	Pin4	Cntn5	Gnpda1
Paqr5	Pcdhgb5	Tmem117	Dhrs4
Clec18a	Plp2	Npr1	F13a1
Zfp811	Pmaip1	Ttll6	Ost4
Lhb	Tha1	Lrrc23	Nkiras2
Hspg2	Echdc3	Clcn1	Fbln5
Slc4a2	Mybl1	Htr1d	Gdpd2
Col9a3	St8sia2	Zdbf2	Nras
Adcy4	Ier5l	Rfx3	Hopx
Slc38a11	Brinp3	Cfap70	Tnfsf12
Aph1c	Ccdc163	Mfsd4b4	OTULINL
Ttc39a	Stat5a	Armc3	Reep4
Acaa2	AK043219	Ccdc146	B4galt1
Adgrf4		Ryr1	Slc7a5
Fgd5		Ccp110	Pdk4
Mok		1500015L24Rik	Ifi35
Nup62cl		Cyp4f15	Tbx6
Rd3l		Gucy2e	Ifih1
Zap70		Postn	Ly6a
Car14		Hydin	Fcgrt
Zfp57		Cngb1	Cenpj
Lbp		Wdr63	Pcna
Mecom		2310015A10Rik	Ly6c1
Nid2		Klhl4	Crip1
Hemk1		Foxp2	Arhgef19
Ranbp3l		Kcng1	Slc4a4
Kif9		Dsp	Adrb2
Pltp		Nt5e	Cmtm5
A530058N18Rik		Drd2	Glmp
Chia1		Cdh18	Zfas1
Nhlh2		Ccdc180	AFG1L
Slc16a2		Tmem163	Plxnb2
Slc37a1		Zmynd10	Poc1b
Cish		Cobll1	Asah1
Flvcr2		Baiap2l2	Vstm4
Calb2		C030029H02Rik	C1ra
Gas2l2		Cfap52	Bmp1
Bmp6		Dnah2	Ppic
Smim18		Adgrd1	Dctpp1
Slco2a1		Prox1	H2-T24
Dhrs11		Tsnaxip1	Samhd1
Ppfibp2		Ccdc170	Cacna2d4
Cd59a		B230307C23Rik	Pglyrp1
Krt2		Ror1	Acer2
Impa2		Lhx1os	Parp10
Ccbe1		Yod1	Slfn5
Myof		Ccdc81	Mavs
AK013627		Slc26a10	Slc2a10
BC023483		Cfap157	Nmi
AK079777		Cfap161	Klf15
		Gpr150	Nsa2
		4833427G06Rik	Hmcn2
		Rpl9	Map3k8
		1700013F07Rik	Arhgef4
		Abca8a	Pxmp2
		Ttll9	Dusp27
		Xkr4	Ephx2
		Mc3r	Nes
		Lipt1	Cmbl
		Lrrc18	Hmgcs2
		AK140725	Crispld2
		AK141794	Nsmce1
		AK053225	Oplah
			Ednra
			Gm3219
			SVBP
			C1ql1
			Slc46a1
			Lamp2
			Chaf1a
			Oas1b
			Ddit4
			Adhfe1
			Lig1
			Map4k1
			Etnppl
			Prim2
			Pik3r6
			Stag3
			Mertk
			Crot
			Bmp4
			Slc1a5
			Fhod1
			Trim21
			Bst2
			Adam8
			Herc6
			Isg20
			CENPX
			Rrp8
			Cyb561a3
			Fhl3
			Dysf
			StARD9
			Fn1
			Dok3
			Klf2
			Rnls
			Loxl1
			Srarp
			Slc40a1
			Txlnb
			Amotl1
			Tubb2a-ps2
			Mmp2
			Vwf
			Cenpk
			Arrdc1
			Proca1
			Prr5
			Sox4
			Slc38a3
			Nudt1
			Traf5
			Erap1
			Blvrb
			Lonrf3
			Ano7
			Timeless
			Casp6
			Cd93
			Nek3
			Slc39a8
			Sgk1
			Hist2h3c1
			Thbs1
			Rbm38
			F11r
			Col12a1
			Ncapg2
			Cideb
			Nat8f4
			Eva1a
			Grrp1
			Tor3a
			Dnase1l1
			Tnfsf13b
			ACTG1
			Sh2b2
			Angptl4
			Faap24
			Ly6c2
			Rarres1
			Ctbs
			Cenpo
			9530082P21Rik
			Gm16499
			Plvap
			Slc41a3
			Avil
			Casp3
			Tm6sf2
			Tmpo
			2810403D21Rik
			Alpk1
			Vcam1
			Cdca7
			Tcn2
			Ptgr1
			Kif24
			Itga1
			Fam78a
			Sdf2l1
			Cd274
			Notch3
			Fam129a
			Mir684-1
			Chek1
			Trim65
			Rfc3
			Smyd1
			Zwilch
			Scel
			E230029C05Rik
			Ppl
			Nuak2
			Mir6390
			Catsper2
			cpe
			Paqr6
			Ddx11
			Net1
			Ier3
			Col3a1
			Tmem8c
			AU021092
			Pf4
			AK039110
			AB347592
			AK080484
			AK081274
