# Supplementary material for: Transcriptomic Analysis of Mouse Brain After Traumatic Brain Injury Reveals That the Angiotensin Receptor Blocker Candesartan Acts Through Novel Pathways
Source: Front Neurosci. 2021 Mar 22;15:636259. doi: 10.3389/fnins.2021.636259 (PMC8019829; doi:10.3389/fnins.2021.636259)
Supplement: Supplementary file 5 [file Table_5.xlsx]

## Sheet: Sheet1
Supplementary Table 5. Pathway Analysis of ReactomeFIViz-Derived Clustered Functional Modules. Pathway analysis of 15 functional modules identified from the unique up-regulated DEGs altered by candesartan treatment after TBI at 3 dpi in the hippocampus.
Module	GeneSet	RatioOfProteinsInGeneSet	NumberOfProteinsInGeneSet	ProteinsFromModule	P-value	FDR	Nodes
0	DNA replication(K)	0.0031	36	5	3.387e-10	1.1527e-08	PRIM2,RFC3,PCNA,LIG1,POLA2
0	Telomere Maintenance(R)	0.0032	38	5	4.4333e-10	1.1527e-08	PRIM2,RFC3,PCNA,LIG1,POLA2
0	Synthesis of DNA(R)	0.0099	117	5	1.1728e-07	1.9937e-06	PRIM2,RFC3,PCNA,LIG1,POLA2
0	S Phase(R)	0.0133	156	5	4.8331e-07	6.283e-06	PRIM2,RFC3,PCNA,LIG1,POLA2
0	Mismatch repair(K)	0.002	23	3	2.1073e-06	2.1073e-05	RFC3,PCNA,LIG1
0	Resolution of Abasic Sites (AP sites)(R)	0.0026	31	3	5.1336e-06	4.1069e-05	RFC3,PCNA,LIG1
0	ATR signaling pathway(N)	0.0031	37	3	8.6951e-06	6.0866e-05	RFC3,CHEK1,TIMELESS
0	DNA Damage Bypass(R)	0.0037	44	3	1.4558e-05	8.7345e-05	RFC3,PCNA,ISG15
0	Nucleotide excision repair(K)	0.004	47	3	1.7709e-05	8.8545e-05	RFC3,PCNA,LIG1
0	HDR through Homologous Recombination (HRR) or Single Strand Annealing (SSA)(R)	0.0072	85	3	0.00010224	0.00050271	RFC3,CHEK1,TIMELESS
0	Mismatch Repair(R)	0.0013	15	2	0.00012568	0.00050271	PCNA,LIG1
0	Circadian rhythm pathway(N)	0.0014	16	2	0.0001429	0.00057161	CHEK1,TIMELESS
0	Nucleotide Excision Repair(R)	0.0087	102	3	0.00017476	0.00069904	RFC3,PCNA,LIG1
0	Mitotic G1 phase and G1/S transition(R)	0.0114	134	3	0.00038821	0.0011646	PRIM2,PCNA,POLA2
0	Base excision repair(K)	0.0028	33	2	0.00060149	0.0018045	PCNA,LIG1
0	Fanconi anemia pathway(N)	0.0038	45	2	0.0011101	0.0033304	RFC3,CHEK1
0	Interferon alpha/beta signaling(R)	0.0058	68	2	0.0024989	0.0049978	ISG15,USP18
0	ISG15 antiviral mechanism(R)	0.0058	68	2	0.0024989	0.0049978	ISG15,USP18
0	DNA Replication Pre-Initiation(R)	0.0072	85	2	0.0038634	0.0077268	PRIM2,POLA2
0	Cell cycle(K)	0.0105	124	2	0.0080247	0.016	PCNA,CHEK1
0	btg family proteins and cell cycle regulation(B)	0.0008	9	1	0.0099017	0.0198	CHAF1A
0	DNA replication(P)	0.0009	10	1	0.011	0.022	PCNA
0	p53 signaling pathway(B)	0.001	12	1	0.0132	0.0264	PCNA
0	control of gene expression by vitamin d receptor(B)	0.0014	16	1	0.0175	0.0316	CHAF1A
0	Interconversion of nucleotide di- and triphosphates(R)	0.0017	20	1	0.0219	0.0316	DCTPP1
0	Cell Cycle Checkpoints(R)	0.0209	246	2	0.0293	0.0316	RFC3,CHEK1
0	BARD1 signaling events(N)	0.0025	29	1	0.0316	0.0316	PCNA
0	Signaling by SCF-KIT(R)	0.0035	41	1	0.0444	0.0444	CHEK1
0	il-2 receptor beta chain in t cell activation(B)	0.0037	44	1	0.0476	0.0476	PCNA
1	Extracellular matrix organization(R)	0.0223	262	7	1.9532e-09	1.8234e-07	COL3A1,VCAM1,MMP2,COL12A1,ITGA1,FN1,THBS1
1	Beta1 integrin cell surface interactions(N)	0.0056	66	5	4.2638e-09	1.8234e-07	COL3A1,VCAM1,ITGA1,FN1,THBS1
1	Integrin signalling pathway(P)	0.0134	158	6	5.0649e-09	1.8234e-07	COL3A1,COL12A1,ITGA1,FN1,FLNA,VCL
1	Focal adhesion(K)	0.0169	199	6	1.9855e-08	5.3608e-07	VWF,ITGA1,FN1,FLNA,THBS1,VCL
1	Response to elevated platelet cytosolic Ca2+(R)	0.0097	114	5	6.4004e-08	1.4081e-06	VWF,FN1,FLNA,THBS1,VCL
1	ECM-receptor interaction(K)	0.0075	88	4	1.4783e-06	2.661e-05	VWF,ITGA1,FN1,THBS1
1	AGE-RAGE signaling pathway in diabetic complications(K)	0.0085	100	4	2.449e-06	3.6735e-05	COL3A1,VCAM1,MMP2,FN1
1	Alpha4 beta1 integrin signaling events(N)	0.0028	33	3	4.7675e-06	6.1978e-05	VCAM1,FN1,THBS1
1	Smooth Muscle Contraction(R)	0.0032	38	3	7.2586e-06	8.7103e-05	ITGA1,SORBS1,VCL
1	Proteoglycans in cancer(K)	0.0173	204	4	4.0064e-05	0.00044071	MMP2,FN1,FLNA,THBS1
1	GP1b-IX-V activation signalling(R)	0.0009	10	2	4.7437e-05	0.00047437	VWF,FLNA
1	Platelet Adhesion to exposed collagen(R)	0.0011	13	2	8.0033e-05	0.0007203	VWF,ITGA1
1	Amoebiasis(K)	0.0087	102	3	0.00013531	0.00095586	COL3A1,FN1,VCL
1	Beta5 beta6 beta7 and beta8 integrin cell surface interactions(N)	0.0014	17	2	0.00013655	0.00095586	VCAM1,FN1
1	Interleukin-4 and Interleukin-13 signaling(R)	0.0094	111	3	0.00017348	0.0010686	VCAM1,MMP2,FN1
1	Leukocyte transendothelial migration(K)	0.0095	112	3	0.0001781	0.0010686	VCAM1,MMP2,VCL
1	Human papillomavirus infection(K)	0.0281	330	4	0.00025594	0.0014699	VWF,ITGA1,FN1,THBS1
1	VEGFR3 signaling in lymphatic endothelium(N)	0.0021	25	2	0.00029397	0.0014699	ITGA1,FN1
1	Alpha9 beta1 integrin signaling events(N)	0.0021	25	2	0.00029397	0.0014699	VCAM1,FN1
1	PI3K-Akt signaling pathway(K)	0.0301	354	4	0.00033445	0.0016722	VWF,ITGA1,FN1,THBS1
1	Integrin signaling(R)	0.0023	27	2	0.0003425	0.0017125	VWF,FN1
1	Syndecan-2-mediated signaling events(N)	0.0027	32	2	0.00047974	0.001919	MMP2,FN1
1	Syndecan-4-mediated signaling events(N)	0.0027	32	2	0.00047974	0.001919	FN1,THBS1
1	Platelet Aggregation (Plug Formation)(R)	0.0031	37	2	0.00063956	0.0025582	VWF,FN1
1	Bladder cancer(K)	0.0035	41	2	0.00078353	0.0030784	MMP2,THBS1
1	Beta3 integrin cell surface interactions(N)	0.0037	43	2	0.00086087	0.0030784	FN1,THBS1
1	Insulin Pathway(N)	0.0038	45	2	0.00094174	0.0030784	SORBS1,SH2B2
1	Integrins in angiogenesis(N)	0.004	47	2	0.0010261	0.0030784	FN1,VCL
1	Regulation of actin cytoskeleton(K)	0.0181	213	3	0.0011558	0.0034673	ITGA1,FN1,VCL
1	Malaria(K)	0.0043	50	2	0.0011594	0.0034781	VCAM1,THBS1
1	Angiopoietin receptor Tie2-mediated signaling(N)	0.0043	50	2	0.0011594	0.0034781	MMP2,FN1
1	Adherens junction(K)	0.006	71	2	0.0023101	0.0069302	SORBS1,VCL
1	Bacterial invasion of epithelial cells(K)	0.0062	73	2	0.0024393	0.0073179	FN1,VCL
1	inhibition of matrix metalloproteinases(B)	0.0003	4	1	0.0040733	0.0122	MMP2
1	Protein digestion and absorption(K)	0.0081	95	2	0.0040799	0.0122	COL3A1,COL12A1
1	Regulation of Insulin-like Growth Factor (IGF) transport and uptake by Insulin-like Growth Factor Binding Proteins (IGFBPs)(R)	0.0102	120	2	0.0064183	0.0137	MMP2,FN1
1	Platelet activation(K)	0.0105	124	2	0.0068378	0.0137	COL3A1,VWF
1	Relaxin signaling pathway(K)	0.011	129	2	0.0073794	0.0148	COL3A1,MMP2
1	a4b7 Integrin signaling(N)	0.0007	8	1	0.0081314	0.0163	VCAM1
1	Insulin signaling pathway(K)	0.0116	137	2	0.0082855	0.0166	SORBS1,SH2B2
1	Fluid shear stress and atherosclerosis(K)	0.0118	139	2	0.0085195	0.017	VCAM1,MMP2
1	OAS antiviral response(R)	0.0008	9	1	0.0091436	0.0183	FLNA
1	Cellular roles of Anthrax toxin(N)	0.0016	19	1	0.0192	0.0384	VCAM1
1	Signaling events mediated by PRL(N)	0.002	23	1	0.0232	0.042	ITGA1
1	Beta2 integrin cell surface interactions(N)	0.0025	29	1	0.0292	0.042	VCAM1
1	Osteopontin-mediated events(N)	0.0025	29	1	0.0292	0.042	MMP2
1	amb2 Integrin signaling(N)	0.0026	31	1	0.0312	0.042	MMP2
1	Noncanonical Wnt signaling pathway(N)	0.0027	32	1	0.0322	0.042	FLNA
1	Signaling events mediated by TCPTP(N)	0.003	35	1	0.0351	0.042	ITGA1
1	African trypanosomiasis(K)	0.0031	37	1	0.0371	0.042	VCAM1
1	Validated transcriptional targets of AP1 family members Fra1 and Fra2(N)	0.0031	37	1	0.0371	0.042	MMP2
1	Formation of Fibrin Clot (Clotting Cascade)(R)	0.0033	39	1	0.0391	0.042	VWF
1	FOXM1 transcription factor network(N)	0.0035	41	1	0.041	0.042	MMP2
1	Signaling by SCF-KIT(R)	0.0035	41	1	0.041	0.042	SH2B2
1	Plasma membrane estrogen receptor signaling(N)	0.0036	42	1	0.042	0.042	MMP2
1	Stabilization and expansion of the E-cadherin adherens junction(N)	0.0036	42	1	0.042	0.042	VCL
1	Urokinase-type plasminogen activator (uPA) and uPAR-mediated signaling(N)	0.0036	42	1	0.042	0.042	FN1
1	p53 pathway(P)	0.0037	44	1	0.044	0.044	THBS1
1	RhoA signaling pathway(N)	0.0038	45	1	0.045	0.045	VCL
2	Salmonella infection(K)	0.0182	214	6	9.8425e-10	1.1024e-07	FHOD1,CASP3,MYH15,MYH9,PFN1,ACTG1
2	Pathogenic Escherichia coli infection(K)	0.0172	202	5	8.0125e-08	4.487e-06	MYO10,CASP3,MYH15,MYH9,ACTG1
2	west nile virus(B)	0.0005	6	2	7.2713e-06	0.00026904	CASP6,CASP3
2	apoptotic signaling in response to dna damage(B)	0.0012	14	2	3.9481e-05	0.00099675	CASP6,CASP3
2	regulation of cell cycle progression by plk3(B)	0.0013	15	2	4.5307e-05	0.00099675	CASP6,CASP3
2	internal ribosome entry pathway(B)	0.0015	18	2	6.5175e-05	0.0010634	CASP6,CASP3
2	Apoptosis(K)	0.0116	136	3	8.2884e-05	0.0010634	CASP6,CASP3,ACTG1
2	induction of apoptosis through dr3 and dr4/5 death receptors(B)	0.0018	21	2	8.862e-05	0.0010634	CASP6,CASP3
2	caspase cascade in apoptosis(B)	0.0018	21	2	8.862e-05	0.0010634	CASP6,CASP3
2	Nicotinic acetylcholine receptor signaling pathway(P)	0.0019	22	2	9.7228e-05	0.0010695	MYH9,ACTG1
2	Tight junction(K)	0.0144	169	3	0.00015737	0.0015256	MYH15,MYH9,ACTG1
2	hiv-1 nef: negative effector of fas and tnf(B)	0.0026	30	2	0.0001803	0.0015256	CASP6,CASP3
2	trefoil factors initiate mucosal healing(B)	0.0026	31	2	0.00019246	0.0015256	CASP6,CASP3
2	HIV-1 Nef: Negative effector of Fas and TNF-alpha(N)	0.0028	33	2	0.00021795	0.0015256	CASP6,CASP3
2	FAS signaling pathway(P)	0.0028	33	2	0.00021795	0.0015256	CASP6,CASP3
2	Regulation of actin cytoskeleton(K)	0.0181	213	3	0.00031063	0.0021744	MYH9,PFN1,ACTG1
2	Apoptotic execution phase(R)	0.004	47	2	0.00043999	0.00264	CASP6,CASP3
2	Caspase cascade in apoptosis(N)	0.0044	52	2	0.00053767	0.003226	CASP6,CASP3
2	Viral myocarditis(K)	0.0051	60	2	0.00071389	0.0035694	CASP3,ACTG1
2	p75(NTR)-mediated signaling(N)	0.0059	69	2	0.00094123	0.0047061	CASP6,CASP3
2	EPH-Ephrin signaling(R)	0.0073	86	2	0.0014537	0.0072686	MYH9,ACTG1
2	Huntington disease(P)	0.0103	121	2	0.0028436	0.0142	CASP3,ACTG1
2	d4gdi signaling pathway(B)	0.0005	6	1	0.0040737	0.0163	CASP3
2	Fcgamma receptor (FCGR) dependent phagocytosis(R)	0.0136	160	2	0.0049064	0.0196	MYO10,ACTG1
2	tsp-1 induced apoptosis in microvascular endothelial cell(B)	0.0007	8	1	0.0054283	0.0217	CASP3
2	Caspase activation via Dependence Receptors in the absence of ligand(R)	0.0007	8	1	0.0054283	0.0217	CASP3
2	Influenza A(K)	0.0145	170	2	0.00552	0.0221	CASP3,ACTG1
2	Proteoglycans in cancer(K)	0.0173	204	2	0.0078571	0.0244	CASP3,ACTG1
2	granzyme a mediated apoptosis pathway(B)	0.001	12	1	0.0081328	0.0244	CASP3
2	Rap1 signaling pathway(K)	0.0179	210	2	0.008309	0.0249	PFN1,ACTG1
2	b cell survival pathway(B)	0.0011	13	1	0.0088079	0.0264	CASP3
2	stress induction of hsp regulation(B)	0.0012	14	1	0.0094826	0.0284	CASP3
2	Shigellosis(K)	0.0201	236	2	0.0104	0.0312	PFN1,ACTG1
2	tnfr1 signaling pathway(B)	0.0014	17	1	0.0115	0.0345	CASP3
2	fas signaling pathway (cd95)(B)	0.0016	19	1	0.0129	0.0386	CASP3
2	Signaling by Hippo(R)	0.0017	20	1	0.0135	0.0404	CASP3
2	Other interleukin signaling(R)	0.002	23	1	0.0155	0.0404	CASP3
2	erk and pi-3 kinase are necessary for collagen binding in corneal epithelia(B)	0.0026	30	1	0.0202	0.0404	PFN1
2	Syndecan-2-mediated signaling events(N)	0.0027	32	1	0.0216	0.0431	CASP3
2	FAS (CD95) signaling pathway(N)	0.0027	32	1	0.0216	0.0431	CASP3
2	rho cell motility signaling pathway(B)	0.0027	32	1	0.0216	0.0431	PFN1
2	Apoptosis - multiple species(K)	0.0027	32	1	0.0216	0.0431	CASP3
2	Netrin-mediated signaling events(N)	0.0027	32	1	0.0216	0.0431	MYO10
2	Signaling by Rho GTPases(R)	0.0295	347	2	0.0216	0.0433	MYH9,ACTG1
2	Calcineurin-regulated NFAT-dependent transcription in lymphocytes(N)	0.0039	46	1	0.0309	0.0473	CASP3
2	Posttranslational regulation of adherens junction stability and dissassembly(N)	0.0041	48	1	0.0322	0.0473	CASP3
2	Netrin-1 signaling(R)	0.0042	49	1	0.0328	0.0473	MYO10
2	Vibrio cholerae infection(K)	0.0043	50	1	0.0335	0.0473	ACTG1
2	Intrinsic Pathway for Apoptosis(R)	0.0043	51	1	0.0342	0.0473	CASP3
2	Translocation of SLC2A4 (GLUT4) to the plasma membrane(R)	0.0043	51	1	0.0342	0.0473	MYH9
2	Role of Calcineurin-dependent NFAT signaling in lymphocytes(N)	0.0044	52	1	0.0348	0.0473	CASP3
2	Legionellosis(K)	0.0048	57	1	0.0381	0.0473	CASP3
2	Amyotrophic lateral sclerosis (ALS)(K)	0.0048	57	1	0.0381	0.0473	CASP3
2	LPA receptor mediated events(N)	0.0054	63	1	0.0421	0.0473	CASP3
2	Semaphorin interactions(R)	0.0054	63	1	0.0421	0.0473	MYH9
2	Epithelial cell signaling in Helicobacter pylori infection(K)	0.006	70	1	0.0466	0.0473	CASP3
2	Adherens junction(K)	0.006	71	1	0.0473	0.0473	ACTG1
2	p53 signaling pathway(K)	0.0061	72	1	0.0479	0.0479	CASP3
2	Bacterial invasion of epithelial cells(K)	0.0062	73	1	0.0486	0.0486	ACTG1
2	Platinum drug resistance(K)	0.0062	73	1	0.0486	0.0486	CASP3
3	Extracellular matrix organization(R)	0.0223	262	4	1.6039e-05	0.0031348	BMP4,BMP1,LOXL1,FBLN5
3	phospholipase c-epsilon pathway(B)	0.001	12	2	2.9026e-05	0.0031348	CDK4,ADRB2
3	cystic fibrosis transmembrane conductance regulator (cftr) and beta 2 adrenergic receptor (b2ar) pathway(B)	0.0016	19	2	7.2593e-05	0.0048723	CDK4,ADRB2
3	corticosteroids and cardioprotection(B)	0.002	24	2	0.00011563	0.0048723	CDK4,ADRB2
3	alk in cardiac myocytes(B)	0.002	24	2	0.00011563	0.0048723	BMP4,CDK4
3	activation of camp-dependent protein kinase pka(B)	0.0022	26	2	0.00013561	0.0048723	CDK4,ADRB2
3	role of ÃŸ-arrestins in the activation and targeting of map kinases(B)	0.0024	28	2	0.00015717	0.0048723	CDK4,ADRB2
3	roles of ÃŸ arrestin dependent recruitment of src kinases in gpcr signaling(B)	0.0027	32	2	0.00020501	0.0054413	CDK4,ADRB2
3	Arf6 trafficking events(N)	0.0029	34	2	0.00023128	0.0054413	ADRB2,DNM2
3	chrebp regulation by carbohydrates and camp(B)	0.0031	36	2	0.00025911	0.0054413	CDK4,ADRB2
3	BMP receptor signaling(N)	0.0035	41	2	0.00033551	0.0063352	BMP4,BMPR1B
3	activation of csk by camp-dependent protein kinase inhibits signaling through the t cell receptor(B)	0.0036	42	2	0.00035196	0.0063352	CDK4,ADRB2
3	TGF-beta signaling pathway(P)	0.0068	80	2	0.0012605	0.0175	BMP4,BMPR1B
3	TGF-beta signaling pathway(K)	0.008	94	2	0.001732	0.0175	BMP4,BMPR1B
3	ionomycin and phorbal ester signaling pathway(B)	0.0003	3	1	0.0020386	0.0175	CDK4
3	phospholipase c signaling pathway(B)	0.0003	4	1	0.0027174	0.0175	CDK4
3	fosb gene expression and drug abuse(B)	0.0003	4	1	0.0027174	0.0175	CDK4
3	Clathrin-mediated endocytosis(R)	0.0105	124	2	0.0029833	0.0175	ADRB2,DNM2
3	cyclin e destruction pathway(B)	0.0004	5	1	0.0033957	0.0175	CDK4
3	Fluid shear stress and atherosclerosis(K)	0.0118	139	2	0.0037296	0.0175	BMP4,BMPR1B
3	Signaling pathways regulating pluripotency of stem cells(K)	0.0119	140	2	0.0037822	0.0175	BMP4,BMPR1B
3	cdc25 and chk1 regulatory pathway in response to dna damage(B)	0.0005	6	1	0.0040737	0.0175	CDK4
3	e2f1 destruction pathway(B)	0.0005	6	1	0.0040737	0.0175	CDK4
3	regulation of p27 phosphorylation during cell cycle progression(B)	0.0005	6	1	0.0040737	0.0175	CDK4
3	Hippo signaling pathway(K)	0.0131	154	2	0.0045547	0.0175	BMP4,BMPR1B
3	deregulation of cdk5 in alzheimers disease(B)	0.0006	7	1	0.0047512	0.0175	CDK4
3	sonic hedgehog receptor ptc1 regulates cell cycle(B)	0.0007	8	1	0.0054283	0.0175	CDK4
3	tsp-1 induced apoptosis in microvascular endothelial cell(B)	0.0007	8	1	0.0054283	0.0175	CDK4
3	sodd/tnfr1 signaling pathway(B)	0.0008	9	1	0.006105	0.0175	CDK4
3	regulation of splicing through sam68(B)	0.0008	9	1	0.006105	0.0175	CDK4
3	tnfr2 signaling pathway(B)	0.0008	9	1	0.006105	0.0175	CDK4
3	rho-selective guanine exchange factor akap13 mediates stress fiber formation(B)	0.0009	10	1	0.0067814	0.0175	CDK4
3	protein kinase a at the centrosome(B)	0.0009	11	1	0.0074573	0.0175	CDK4
3	rb tumor suppressor/checkpoint signaling in response to dna damage(B)	0.0009	11	1	0.0074573	0.0175	CDK4
3	repression of pain sensation by the transcriptional regulator dream(B)	0.001	12	1	0.0081328	0.0175	CDK4
3	attenuation of gpcr signaling(B)	0.001	12	1	0.0081328	0.0175	CDK4
3	estrogen responsive protein efp controls cell cycle and breast tumors growth(B)	0.001	12	1	0.0081328	0.0175	CDK4
3	regulation of eif2(B)	0.001	12	1	0.0081328	0.0175	CDK4
3	akap95 role in mitosis and chromosome dynamics(B)	0.001	12	1	0.0081328	0.0175	CDK4
3	trka receptor signaling pathway(B)	0.001	12	1	0.0081328	0.0175	CDK4
3	p53 signaling pathway(B)	0.001	12	1	0.0081328	0.0175	CDK4
3	human cytomegalovirus and map kinase pathways(B)	0.0011	13	1	0.0088079	0.0175	CDK4
3	il12 and stat4 dependent signaling pathway in th1 development(B)	0.0011	13	1	0.0088079	0.0175	CDK4
3	transcription regulation by methyltransferase of carm1(B)	0.0011	13	1	0.0088079	0.0175	CDK4
3	b cell survival pathway(B)	0.0011	13	1	0.0088079	0.0175	CDK4
3	phosphorylation of mek1 by cdk5/p35 down regulates the map kinase pathway(B)	0.0011	13	1	0.0088079	0.0175	CDK4
3	Metabolism of nitric oxide: eNOS activation and regulation(R)	0.0012	14	1	0.0094826	0.0175	DNM2
3	apoptotic signaling in response to dna damage(B)	0.0012	14	1	0.0094826	0.0175	CDK4
3	il 4 signaling pathway(B)	0.0012	14	1	0.0094826	0.0175	CDK4
3	the 41bb-dependent immune response(B)	0.0012	14	1	0.0094826	0.0175	CDK4
3	telomeres telomerase cellular aging and immortality(B)	0.0013	15	1	0.0102	0.0175	CDK4
3	aspirin blocks signaling pathway involved in platelet activation(B)	0.0013	15	1	0.0102	0.0175	CDK4
3	atm signaling pathway(B)	0.0013	15	1	0.0102	0.0175	CDK4
3	calcium signaling by hbx of hepatitis b virus(B)	0.0013	15	1	0.0102	0.0175	CDK4
3	regulation of cell cycle progression by plk3(B)	0.0013	15	1	0.0102	0.0175	CDK4
3	bone remodeling(B)	0.0014	16	1	0.0108	0.0175	CDK4
3	akt signaling pathway(B)	0.0014	16	1	0.0108	0.0175	CDK4
3	the igf-1 receptor and longevity(B)	0.0014	16	1	0.0108	0.0175	CDK4
3	nerve growth factor pathway (ngf)(B)	0.0014	16	1	0.0108	0.0175	CDK4
3	role of nicotinic acetylcholine receptors in the regulation of apoptosis(B)	0.0014	16	1	0.0108	0.0175	CDK4
3	role of mal in rho-mediated activation of srf(B)	0.0014	16	1	0.0108	0.0175	CDK4
3	control of skeletal myogenesis by hdac and calcium/calmodulin-dependent kinase (camk)(B)	0.0014	17	1	0.0115	0.0175	CDK4
3	gata3 participate in activating the th2 cytokine genes expression(B)	0.0014	17	1	0.0115	0.0175	CDK4
3	tnfr1 signaling pathway(B)	0.0014	17	1	0.0115	0.0175	CDK4
3	pten dependent cell cycle arrest and apoptosis(B)	0.0014	17	1	0.0115	0.0175	CDK4
3	phosphoinositides and their downstream targets(B)	0.0014	17	1	0.0115	0.0175	CDK4
3	nitric oxide signaling pathway(B)	0.0014	17	1	0.0115	0.0175	CDK4
3	cdk regulation of dna replication(B)	0.0014	17	1	0.0115	0.0175	CDK4
3	cell cycle: g2/m checkpoint(B)	0.0014	17	1	0.0115	0.0175	CDK4
3	map kinase inactivation of smrt corepressor(B)	0.0015	18	1	0.0122	0.0175	CDK4
3	sprouty regulation of tyrosine kinase signals(B)	0.0016	19	1	0.0129	0.0175	CDK4
3	cyclins and cell cycle regulation(B)	0.0016	19	1	0.0129	0.0175	CDK4
3	tgf beta signaling pathway(B)	0.0016	19	1	0.0129	0.0175	CDK4
3	fas signaling pathway (cd95)(B)	0.0016	19	1	0.0129	0.0175	CDK4
3	tumor suppressor arf inhibits ribosomal biogenesis(B)	0.0016	19	1	0.0129	0.0175	CDK4
3	tnf/stress related signaling(B)	0.0017	20	1	0.0135	0.0175	CDK4
3	role of brca1 brca2 and atr in cancer susceptibility(B)	0.0017	20	1	0.0135	0.0175	CDK4
3	lissencephaly gene (lis1) in neuronal migration and development(B)	0.0017	20	1	0.0135	0.0175	CDK4
3	hypoxia and p53 in the cardiovascular system(B)	0.0017	20	1	0.0135	0.0175	CDK4
3	regulation of bad phosphorylation(B)	0.0017	20	1	0.0135	0.0175	CDK4
3	egf signaling pathway(B)	0.0018	21	1	0.0142	0.0175	CDK4
3	segmentation clock(B)	0.0018	21	1	0.0142	0.0175	CDK4
3	cell cycle: g1/s check point(B)	0.0018	21	1	0.0142	0.0175	CDK4
3	induction of apoptosis through dr3 and dr4/5 death receptors(B)	0.0018	21	1	0.0142	0.0175	CDK4
3	how progesterone initiates the oocyte maturation(B)	0.0018	21	1	0.0142	0.0175	CDK4
3	nf-kb signaling pathway(B)	0.0018	21	1	0.0142	0.0175	CDK4
3	igf-1 signaling pathway(B)	0.0018	21	1	0.0142	0.0175	CDK4
3	regulation of ck1/cdk5 by type 1 glutamate receptors(B)	0.0018	21	1	0.0142	0.0175	CDK4
3	stathmin and breast cancer resistance to antimicrotubule agents(B)	0.0019	22	1	0.0149	0.0175	CDK4
3	ras signaling pathway(B)	0.0019	22	1	0.0149	0.0175	CDK4
3	inhibition of cellular proliferation by gleevec(B)	0.0019	22	1	0.0149	0.0175	CDK4
3	ccr3 signaling in eosinophils(B)	0.0019	22	1	0.0149	0.0175	CDK4
3	influence of ras and rho proteins on g1 to s transition(B)	0.0019	22	1	0.0149	0.0175	CDK4
3	signaling pathway from g-protein families(B)	0.0019	22	1	0.0149	0.0175	CDK4
3	regulation of eif-4e and p70s6 kinase(B)	0.002	23	1	0.0155	0.0175	CDK4
3	links between pyk2 and map kinases(B)	0.002	23	1	0.0155	0.0175	CDK4
3	role of erk5 in neuronal survival pathway(B)	0.002	23	1	0.0155	0.0175	CDK4
3	Cytokine-cytokine receptor interaction(K)	0.025	294	2	0.0158	0.0175	BMP4,BMPR1B
3	skeletal muscle hypertrophy is regulated via akt-mtor pathway(B)	0.002	24	1	0.0162	0.0175	CDK4
3	fmlp induced chemokine gene expression in hmc-1 cells(B)	0.002	24	1	0.0162	0.0175	CDK4
3	mtor signaling pathway(B)	0.002	24	1	0.0162	0.0175	CDK4
3	nfkb activation by nontypeable hemophilus influenzae(B)	0.002	24	1	0.0162	0.0175	CDK4
3	transcription factor creb and its extracellular signals(B)	0.002	24	1	0.0162	0.0175	CDK4
3	fc epsilon receptor i signaling in mast cells(B)	0.0021	25	1	0.0169	0.0175	CDK4
3	tpo signaling pathway(B)	0.0021	25	1	0.0169	0.0175	CDK4
3	ras-independent pathway in nk cell-mediated cytotoxicity(B)	0.0021	25	1	0.0169	0.0175	CDK4
3	bcr signaling pathway(B)	0.0022	26	1	0.0175	0.0175	CDK4
3	mcalpain and friends in cell motility(B)	0.0022	26	1	0.0175	0.0175	CDK4
3	bioactive peptide induced signaling pathway(B)	0.0022	26	1	0.0175	0.0175	CDK4
3	ÃŸ-arrestins in gpcr desensitization(B)	0.0022	26	1	0.0175	0.0175	ADRB2
3	multi-step regulation of transcription by pitx2(B)	0.0022	26	1	0.0175	0.0175	CDK4
3	pdgf signaling pathway(B)	0.0022	26	1	0.0175	0.0175	CDK4
3	role of erbb2 in signal transduction and oncology(B)	0.0024	28	1	0.0189	0.0189	CDK4
3	Signaling by BMP(R)	0.0024	28	1	0.0189	0.0189	BMPR1B
3	vegf hypoxia and angiogenesis(B)	0.0024	28	1	0.0189	0.0189	CDK4
3	wnt signaling pathway(B)	0.0026	30	1	0.0202	0.0202	CDK4
3	hiv-1 nef: negative effector of fas and tnf(B)	0.0026	30	1	0.0202	0.0202	CDK4
3	erk and pi-3 kinase are necessary for collagen binding in corneal epithelia(B)	0.0026	30	1	0.0202	0.0202	CDK4
3	ceramide signaling pathway(B)	0.0026	30	1	0.0202	0.0202	CDK4
3	phospholipids as signalling intermediaries(B)	0.0026	31	1	0.0209	0.0209	CDK4
3	p38 mapk signaling pathway(B)	0.0026	31	1	0.0209	0.0209	CDK4
3	role of egf receptor transactivation by gpcrs in cardiac hypertrophy(B)	0.0026	31	1	0.0209	0.0209	CDK4
3	trefoil factors initiate mucosal healing(B)	0.0026	31	1	0.0209	0.0209	CDK4
3	rho cell motility signaling pathway(B)	0.0027	32	1	0.0216	0.0216	CDK4
3	Meiotic recombination(R)	0.0027	32	1	0.0216	0.0216	CDK4
3	Syndecan-4-mediated signaling events(N)	0.0027	32	1	0.0216	0.0216	DNM2
3	Transcriptional regulation of granulopoiesis(R)	0.0027	32	1	0.0216	0.0216	CDK4
3	toll-like receptor pathway(B)	0.0027	32	1	0.0216	0.0216	CDK4
3	angiotensin ii mediated activation of jnk pathway via pyk2 dependent signaling(B)	0.0028	33	1	0.0222	0.0222	CDK4
3	Oncogene Induced Senescence(R)	0.0028	33	1	0.0222	0.0222	CDK4
3	integrin signaling pathway(B)	0.0028	33	1	0.0222	0.0222	CDK4
3	actions of nitric oxide in the heart(B)	0.0028	33	1	0.0222	0.0222	CDK4
3	Arf6 signaling events(N)	0.003	35	1	0.0236	0.0236	ADRB2
3	signal transduction through il1r(B)	0.003	35	1	0.0236	0.0236	CDK4
3	inactivation of gsk3 by akt causes accumulation of b-catenin in alveolar macrophages(B)	0.0031	36	1	0.0242	0.0242	CDK4
3	rac1 cell motility signaling pathway(B)	0.0031	37	1	0.0249	0.0249	CDK4
3	nfat and hypertrophy of the heart (B)	0.0032	38	1	0.0256	0.0256	CDK4
3	FOXM1 transcription factor network(N)	0.0035	41	1	0.0275	0.0275	CDK4
3	Bladder cancer(K)	0.0035	41	1	0.0275	0.0275	CDK4
3	ion channels and their functional role in vascular endothelium(B)	0.0036	42	1	0.0282	0.0282	ADRB2
3	PAR1-mediated thrombin signaling events(N)	0.0037	43	1	0.0289	0.0289	DNM2
3	il-2 receptor beta chain in t cell activation(B)	0.0037	44	1	0.0295	0.0295	CDK4
3	trans-Golgi Network Vesicle Budding(R)	0.0038	45	1	0.0302	0.0302	DNM2
3	agrin in postsynaptic differentiation(B)	0.0038	45	1	0.0302	0.0302	CDK4
3	Calcineurin-regulated NFAT-dependent transcription in lymphocytes(N)	0.0039	46	1	0.0309	0.0309	CDK4
3	keratinocyte differentiation(B)	0.004	47	1	0.0315	0.0315	CDK4
3	Posttranslational regulation of adherens junction stability and dissassembly(N)	0.0041	48	1	0.0322	0.0322	DNM2
3	t cell receptor signaling pathway(B)	0.0042	49	1	0.0328	0.0328	CDK4
3	Signaling by PTK6(R)	0.0043	51	1	0.0342	0.0342	CDK4
3	Endocrine and other factor-regulated calcium reabsorption(K)	0.0045	53	1	0.0355	0.0355	DNM2
3	Senescence-Associated Secretory Phenotype (SASP)(R)	0.0045	53	1	0.0355	0.0355	CDK4
3	mapkinase signaling pathway(B)	0.0045	53	1	0.0355	0.0355	CDK4
3	Regulation of lipolysis in adipocytes(K)	0.0047	55	1	0.0368	0.0368	ADRB2
3	ATF-2 transcription factor network(N)	0.0049	58	1	0.0388	0.0388	CDK4
3	Basal cell carcinoma(K)	0.0054	63	1	0.0421	0.0421	BMP4
3	Signaling events mediated by VEGFR1 and VEGFR2(N)	0.0054	63	1	0.0421	0.0421	DNM2
3	Regulation of retinoblastoma protein(N)	0.0054	64	1	0.0427	0.0427	CDK4
3	Oxidative Stress Induced Senescence(R)	0.0056	66	1	0.044	0.044	CDK4
3	Non-small cell lung cancer(K)	0.0056	66	1	0.044	0.044	CDK4
3	Plasma lipoprotein assembly, remodeling, and clearance(R)	0.0058	68	1	0.0453	0.0453	BMP1
3	Renin secretion(K)	0.0059	69	1	0.046	0.046	ADRB2
3	Pathways in cancer(K)	0.0451	531	2	0.0476	0.0476	BMP4,CDK4
3	p53 signaling pathway(K)	0.0061	72	1	0.0479	0.0479	CDK4
3	Melanoma(K)	0.0061	72	1	0.0479	0.0479	CDK4
3	Bacterial invasion of epithelial cells(K)	0.0062	73	1	0.0486	0.0486	DNM2
3	Glioma(K)	0.0064	75	1	0.0499	0.0499	CDK4
4	RIG-I-like receptor signaling pathway(K)	0.006	70	3	8.394e-07	1.0906e-05	IFIH1,MAVS,DDX58
4	DDX58/IFIH1-mediated induction of interferon-alpha/beta(R)	0.0063	74	3	9.9142e-07	1.0906e-05	IFIH1,MAVS,DDX58
4	Herpes simplex virus 1 infection(K)	0.0417	491	4	3.0367e-06	2.1257e-05	IFIH1,MAVS,DDX58,TRAF5
4	Measles(K)	0.0117	138	3	6.4035e-06	3.2017e-05	IFIH1,MAVS,DDX58
4	Hepatitis B(K)	0.0138	162	3	1.0343e-05	3.5839e-05	IFIH1,MAVS,DDX58
4	Influenza A(K)	0.0145	170	3	1.1946e-05	3.5839e-05	IFIH1,MAVS,DDX58
4	Epstein-Barr virus infection(K)	0.0171	201	3	1.9706e-05	5.7424e-05	MAVS,DDX58,TRAF5
4	Deubiquitination(R)	0.0194	228	3	2.8712e-05	5.7424e-05	IFIH1,MAVS,DDX58
4	Cytosolic DNA-sensing pathway(K)	0.0054	63	2	0.00017091	0.00034182	MAVS,DDX58
4	NF-kappa B signaling pathway(K)	0.0087	102	2	0.00044602	0.00089204	DDX58,TRAF5
4	Hepatitis C(K)	0.0132	155	2	0.0010237	0.0013919	MAVS,DDX58
4	NOD-like receptor signaling pathway(K)	0.0154	181	2	0.0013919	0.0013919	MAVS,TRAF5
4	OAS antiviral response(R)	0.0008	9	1	0.0030572	0.0030572	DDX58
4	Small cell lung cancer(K)	0.0078	92	1	0.0309	0.0309	TRAF5
4	IL-17 signaling pathway(K)	0.008	94	1	0.0316	0.0316	TRAF5
4	TNF signaling pathway(K)	0.0095	112	1	0.0375	0.0375	TRAF5
5	Nonsense-Mediated Decay (NMD)(R)	0.0092	108	4	7.1084e-09	5.755e-08	RPS26,RPL41,PABPC1,RPL29
5	Eukaryotic Translation Initiation(R)	0.0095	112	4	8.2214e-09	5.755e-08	RPS26,RPL41,PABPC1,RPL29
5	Signaling by ROBO receptors(R)	0.0171	201	4	8.5282e-08	4.2641e-07	RPS26,RPL41,PABPC1,RPL29
5	Eukaryotic Translation Elongation(R)	0.0072	85	3	1.5015e-06	2.8266e-06	RPS26,RPL41,RPL29
5	Eukaryotic Translation Termination(R)	0.0073	86	3	1.555e-06	2.8266e-06	RPS26,RPL41,RPL29
5	Response of EIF2AK4 (GCN2) to amino acid deficiency(R)	0.008	94	3	2.0295e-06	2.8266e-06	RPS26,RPL41,RPL29
5	SRP-dependent cotranslational protein targeting to membrane(R)	0.0088	103	3	2.6685e-06	2.8266e-06	RPS26,RPL41,RPL29
5	Selenoamino acid metabolism(R)	0.0089	105	3	2.8266e-06	2.8266e-06	RPS26,RPL41,RPL29
5	Ribosome(K)	0.013	153	3	8.7183e-06	8.7183e-06	RPS26,RPL41,RPL29
5	rRNA processing(R)	0.0162	191	3	1.692e-05	1.692e-05	RPS26,RPL41,RPL29
5	Deadenylation-dependent mRNA decay(R)	0.0047	55	1	0.0186	0.0186	PABPC1
5	RNA degradation(K)	0.0067	79	1	0.0266	0.0266	PABPC1
5	Regulation of mRNA stability by proteins that bind AU-rich elements(R)	0.0074	87	1	0.0293	0.0293	PABPC1
5	mRNA surveillance pathway(K)	0.0077	91	1	0.0306	0.0306	PABPC1
6	Mitotic Metaphase and Anaphase(R)	0.0145	170	3	3.0193e-06	6.9318e-06	ZWILCH,CENPK,CENPO
6	Mitotic Prometaphase(R)	0.0151	178	3	3.4659e-06	6.9318e-06	ZWILCH,CENPK,CENPO
6	Cell Cycle Checkpoints(R)	0.0209	246	3	9.1488e-06	9.1488e-06	ZWILCH,CENPK,CENPO
6	Nucleosome assembly(R)	0.0025	29	2	1.8207e-05	1.8207e-05	CENPK,CENPO
6	Signaling by Rho GTPases(R)	0.0295	347	3	2.5677e-05	2.5677e-05	ZWILCH,CENPK,CENPO
7	RAF/MAP kinase cascade(R)	0.0173	204	3	5.2173e-06	0.00054463	NRAS,CSF2RB,IL2RG
7	FLT3 Signaling(R)	0.0189	222	3	6.7238e-06	0.00054463	NRAS,CSF2RB,IL2RG
7	GMCSF-mediated signaling events(N)	0.0031	37	2	2.9624e-05	0.0011078	NRAS,CSF2RB
7	Interleukin-3, Interleukin-5 and GM-CSF signaling(R)	0.0032	38	2	3.1246e-05	0.0011078	CSF2RB,IL2RG
7	Interleukin-2 family signaling(R)	0.0034	40	2	3.4617e-05	0.0011078	CSF2RB,IL2RG
7	SHP2 signaling(N)	0.0043	51	2	5.624e-05	0.0014499	NRAS,IL2RG
7	IL2-mediated signaling events(N)	0.0046	54	2	6.304e-05	0.0014499	NRAS,IL2RG
7	Downstream signaling in na&#xef;ve CD8+ T cells(N)	0.0055	65	2	9.1281e-05	0.0016562	NRAS,IL2RG
7	Pathways in cancer(K)	0.0451	531	3	9.2011e-05	0.0016562	NRAS,CSF2RB,IL2RG
7	Apoptosis(K)	0.0116	136	2	0.00039799	0.0063679	NRAS,CSF2RB
7	JAK-STAT signaling pathway(K)	0.0138	162	2	0.00056387	0.0078942	CSF2RB,IL2RG
7	Human T-cell leukemia virus 1 infection(K)	0.0186	219	2	0.0010271	0.0134	NRAS,IL2RG
7	Cytokine-cytokine receptor interaction(K)	0.025	294	2	0.0018431	0.0177	CSF2RB,IL2RG
7	PI3K-Akt signaling pathway(K)	0.0301	354	2	0.0026629	0.0177	NRAS,IL2RG
7	il-7 signal transduction(B)	0.0009	11	1	0.002803	0.0177	IL2RG
7	il 2 signaling pathway(B)	0.0009	11	1	0.002803	0.0177	IL2RG
7	il 3 signaling pathway(B)	0.0011	13	1	0.0033121	0.0177	CSF2RB
7	Ras signaling in the CD4+ TCR pathway(N)	0.0012	14	1	0.0035666	0.0177	NRAS
7	IL5-mediated signaling events(N)	0.0012	14	1	0.0035666	0.0177	CSF2RB
7	il 4 signaling pathway(B)	0.0012	14	1	0.0035666	0.0177	IL2RG
7	Signaling by NTRK3 (TRKC)(R)	0.0013	15	1	0.003821	0.0177	NRAS
7	VEGF signaling pathway(P)	0.0015	18	1	0.004584	0.0177	NRAS
7	regulation of bad phosphorylation(B)	0.0017	20	1	0.0050925	0.0177	CSF2RB
7	Interleukin-7 signaling(R)	0.0019	22	1	0.0056008	0.0177	IL2RG
7	p53 pathway feedback loops 2(P)	0.002	24	1	0.0061089	0.0177	NRAS
7	Signaling by NTRK2 (TRKB)(R)	0.0021	25	1	0.0063629	0.0177	NRAS
7	Signaling by Erythropoietin(R)	0.0021	25	1	0.0063629	0.0177	NRAS
7	PI3 kinase pathway(P)	0.0022	26	1	0.0066169	0.0177	NRAS
7	IL3-mediated signaling events(N)	0.0023	27	1	0.0068708	0.0177	CSF2RB
7	IL2 signaling events mediated by STAT5(N)	0.0024	28	1	0.0071247	0.0177	IL2RG
7	EGF receptor (ErbB1) signaling pathway(N)	0.0025	29	1	0.0073785	0.0177	NRAS
7	Surfactant metabolism(R)	0.0025	29	1	0.0073785	0.0177	CSF2RB
7	Trk receptor signaling mediated by the MAPK pathway(N)	0.0028	33	1	0.0083933	0.0177	NRAS
7	CXCR3-mediated signaling events(N)	0.003	35	1	0.0089005	0.0177	NRAS
7	IL2 signaling events mediated by PI3K(N)	0.003	35	1	0.0089005	0.0177	IL2RG
7	Internalization of ErbB1(N)	0.003	35	1	0.0089005	0.0177	NRAS
7	Trk receptor signaling mediated by PI3K and PLC-gamma(N)	0.0031	36	1	0.009154	0.0177	NRAS
7	ErbB2/ErbB3 signaling events(N)	0.0031	37	1	0.0094075	0.0177	NRAS
7	Thyroid cancer(K)	0.0031	37	1	0.0094075	0.0177	NRAS
7	Primary immunodeficiency(K)	0.0032	38	1	0.0096609	0.0177	IL2RG
7	EPHB forward signaling(N)	0.0032	38	1	0.0096609	0.0177	NRAS
7	Signaling by FGFR3(R)	0.0034	40	1	0.0102	0.0177	NRAS
7	Class I PI3K signaling events(N)	0.0034	40	1	0.0102	0.0177	NRAS
7	Signaling by FGFR4(R)	0.0035	41	1	0.0104	0.0177	NRAS
7	Bladder cancer(K)	0.0035	41	1	0.0104	0.0177	NRAS
7	Signaling by SCF-KIT(R)	0.0035	41	1	0.0104	0.0177	NRAS
7	Plasma membrane estrogen receptor signaling(N)	0.0036	42	1	0.0107	0.0177	NRAS
7	Signaling by ERBB2(R)	0.0037	43	1	0.0109	0.0177	NRAS
7	il-2 receptor beta chain in t cell activation(B)	0.0037	44	1	0.0112	0.0177	IL2RG
7	DAP12 interactions(R)	0.0037	44	1	0.0112	0.0177	NRAS
7	Signaling by EGFR(R)	0.004	47	1	0.0119	0.0177	NRAS
7	Signaling by FGFR1(R)	0.0042	49	1	0.0124	0.0177	NRAS
7	Signaling by PDGF(R)	0.0043	51	1	0.013	0.0177	NRAS
7	Signaling by PTK6(R)	0.0043	51	1	0.013	0.0177	NRAS
7	Signaling by MET(R)	0.0044	52	1	0.0132	0.0177	NRAS
7	NCAM signaling for neurite out-growth(R)	0.0046	54	1	0.0137	0.0177	NRAS
7	Signaling by Type 1 Insulin-like Growth Factor 1 Receptor (IGF1R)(R)	0.0046	54	1	0.0137	0.0177	NRAS
7	Interleukin signaling pathway(P)	0.0047	55	1	0.014	0.0177	NRAS
7	TCR signaling in na&#xef;ve CD8+ T cells(N)	0.0047	55	1	0.014	0.0177	NRAS
7	Signaling by ERBB4(R)	0.0048	57	1	0.0145	0.0177	NRAS
7	Endometrial cancer(K)	0.0049	58	1	0.0147	0.0177	NRAS
7	B cell activation(P)	0.005	59	1	0.015	0.0177	NRAS
7	VEGF signaling pathway(K)	0.005	59	1	0.015	0.0177	NRAS
7	Neurotrophic factor-mediated Trk receptor signaling(N)	0.0051	60	1	0.0152	0.0177	NRAS
7	Long-term depression(K)	0.0051	60	1	0.0152	0.0177	NRAS
7	IL12-mediated signaling events(N)	0.0053	62	1	0.0157	0.0177	IL2RG
7	Longevity regulating pathway - multiple species(K)	0.0053	62	1	0.0157	0.0177	NRAS
7	Ras Pathway(P)	0.0054	63	1	0.016	0.0177	NRAS
7	mTOR signaling pathway(N)	0.0054	64	1	0.0162	0.0177	NRAS
7	IL4-mediated signaling events(N)	0.0054	64	1	0.0162	0.0177	IL2RG
7	GnRH secretion(K)	0.0054	64	1	0.0162	0.0177	NRAS
7	Mitophagy - animal(K)	0.0055	65	1	0.0165	0.0177	NRAS
7	Inflammatory bowel disease (IBD)(K)	0.0055	65	1	0.0165	0.0177	IL2RG
7	Angiogenesis(P)	0.0056	66	1	0.0167	0.0177	NRAS
7	Non-small cell lung cancer(K)	0.0056	66	1	0.0167	0.0177	NRAS
7	Acute myeloid leukemia(K)	0.0057	67	1	0.017	0.0177	NRAS
7	Long-term potentiation(K)	0.0057	67	1	0.017	0.0177	NRAS
7	Fc epsilon RI signaling pathway(K)	0.0058	68	1	0.0172	0.0177	NRAS
7	TCR signaling in na&#xef;ve CD4+ T cells(N)	0.0058	68	1	0.0172	0.0177	NRAS
7	Renal cell carcinoma(K)	0.0059	69	1	0.0175	0.0177	NRAS
7	Central carbon metabolism in cancer(K)	0.0059	69	1	0.0175	0.0177	NRAS
7	Prolactin signaling pathway(K)	0.006	70	1	0.0177	0.0177	NRAS
7	Signaling by FGFR2(R)	0.006	71	1	0.018	0.018	NRAS
7	Melanoma(K)	0.0061	72	1	0.0183	0.0183	NRAS
7	Signaling by NTRK1 (TRKA)(R)	0.0062	73	1	0.0185	0.0185	NRAS
7	Glioma(K)	0.0064	75	1	0.019	0.019	NRAS
7	Chronic myeloid leukemia(K)	0.0065	76	1	0.0193	0.0193	NRAS
7	Signaling by Insulin receptor(R)	0.0065	77	1	0.0195	0.0195	NRAS
7	EGFR tyrosine kinase inhibitor resistance(K)	0.0067	79	1	0.02	0.02	NRAS
7	T cell activation(P)	0.0069	81	1	0.0205	0.0205	NRAS
7	B cell receptor signaling pathway(K)	0.007	82	1	0.0208	0.0208	NRAS
7	C-MYB transcription factor network(N)	0.007	82	1	0.0208	0.0208	NRAS
7	EGF receptor signaling pathway(P)	0.007	82	1	0.0208	0.0208	NRAS
7	ErbB signaling pathway(K)	0.0072	85	1	0.0215	0.0215	NRAS
7	Colorectal cancer(K)	0.0073	86	1	0.0218	0.0218	NRAS
7	Gap junction(K)	0.0075	88	1	0.0223	0.0223	NRAS
7	PD-L1 expression and PD-1 checkpoint pathway in cancer(K)	0.0076	89	1	0.0225	0.0225	NRAS
7	Longevity regulating pathway(K)	0.0076	89	1	0.0225	0.0225	NRAS
7	FGF signaling pathway(P)	0.0078	92	1	0.0233	0.0233	NRAS
7	Th1 and Th2 cell differentiation(K)	0.0078	92	1	0.0233	0.0233	IL2RG
7	GnRH signaling pathway(K)	0.0079	93	1	0.0235	0.0235	NRAS
7	Signaling by VEGF(R)	0.008	94	1	0.0238	0.0238	NRAS
7	Prostate cancer(K)	0.0082	97	1	0.0245	0.0245	NRAS
7	Endocrine resistance(K)	0.0082	97	1	0.0245	0.0245	NRAS
7	Choline metabolism in cancer(K)	0.0083	98	1	0.0248	0.0248	NRAS
7	Viral protein interaction with cytokine and cytokine receptor(K)	0.0085	100	1	0.0253	0.0253	IL2RG
7	ErbB1 downstream signaling(N)	0.0085	100	1	0.0253	0.0253	NRAS
7	AGE-RAGE signaling pathway in diabetic complications(K)	0.0085	100	1	0.0253	0.0253	NRAS
7	Melanogenesis(K)	0.0086	101	1	0.0255	0.0255	NRAS
7	C-type lectin receptor signaling pathway(K)	0.0088	104	1	0.0263	0.0263	NRAS
7	T cell receptor signaling pathway(K)	0.0088	104	1	0.0263	0.0263	NRAS
7	Th17 cell differentiation(K)	0.0091	107	1	0.027	0.027	IL2RG
7	Interleukin-4 and Interleukin-13 signaling(R)	0.0094	111	1	0.028	0.028	IL2RG
7	Cholinergic synapse(K)	0.0095	112	1	0.0283	0.0283	NRAS
7	Serotonergic synapse(K)	0.0097	114	1	0.0288	0.0288	NRAS
7	Growth hormone synthesis, secretion and action(K)	0.0101	119	1	0.03	0.03	NRAS
7	Neurotrophin signaling pathway(K)	0.0101	119	1	0.03	0.03	NRAS
7	Sphingolipid signaling pathway(K)	0.0101	119	1	0.03	0.03	NRAS
7	Thyroid hormone signaling pathway(K)	0.0101	119	1	0.03	0.03	NRAS
7	PDGFR-beta signaling pathway(N)	0.0102	120	1	0.0303	0.0303	NRAS
7	Relaxin signaling pathway(K)	0.011	129	1	0.0325	0.0325	NRAS
7	Natural killer cell mediated cytotoxicity(K)	0.0111	131	1	0.033	0.033	NRAS
7	FoxO signaling pathway(K)	0.0111	131	1	0.033	0.033	NRAS
7	Autophagy - animal(K)	0.0116	137	1	0.0345	0.0345	NRAS
7	Apelin signaling pathway(K)	0.0116	137	1	0.0345	0.0345	NRAS
7	Insulin signaling pathway(K)	0.0116	137	1	0.0345	0.0345	NRAS
7	Estrogen signaling pathway(K)	0.0117	138	1	0.0348	0.0348	NRAS
7	ESR-mediated signaling(R)	0.0117	138	1	0.0348	0.0348	NRAS
7	Measles(K)	0.0117	138	1	0.0348	0.0348	IL2RG
7	C-type lectin receptors (CLRs)(R)	0.0118	139	1	0.035	0.035	NRAS
7	Signaling pathways regulating pluripotency of stem cells(K)	0.0119	140	1	0.0353	0.0353	NRAS
7	Breast cancer(K)	0.0125	147	1	0.037	0.037	NRAS
7	Phospholipase D signaling pathway(K)	0.0126	148	1	0.0373	0.0373	NRAS
7	Gastric cancer(K)	0.0127	149	1	0.0375	0.0375	NRAS
7	Oxytocin signaling pathway(K)	0.013	153	1	0.0385	0.0385	NRAS
7	mTOR signaling pathway(K)	0.013	153	1	0.0385	0.0385	NRAS
7	Hepatitis C(K)	0.0132	155	1	0.039	0.039	NRAS
7	Integrin signalling pathway(P)	0.0134	158	1	0.0398	0.0398	NRAS
7	Cellular senescence(K)	0.0136	160	1	0.0403	0.0403	NRAS
7	Hepatitis B(K)	0.0138	162	1	0.0408	0.0408	NRAS
7	Hepatocellular carcinoma(K)	0.0143	168	1	0.0422	0.0422	NRAS
7	Signaling by the B Cell Receptor (BCR)(R)	0.0145	171	1	0.043	0.043	NRAS
7	Neurotransmitter receptors and postsynaptic signal transmission(R)	0.015	177	1	0.0445	0.0445	NRAS
7	Axon guidance(K)	0.0154	181	1	0.0455	0.0455	NRAS
7	Alcoholism(K)	0.0156	184	1	0.0462	0.0462	NRAS
7	Kaposi sarcoma-associated herpesvirus infection(K)	0.0158	186	1	0.0467	0.0467	NRAS
7	Chemokine signaling pathway(K)	0.0161	189	1	0.0474	0.0474	NRAS
7	G alpha (q) signalling events(R)	0.0166	195	1	0.0489	0.0489	NRAS
8	mTOR signaling pathway(N)	0.0054	64	2	8.8499e-05	0.001239	PRR5,SGK1
8	Ion channel transport(R)	0.0125	147	2	0.00046469	0.0020129	TSC22D3,SGK1
8	mTOR signaling pathway(K)	0.013	153	2	0.00050322	0.0020129	PRR5,SGK1
8	Aldosterone-regulated sodium reabsorption(K)	0.0031	37	1	0.0094075	0.016	SGK1
8	Class I PI3K signaling events(N)	0.0034	40	1	0.0102	0.016	SGK1
8	Insulin Pathway(N)	0.0038	45	1	0.0114	0.016	SGK1
8	FoxO family signaling(N)	0.0042	49	1	0.0124	0.016	SGK1
8	Costimulation by the CD28 family(R)	0.0054	63	1	0.016	0.016	PRR5
8	RNA Polymerase II Transcription(R)	0.0775	911	2	0.0171	0.0171	PRR5,SGK1
8	Glucocorticoid receptor regulatory network(N)	0.0066	78	1	0.0198	0.0198	SGK1
8	Signaling by VEGF(R)	0.008	94	1	0.0238	0.0238	PRR5
8	FoxO signaling pathway(K)	0.0111	131	1	0.033	0.033	SGK1
9	Formation of Fibrin Clot (Clotting Cascade)(R)	0.0033	39	2	1.0994e-05	6.5966e-05	SERPINE2,F13A1
9	Alpha9 beta1 integrin signaling events(N)	0.0021	25	1	0.0042465	0.0127	F13A1
9	Beta1 integrin cell surface interactions(N)	0.0056	66	1	0.0112	0.0144	F13A1
9	Complement and coagulation cascades(K)	0.0072	85	1	0.0144	0.0144	F13A1
9	Interleukin-4 and Interleukin-13 signaling(R)	0.0094	111	1	0.0188	0.0188	F13A1
9	Response to elevated platelet cytosolic Ca2+(R)	0.0097	114	1	0.0193	0.0193	F13A1
10	Fanconi Anemia Pathway(R)	0.0031	36	2	9.3679e-06	3.7472e-05	CENPX,FAAP24
10	Fanconi anemia pathway(K)	0.0046	54	2	2.1078e-05	4.2156e-05	CENPX,FAAP24
10	Nucleosome assembly(R)	0.0025	29	1	0.0049251	0.0049251	CENPX
10	Fanconi anemia pathway(N)	0.0038	45	1	0.0076371	0.0076371	FAAP24
11	Cholinergic synapse(K)	0.0095	112	2	9.0672e-05	0.0020656	GNG10,PIK3R6
11	Apelin signaling pathway(K)	0.0116	137	2	0.00013567	0.0020656	GNG10,PIK3R6
11	Kaposi sarcoma-associated herpesvirus infection(K)	0.0158	186	2	0.00025007	0.0020656	GNG10,PIK3R6
11	Chemokine signaling pathway(K)	0.0161	189	2	0.0002582	0.0020656	GNG10,PIK3R6
11	PI3K-Akt signaling pathway(K)	0.0301	354	2	0.00090582	0.0054349	GNG10,PIK3R6
11	G-protein beta:gamma signalling(R)	0.0013	15	1	0.002549	0.0127	PIK3R6
11	IL8- and CXCR1-mediated signaling events(N)	0.0024	28	1	0.0047554	0.0173	PIK3R6
11	GPVI-mediated activation cascade(R)	0.0026	30	1	0.0050947	0.0173	PIK3R6
11	IL8- and CXCR2-mediated signaling events(N)	0.0029	34	1	0.005773	0.0173	PIK3R6
11	PI Metabolism(R)	0.0058	68	1	0.0115	0.0193	PIK3R6
11	GABAergic synapse(K)	0.0076	89	1	0.0151	0.0193	GNG10
11	Integration of energy metabolism(R)	0.0077	90	1	0.0152	0.0193	GNG10
11	Potassium Channels(R)	0.0077	90	1	0.0152	0.0193	GNG10
11	Morphine addiction(K)	0.0077	91	1	0.0154	0.0193	GNG10
11	Circadian entrainment(K)	0.0082	97	1	0.0164	0.0193	GNG10
11	Toxoplasmosis(K)	0.0095	112	1	0.019	0.0193	PIK3R6
11	Glutamatergic synapse(K)	0.0097	114	1	0.0193	0.0193	GNG10
11	Serotonergic synapse(K)	0.0097	114	1	0.0193	0.0193	GNG10
11	Platelet activation(K)	0.0105	124	1	0.021	0.021	PIK3R6
11	Relaxin signaling pathway(K)	0.011	129	1	0.0218	0.0218	GNG10
11	Dopaminergic synapse(K)	0.0112	132	1	0.0223	0.0223	GNG10
11	Retrograde endocannabinoid signaling(K)	0.0126	148	1	0.025	0.025	GNG10
11	Phospholipase D signaling pathway(K)	0.0126	148	1	0.025	0.025	PIK3R6
11	Adrenergic signaling in cardiomyocytes(K)	0.0127	149	1	0.0252	0.0252	PIK3R6
11	Oxytocin signaling pathway(K)	0.013	153	1	0.0258	0.0258	PIK3R6
11	cGMP-PKG signaling pathway(K)	0.0142	167	1	0.0282	0.0282	PIK3R6
11	Neurotransmitter receptors and postsynaptic signal transmission(R)	0.015	177	1	0.0299	0.0299	GNG10
11	Alcoholism(K)	0.0156	184	1	0.031	0.031	GNG10
11	Human immunodeficiency virus 1 infection(K)	0.018	212	1	0.0357	0.0357	GNG10
11	Human cytomegalovirus infection(K)	0.0191	225	1	0.0379	0.0379	GNG10
11	Ras signaling pathway(K)	0.0197	232	1	0.0391	0.0391	GNG10
12	Interferon alpha/beta signaling(R)	0.0058	68	1	0.0057813	0.0057813	IFI35
13	Class I MHC mediated antigen processing & presentation(R)	0.0162	191	2	0.0002637	0.0010548	TRIM21,HERC6
13	Cytosolic sensors of pathogen-associated DNA (R)	0.0054	63	1	0.0107	0.0129	TRIM21
13	Interferon gamma signaling(R)	0.0065	76	1	0.0129	0.0129	TRIM21
13	Systemic lupus erythematosus(K)	0.0113	133	1	0.0225	0.0225	TRIM21
14	Cilium Assembly(R)	0.0153	180	2	0.0002342	0.00093679	CENPJ,KIF24
14	Mitotic G2-G2/M phases(R)	0.015	177	1	0.0299	0.03	CENPJ
14	Mitotic Prometaphase(R)	0.0151	178	1	0.03	0.03	CENPJ
